# Supplementary material
Source: publisher figshare collection journal article supplement (https://gsajournals.figshare.com/ndownloader/files/33040142)
Supplement: Supplementary file 1 [file 33040142]

Location	Year	Id	Tray	xCoord	yCoord	HD	PH	KLength	KWidth	KArea	TW	TKW	SpikeCompac	SL	SPS	KPS	KPSpike	SYield	Yield	rustScore	rustCategory	glumeBlotch
Kin	18	35	1.2.1	1	65	NA	95	6.305	3.042	14.138	8.7	32.342	NA	NA	20.5	NA	NA	NA	NA	0	R	4
Kin	18	1	1.3.1	1	66	NA	100	6.135	3.063	13.962	9.2	28.84	NA	NA	21.333333333333332	NA	NA	NA	NA	25	S	4
Kin	18	72	1.4.1	1	67	NA	110	6.98	3.134	16.37	13.9	34.069	NA	NA	24.666666666666668	NA	NA	NA	NA	0	R	1
Kin	18	21	1.5.1	1	68	NA	90	5.945	2.922	13.042	9.8	25.193	NA	NA	22.666666666666668	NA	NA	NA	NA	15	S	6
Kin	18	54	1.6.1	1	69	NA	105	6.593	2.948	14.423	8.5	31.136	NA	NA	21	NA	NA	NA	NA	0	R	3
Kin	18	37	1.7.1	1	70	NA	100	6.025	2.842	12.636	6.6	25.191	NA	NA	21.666666666666668	NA	NA	NA	NA	0	R	3
Kin	18	MPV57	1.8.1	1	71	NA	95	5.936	2.873	12.589	9	26.393	NA	NA	23.833333333333332	NA	NA	NA	NA	15	S	2
Kin	18	45	1.9.1	1	72	NA	100	6.341	2.995	13.917	9.3	28.882	NA	NA	20.333333333333332	NA	NA	NA	NA	30	S	4
Kin	18	52	1.10.1	1	73	NA	110	6.661	3.133	15.236	11.5	35.061	NA	NA	21.166666666666668	NA	NA	NA	NA	0	R	7
Kin	18	23	1.11.1	1	74	NA	95	6.457	2.969	14.035	8.7	28.618	NA	NA	23.166666666666668	NA	NA	NA	NA	20	S	7
Kin	18	51	1.12.1	1	75	NA	110	6.097	3.306	14.749	8.3	37.387	NA	NA	20.166666666666668	NA	NA	NA	NA	40	S	6
Kin	18	14	1.13.1	1	76	NA	110	6.522	2.966	14.241	8.8	30.556	NA	NA	22	NA	NA	NA	NA	0	R	2
Kin	18	66	1.14.1	1	77	NA	105	5.76	3.123	13.075	7.9	28.417	NA	NA	21	NA	NA	NA	NA	60	S	8
Kin	18	70	1.15.1	1	78	NA	90	6.272	3.13	14.634	12.1	31.429	NA	NA	23.833333333333332	NA	NA	NA	NA	40	S	7
Kin	18	31	1.16.1	1	79	NA	110	6.4905	3.221	15.274999999999999	7.5	34.449	NA	NA	21.833333333333332	NA	NA	NA	NA	0	R	3
Kin	18	9	1.17.1	1	80	NA	100	6.3	2.831	13.211	8.7	25.513	NA	NA	23.833333333333332	NA	NA	NA	NA	20	S	7
Kin	18	60	1.18.1	1	81	NA	85	6.144	3.002	13.563	9.6	28.07	NA	NA	21.666666666666668	NA	NA	NA	NA	0	R	8
Kin	18	5	1.19.1	1	82	NA	115	6.326	3.193	14.868	11.5	35.826	NA	NA	21.833333333333332	NA	NA	NA	NA	0	R	2
Kin	18	71	1.20.1	1	83	NA	90	5.973	3.045	13.46	9.4	26.554	NA	NA	22.666666666666668	NA	NA	NA	NA	20	S	8
Kin	18	351	2.2.1	1	86	NA	120	6.609	3.041	14.82	10.2	31.677	NA	NA	20.833333333333332	NA	NA	NA	NA	10	S	5
Kin	18	308	2.3.1	1	87	NA	95	6.005	2.838	12.488	7.2	25.442	NA	NA	19.166666666666668	NA	NA	NA	NA	10	S	5
Kin	18	LA95135	2.4.1	1	88	NA	95	6.54	2.989	14.501	8.2	30.597	NA	NA	17.666666666666668	NA	NA	NA	NA	0	R	7
Kin	18	353	2.5.1	1	89	NA	95	6.304	2.972	13.698	8.9	30.584	NA	NA	17.666666666666668	NA	NA	NA	NA	0	R	7
Kin	18	293	2.6.1	1	90	NA	80	6.297	2.9	13.283	6.9	24.126	NA	NA	20	NA	NA	NA	NA	50	S	9
Kin	18	333	2.7.1	1	91	NA	85	5.826	2.63	11.492	6.8	20.059	NA	NA	22	NA	NA	NA	NA	0	R	3
Kin	18	348	2.8.1	1	92	NA	75	6.614	3.001	14.593	8.6	27.302	NA	NA	17.666666666666668	NA	NA	NA	NA	0	R	7
Kin	18	305	2.9.1	1	93	NA	75	6.383	2.814	13.148	8.7	23.706	NA	NA	20.333333333333332	NA	NA	NA	NA	20	S	9
Kin	18	354	2.10.1	1	94	NA	110	5.999	2.87	12.511	8.9	26.331	NA	NA	19.333333333333332	NA	NA	NA	NA	20	S	5
Kin	18	304	2.11.1	1	95	NA	95	6.236	2.792	12.911	8.2	24.118	NA	NA	21	NA	NA	NA	NA	40	S	6
Kin	18	320	2.12.1	1	96	NA	100	6.49	2.79	13.332	6.6	24.627	NA	NA	18.666666666666668	NA	NA	NA	NA	40	S	7
Kin	18	349	2.13.1	1	97	NA	85	6.322	2.934	13.733	9	28.754	NA	NA	20	NA	NA	NA	NA	20	S	8
Kin	18	300	2.14.1	1	98	NA	95	6.613	2.982	14.335	8	29.963	NA	NA	20.666666666666668	NA	NA	NA	NA	50	S	6
Kin	18	357	2.15.1	1	99	NA	90	6.671	3.196	15.374	11.4	31.844	NA	NA	19.166666666666668	NA	NA	NA	NA	0	R	5
Kin	18	MPV57	2.16.1	1	100	NA	85	6.04	2.806	12.476	7.6	25.333	NA	NA	18.833333333333332	NA	NA	NA	NA	20	S	3
Kin	18	340	2.17.1	1	101	NA	85	6.407	2.827	13.396	8.3	24.484	NA	NA	19.5	NA	NA	NA	NA	0	R	7
Kin	18	322	2.18.1	1	102	NA	90	6.213	3.109	14.106	9.1	31.818	NA	NA	18.5	NA	NA	NA	NA	20	S	4
Kin	18	LA95135	2.19.1	1	103	NA	100	6.639	3.143	15.452	10.2	33.663	NA	NA	18.833333333333332	NA	NA	NA	NA	0	R	4
Kin	18	298	2.20.1	1	104	NA	115	6.369	2.989	13.943	8.3	30.627	NA	NA	21	NA	NA	NA	NA	20	S	4
Kin	18	LA95135	1.1.2	2	64	NA	NA	6.418	3.17	15.162	10.7	36.519	NA	NA	18.833333333333332	NA	NA	NA	NA	0	R	4
Kin	18	17	1.2.2	2	65	NA	85	6.125	2.984	13.685	7.6	26.855	NA	NA	20.833333333333332	NA	NA	NA	NA	0	R	4
Kin	18	27	1.3.2	2	66	NA	105	6.357	3.231	15.148	10	35.587	NA	NA	20.333333333333332	NA	NA	NA	NA	25	S	5
Kin	18	29	1.4.2	2	67	NA	100	6.05	2.83	12.692	8	26.403	NA	NA	20.666666666666668	NA	NA	NA	NA	0	R	0
Kin	18	44	1.5.2	2	68	NA	105	6.042	3.203	14.3	10.6	31.832	NA	NA	22.166666666666668	NA	NA	NA	NA	0	R	5
Kin	18	3	1.6.2	2	69	NA	100	6.453	3.044	14.354	9.1	31.058	NA	NA	21.5	NA	NA	NA	NA	10	S	3
Kin	18	32	1.7.2	2	70	NA	95	6.045	2.988	13.114	6.9	29.362	NA	NA	18.5	NA	NA	NA	NA	0	R	4
Kin	18	57	1.8.2	2	71	NA	80	6.056	2.802	12.298	6.3	26.582	NA	NA	16.833333333333332	NA	NA	NA	NA	0	R	3
Kin	18	26	1.9.2	2	72	NA	95	5.967	2.591	11.391	4.8	19.048	NA	NA	18.666666666666668	NA	NA	NA	NA	0	R	3
Kin	18	12	1.10.2	2	73	NA	90	6.44	3.108	14.711	9.6	33.103	NA	NA	20.666666666666668	NA	NA	NA	NA	0	R	6
Kin	18	40	1.11.2	2	74	NA	90	6.004	3.117	13.858	9.9	31.329	NA	NA	21.666666666666668	NA	NA	NA	NA	0	R	8
Kin	18	LA95135	1.12.2	2	75	NA	100	6.46	3.134	14.877	9.4	34.182	NA	NA	19.5	NA	NA	NA	NA	0	R	5
Kin	18	63	1.13.2	2	76	NA	105	6.447	3.071	14.528	8.8	32	NA	NA	19	NA	NA	NA	NA	50	S	7
Kin	18	34	1.14.2	2	77	NA	105	6.862	3.239	16.298	11.5	39.116	NA	NA	20.833333333333332	NA	NA	NA	NA	0	R	5
Kin	18	6	1.15.2	2	78	NA	105	6.305	3.153	14.655	10.1	32.581	NA	NA	20.833333333333332	NA	NA	NA	NA	60	S	7
Kin	18	65	1.16.2	2	79	NA	100	6.28	2.937	13.612	9.5	28.19	NA	NA	21.666666666666668	NA	NA	NA	NA	20	S	8
Kin	18	69	1.17.2	2	80	NA	125	6.093	3.156	14.426	11.5	34.639	NA	NA	20.666666666666668	NA	NA	NA	NA	0	R	1
Kin	18	19	1.18.2	2	81	NA	85	6.6815	3.01	14.9645	11.100000000000001	28.8875	NA	NA	22.166666666666668	NA	NA	NA	NA	0	R	7
Kin	18	48	1.19.2	2	82	NA	105	6.36	3.303	15.575	11.2	34.146	NA	NA	20.833333333333332	NA	NA	NA	NA	0	R	7
Kin	18	41	1.20.2	2	83	NA	100	6.055	2.994	13.537	10.4	29.545	NA	NA	21.5	NA	NA	NA	NA	0	R	6
Kin	18	MPV57	2.1.2	2	85	NA	95	6.021	2.762	12.165	7.3	22.462	NA	NA	20.666666666666668	NA	NA	NA	NA	10	S	3
Kin	18	302	2.2.2	2	86	NA	90	6.484	2.995	14.201	7.9	26.599	NA	NA	21.5	NA	NA	NA	NA	0	R	5
Kin	18	319	2.3.2	2	87	NA	65	6.198	2.876	13.161	6.9	23.154	NA	NA	20.166666666666668	NA	NA	NA	NA	50	S	9
Kin	18	341	2.4.2	2	88	NA	95	6.092	2.805	12.638	7	23.81	NA	NA	19.333333333333332	NA	NA	NA	NA	40	S	6
Kin	18	317	2.5.2	2	89	NA	70	5.952	2.862	12.719	6.7	21.069	NA	NA	20	NA	NA	NA	NA	40	S	9
Kin	18	343	2.6.2	2	90	NA	80	6.387	2.99	14.172	8.5	30.466	NA	NA	19.666666666666668	NA	NA	NA	NA	0	R	6
Kin	18	299	2.7.2	2	91	NA	75	6.555	2.898	14.064	5.6	25	NA	NA	19.666666666666668	NA	NA	NA	NA	0	R	5
Kin	18	316	2.8.2	2	92	NA	95	5.882	2.784	12.218	7.9	21.467	NA	NA	23.166666666666668	NA	NA	NA	NA	0	R	4
Kin	18	335	2.9.2	2	93	NA	105	6.215	3.089	14.26	8.9	31.119	NA	NA	19.333333333333332	NA	NA	NA	NA	40	S	6
Kin	18	289	2.10.2	2	94	NA	75	6.248	2.858	13.068	6.9	23.958	NA	NA	18.833333333333332	NA	NA	NA	NA	0	R	8
Kin	18	327	2.11.2	2	95	NA	80	6.153	2.736	12.476	7.4	20.442	NA	NA	21.333333333333332	NA	NA	NA	NA	40	S	5
Kin	18	325	2.12.2	2	96	NA	85	6.465	2.907	13.865	6.9	27.381	NA	NA	17.666666666666668	NA	NA	NA	NA	0	R	7
Kin	18	294	2.13.2	2	97	NA	85	6.267	2.844	13.084	6.5	25.794	NA	NA	19.166666666666668	NA	NA	NA	NA	0	R	7
Kin	18	331	2.14.2	2	98	NA	95	6.53	2.917	13.791	8.8	28.479	NA	NA	20.5	NA	NA	NA	NA	NA	mix	7
Kin	18	313	2.15.2	2	99	NA	95	6.665	3.057	15.262	10.1	30.33	NA	NA	21.833333333333332	NA	NA	NA	NA	0	R	3
Kin	18	339	2.16.2	2	100	NA	95	6.385	3.009	14.162	9.6	28.829	NA	NA	19.5	NA	NA	NA	NA	15	S	4
Kin	18	309	2.17.2	2	101	NA	105	6.015	2.921	13.04	8.6	28.667	NA	NA	19.333333333333332	NA	NA	NA	NA	0	R	4
Kin	18	MPV57	2.18.2	2	102	NA	85	6.185	2.784	12.641	8.3	22.312	NA	NA	21.666666666666668	NA	NA	NA	NA	20	S	4
Kin	18	292	2.19.2	2	103	NA	105	6.224	2.927	13.297	9.3	30.097	NA	NA	17.5	NA	NA	NA	NA	20	S	3
Kin	18	328	2.20.2	2	104	NA	85	5.708	2.588	10.823	6.4	21.622	NA	NA	19.166666666666668	NA	NA	NA	NA	20	S	5
Kin	18	MPV57	1.1.3	3	64	NA	90	6.052	2.785	12.439	8.9	23.733	NA	NA	23	NA	NA	NA	NA	5	S	2
Kin	18	33	1.2.3	3	65	NA	70	6.17	2.851	13.145	8.5	27.331	NA	NA	19.833333333333332	NA	NA	NA	NA	10	S	2
Kin	18	43	1.3.3	3	66	NA	105	6.219	3.134	14.682	9.7	33.333	NA	NA	21.5	NA	NA	NA	NA	50	S	2
Kin	18	7	1.4.3	3	67	NA	95	6.61	3.03	14.913	7.6	33.628	NA	NA	19.666666666666668	NA	NA	NA	NA	50	S	6
Kin	18	38	1.5.3	3	68	NA	95	6.141	2.974	13.346	6.1	31.443	NA	NA	18.5	NA	NA	NA	NA	25	S	4
Kin	18	22	1.6.3	3	69	NA	90	6.04	3.046	13.64	9.2	30.363	NA	NA	22	NA	NA	NA	NA	40	S	6
Kin	18	56	1.7.3	3	70	NA	105	6.338	3.156	14.641	9.95	34.662	NA	NA	20.833333333333332	NA	NA	NA	NA	0	R	3
Kin	18	20	1.8.3	3	71	NA	90	6.113	2.847	12.87	8.6	23.37	NA	NA	22.833333333333332	NA	NA	NA	NA	40	S	5
Kin	18	8	1.9.3	3	72	NA	105	6.402	2.847	13.253	8.5	24.011	NA	NA	24.833333333333332	NA	NA	NA	NA	30	S	3
Kin	18	50	1.10.3	3	73	NA	65	6.793	2.81	14.073	5.3	24.883	NA	NA	20	NA	NA	NA	NA	40	S	8
Kin	18	MPV57	1.11.3	3	74	NA	105	5.974	2.867	12.719	8.1	25.313	NA	NA	22	NA	NA	NA	NA	20	S	4
Kin	18	59	1.12.3	3	75	NA	100	6.222	3.072	14.052	10.2	32.278	NA	NA	21.833333333333332	NA	NA	NA	NA	20	S	2
Kin	18	42	1.13.3	3	76	NA	95	6.545	2.961	14.318	8	30.534	NA	NA	20.666666666666668	NA	NA	NA	NA	20	S	4
Kin	18	28	1.14.3	3	77	NA	95	6.067	2.804	12.602	7.2	25.806	NA	NA	19.333333333333332	NA	NA	NA	NA	0	R	6
Kin	18	62	1.15.3	3	78	NA	105	6.257	2.956	13.582	8.4	29.371	NA	NA	21.166666666666668	NA	NA	NA	NA	0	R	5
Kin	18	18	1.16.3	3	79	NA	90	6.382	3.123	14.856	11	32.07	NA	NA	23.333333333333332	NA	NA	NA	NA	50	S	6
Kin	18	36	1.17.3	3	80	NA	105	6.195	2.803	12.648	6.2	24.603	NA	NA	17.333333333333332	NA	NA	NA	NA	0	R	4
Kin	18	68	1.18.3	3	81	NA	85	6.355	3.069	14.418	10.9	29.459	NA	NA	24.166666666666668	NA	NA	NA	NA	20	S	9
Kin	18	24	1.19.3	3	82	NA	105	6.257	2.901	13.121	8.3	30.072	NA	NA	20.166666666666668	NA	NA	NA	NA	5	S	6
Kin	18	53	1.20.3	3	83	NA	100	5.976	2.871	12.648	7.8	27.465	NA	NA	20	NA	NA	NA	NA	5	S	6
Kin	18	LA95135	2.1.3	3	85	NA	95	6.566	3.034	14.648	9	33.21	NA	NA	17	NA	NA	NA	NA	0	R	5
Kin	18	347	2.2.3	3	86	NA	80	6.057	2.918	13.342	7.9	24.308	NA	NA	22	NA	NA	NA	NA	30	S	5
Kin	18	337	2.3.3	3	87	NA	95	6.358	2.927	13.725	8.3	27.393	NA	NA	19.666666666666668	NA	NA	NA	NA	0	R	7
Kin	18	315	2.4.3	3	88	NA	90	6.071	2.983	13.39	8.5	27.157	NA	NA	19.166666666666668	NA	NA	NA	NA	40	S	6
Kin	18	338	2.5.3	3	89	NA	95	6.14	2.879	12.924	7	25.18	NA	NA	21	NA	NA	NA	NA	20	S	7
Kin	18	318	2.6.3	3	90	NA	90	6.118	2.915	13.1	7.7	28.947	NA	NA	18.833333333333332	NA	NA	NA	NA	10	S	7
Kin	18	346	2.7.3	3	91	NA	105	5.948	3.016	13.205	7.9	27.915	NA	NA	17.166666666666668	NA	NA	NA	NA	20	S	5
Kin	18	MPV57	2.8.3	3	92	NA	80	6.102	2.848	12.83	7.9	24.383	NA	NA	20.5	NA	NA	NA	NA	20	S	3
Kin	18	342	2.9.3	3	93	NA	80	6.15	2.836	13.03	8.1	22.881	NA	NA	22.666666666666668	NA	NA	NA	NA	20	S	6
Kin	18	332	2.10.3	3	94	NA	65	6.298	2.853	13.232	7.5	23.885	NA	NA	20.166666666666668	NA	NA	NA	NA	20	S	8
Kin	18	352	2.11.3	3	95	NA	75	5.854	2.87	12.569	7.3	18.388	NA	NA	21.666666666666668	NA	NA	NA	NA	40	S	5
Kin	18	LA95135	2.12.3	3	96	NA	95	6.749	3.103	15.49	9.9	34.859	NA	NA	18.333333333333332	NA	NA	NA	NA	0	R	6
Kin	18	330	2.13.3	3	97	NA	80	6.565	2.874	14	7.5	26.132	NA	NA	19.666666666666668	NA	NA	NA	NA	0	R	6
Kin	18	344	2.14.3	3	98	NA	90	6.866	2.991	14.88	8.5	32.197	NA	NA	19.166666666666668	NA	NA	NA	NA	0	R	7
Kin	18	350	2.15.3	3	99	NA	95	6.28	2.955	13.701	10.4	26.396	NA	NA	21.166666666666668	NA	NA	NA	NA	0	R	5
Kin	18	306	2.16.3	3	100	NA	80	6.545	2.83	13.571	8.2	26.115	NA	NA	19.5	NA	NA	NA	NA	20	S	5
Kin	18	336	2.17.3	3	101	NA	110	6.751	2.973	14.479	10.7	29.477	NA	NA	22.5	NA	NA	NA	NA	10	S	5
Kin	18	358	2.18.3	3	102	NA	100	6.693	2.969	14.791	9.6	28.487	NA	NA	20	NA	NA	NA	NA	0	R	4
Kin	18	324	2.19.3	3	103	NA	110	6.717	3.158	15.714	11.5	33.626	NA	NA	20	NA	NA	NA	NA	0	R	3
Kin	18	356	2.20.3	3	104	NA	90	6.752	2.873	14.223	9.7	29.129	NA	NA	19.333333333333332	NA	NA	NA	NA	0	R	4
Kin	18	LA95135	1.1.4	4	64	NA	95	6.358	2.822	13.354	8.8	26.994	NA	NA	20	NA	NA	NA	NA	0	R	3
Kin	18	25	1.2.4	4	65	NA	80	6.155	2.867	13.056	8.9	26.331	NA	NA	20.166666666666668	NA	NA	NA	NA	10	S	5
Kin	18	16	1.3.4	4	66	NA	85	6.175	2.976	13.534	7.7	27.698	NA	NA	19.166666666666668	NA	NA	NA	NA	0	R	2
Kin	18	46	1.4.4	4	67	NA	115	6.5	2.842	13.585	7.2	25.623	NA	NA	19.166666666666668	NA	NA	NA	NA	0	R	5
Kin	18	10	1.5.4	4	68	NA	100	5.601	2.996	12.281	9.2	28.571	NA	NA	20.8	NA	NA	NA	NA	25	S	7
Kin	18	47	1.6.4	4	69	NA	90	6.276	3.079	14.162	7.2	30.508	NA	NA	17	NA	NA	NA	NA	0	R	0
Kin	18	4	1.7.4	4	70	NA	80	6.366	3.134	14.654	10.6	33.866	NA	NA	21	NA	NA	NA	NA	30	S	5
Kin	18	55	1.8.4	4	71	NA	95	5.684	2.788	11.781	7	24.648	NA	NA	20.166666666666668	NA	NA	NA	NA	30	S	6
Kin	18	39	1.9.4	4	72	NA	105	6.677	3	14.627	9.9	31.629	NA	NA	20.833333333333332	NA	NA	NA	NA	0	R	2
Kin	18	15	1.10.4	4	73	NA	80	5.634	2.7585	11.2915	4.65	23.000999999999998	NA	NA	19.75	NA	NA	NA	NA	0	R	5
Kin	18	58	1.11.4	4	74	NA	90	6.678	3.203	15.763	10.7	36.395	NA	NA	21	NA	NA	NA	NA	0	R	5
Kin	18	30	1.12.4	4	75	NA	95	6.563	3.059	14.444	9.3	32.517	NA	NA	20.666666666666668	NA	NA	NA	NA	0	R	4
Kin	18	11	1.13.4	4	76	NA	100	6.192	3.062	13.957	10.7	29.235	NA	NA	23.5	NA	NA	NA	NA	0	R	5
Kin	18	64	1.14.4	4	77	NA	100	6.375	3.099	14.605	9.75	32.9825	NA	NA	21.25	NA	NA	NA	NA	0	R	6
Kin	18	2	1.15.4	4	78	NA	95	6.38	3.151	14.885	10.6	35.811	NA	NA	22	NA	NA	NA	NA	20	S	4
Kin	18	67	1.16.4	4	79	NA	100	6.275	3.161	14.464	9.2	35.115	NA	NA	20.333333333333332	NA	NA	NA	NA	0	R	5
Kin	18	49	1.17.4	4	80	NA	100	6.43	2.984	13.985	9.3	29.524	NA	NA	19.833333333333332	NA	NA	NA	NA	0	R	3
Kin	18	LA95135	1.18.4	4	81	NA	95	6.524	3.13	14.925	9.1	34.211	NA	NA	17.5	NA	NA	NA	NA	0	R	5
Kin	18	61	1.19.4	4	82	NA	100	5.935	2.991	13.272	9.9	26.471	NA	NA	22.666666666666668	NA	NA	NA	NA	5	S	5
Kin	18	13	1.20.4	4	83	NA	110	6.483	3.091	14.95	9.9	30.841	NA	NA	20.666666666666668	NA	NA	NA	NA	0	R	4
Kin	18	LA95135	2.1.4	4	85	NA	100	6.552	3.078	14.968	9.1	31.488	NA	NA	18.166666666666668	NA	NA	NA	NA	0	R	6
Kin	18	321	2.2.4	4	86	NA	95	6.4	2.964	14.017	9.7	26.503	NA	NA	20.333333333333332	NA	NA	NA	NA	10	S	6
Kin	18	296	2.3.4	4	87	NA	80	6.399	2.866	13.4	7.9	26.421	NA	NA	20.333333333333332	NA	NA	NA	NA	50	S	9
Kin	18	355	2.4.4	4	88	NA	70	6.371	2.756	12.988	6.1	22.101	NA	NA	17.666666666666668	NA	NA	NA	NA	30	S	9
Kin	18	291	2.5.4	4	89	NA	90	6.346	2.906	13.521	8.6	26.22	NA	NA	21.333333333333332	NA	NA	NA	NA	0	R	5
Kin	18	310	2.6.4	4	90	NA	105	6.52	2.986	14.371	11	30.055	NA	NA	21.833333333333332	NA	NA	NA	NA	5	S	7
Kin	18	312	2.7.4	4	91	NA	75	6.328	2.894	13.614	8.5	26.646	NA	NA	21.166666666666668	NA	NA	NA	NA	0	R	8
Kin	18	329	2.8.4	4	92	NA	105	6.338	3.133	14.475	9.7	32.013	NA	NA	19	NA	NA	NA	NA	20	S	3
Kin	18	311	2.9.4	4	93	NA	90	6.1315	2.884	12.938	6.4	26.612000000000002	NA	NA	22	NA	NA	NA	NA	0	R	7
Kin	18	297	2.10.4	4	94	NA	90	6.678	2.968	14.603	8.2	26.537	NA	NA	21.5	NA	NA	NA	NA	0	R	7
Kin	18	303	2.11.4	4	95	NA	95	6.164	3.038	13.961	11	27.431	NA	NA	21.833333333333332	NA	NA	NA	NA	40	S	5
Kin	18	334	2.12.4	4	96	NA	80	6.252	2.789	12.817	7.6	22.485	NA	NA	19.333333333333332	NA	NA	NA	NA	5	S	8
Kin	18	307	2.13.4	4	97	NA	75	6.551	2.862	13.873	8.9	27.554	NA	NA	20.333333333333332	NA	NA	NA	NA	0	R	7
Kin	18	323	2.14.4	4	98	NA	80	5.566	2.748	11.27	6.8	20.923	NA	NA	20.666666666666668	NA	NA	NA	NA	40	S	9
Kin	18	290	2.15.4	4	99	NA	95	6.188	2.843	12.93	7.2	26.374	NA	NA	20.333333333333332	NA	NA	NA	NA	5	S	8
Kin	18	345	2.16.4	4	100	NA	100	6.554	3.137	15.281	10.3	32.698	NA	NA	20	NA	NA	NA	NA	0	R	6
Kin	18	314	2.17.4	4	101	NA	105	6.447	3.219	15.521	12.8	36.782	NA	NA	20.666666666666668	NA	NA	NA	NA	0	R	2
Kin	18	295	2.18.4	4	102	NA	80	6.354	2.815	13.239	8.8	24.11	NA	NA	21.166666666666668	NA	NA	NA	NA	30	S	8
Kin	18	326	2.19.4	4	103	NA	120	6.637	3.049	15.033	12.6	32.898	NA	NA	21.333333333333332	NA	NA	NA	NA	0	R	2
Kin	18	301	2.20.4	4	104	NA	90	6.139	2.6	11.225	0.5	19.231	NA	NA	19.916666666666668	NA	NA	NA	NA	0	R	4
Kin	18	346	7.20.4	6	1	NA	115	5.832	3.017	13.025	8.7	28.431	NA	NA	20.166666666666668	NA	NA	NA	NA	20	S	4
Kin	18	342	7.19.4	6	2	NA	85	6.258	3.001	14.06	12.5	26.205	NA	NA	26	NA	NA	NA	NA	10	S	4
Kin	18	293	7.18.4	6	3	NA	80	6.168	2.912	13.07	8.9	25.575	NA	NA	22.166666666666668	NA	NA	NA	NA	20	S	7
Kin	18	343	7.17.4	6	4	NA	90	6.381	3.092	14.643	10.1	35.069	NA	NA	18.833333333333332	NA	NA	NA	NA	0	R	5
Kin	18	304	7.16.4	6	5	NA	100	6.167	3.052	13.935	11.1	31.092	NA	NA	21.333333333333332	NA	NA	NA	NA	20	S	6
Kin	18	333	7.15.4	6	6	NA	95	5.614	2.678	11.135	6.7	23.675	NA	NA	20.5	NA	NA	NA	NA	0	R	2
Kin	18	296	7.14.4	6	7	NA	80	6.484	3.026	14.373	10.3	32.595	NA	NA	21	NA	NA	NA	NA	30	S	8
Kin	18	335	7.13.4	6	8	NA	105	6.17	3.236	14.809	10.7	34.185	NA	NA	19.666666666666668	NA	NA	NA	NA	30	S	3
Kin	18	328	7.12.4	6	9	NA	80	5.541	2.594	10.677	6.5	21.595	NA	NA	19.5	NA	NA	NA	NA	15	S	7
Kin	18	318	7.11.4	6	10	NA	100	6.148	3.004	13.691	9.7	32.77	NA	NA	20	NA	NA	NA	NA	10	S	5
Kin	18	MPV57	7.10.4	6	11	NA	90	6.028	2.903	12.911	8.3	27.213	NA	NA	22.333333333333332	NA	NA	NA	NA	15	S	3
Kin	18	340	7.9.4	6	12	NA	80	6.138	2.88	12.919	8.4	26.752	NA	NA	21.166666666666668	NA	NA	NA	NA	0	R	5
Kin	18	300	7.8.4	6	13	NA	105	6.536	3.024	14.418	7.6	31.276	NA	NA	20.166666666666668	NA	NA	NA	NA	20	S	5
Kin	18	322	7.7.4	6	14	NA	90	5.981	2.966	12.918	7.9	27.719	NA	NA	19.333333333333332	NA	NA	NA	NA	0	R	3
Kin	18	289	7.6.4	6	15	NA	65	6.239	2.934	13.594	6.4	27.468	NA	NA	17.166666666666668	NA	NA	NA	NA	0	R	6
Kin	18	301	7.5.4	6	16	NA	82	6.342	2.858	13.246	1.9	27.143	NA	NA	17.916666666666668	NA	NA	NA	NA	0	R	5
Kin	18	LA95135	7.4.4	6	17	NA	95	6.616	3.322	15.961	10.3	39.768	NA	NA	18.333333333333332	NA	NA	NA	NA	0	R	6
Kin	18	320	7.3.4	6	18	NA	100	6.51	3.027	14.246	7.6	32.203	NA	NA	19.5	NA	NA	NA	NA	30	S	6
Kin	18	351	7.2.4	6	19	NA	115	6.541	3.115	14.844	9.2	33.948	NA	NA	19.5	NA	NA	NA	NA	10	S	4
Kin	18	MPV57	7.1.4	6	20	NA	100	NA	NA	NA	NA	NA	NA	NA	22.666666666666668	NA	NA	NA	NA	15	S	3
Kin	18	64	6.20.4	6	22	NA	105	6.476	3.1955	15.322	12.2	34.4315	NA	NA	21.083333333333332	NA	NA	NA	NA	20	S	6
Kin	18	44	6.19.4	6	23	NA	95	6.198	3.259	15.039	10	33.557	NA	NA	19.666666666666668	NA	NA	NA	NA	0	R	5
Kin	18	65	6.18.4	6	24	NA	95	6.334	2.81	12.898	6.6	25.095	NA	NA	19	NA	NA	NA	NA	5	S	5
Kin	18	1	6.17.4	6	25	NA	80	6.389	3.223	15.444	12.1	34.67	NA	NA	21.833333333333332	NA	NA	NA	NA	20	S	6
Kin	18	37	6.16.4	6	26	NA	85	6.404	3.085	14.958	10.7	28.457	NA	NA	22.666666666666668	NA	NA	NA	NA	0	R	4
Kin	18	72	6.15.4	6	27	NA	95	7.297	3.12	16.826	11.1	37.627	NA	NA	21.333333333333332	NA	NA	NA	NA	0	R	4
Kin	18	47	6.14.4	6	28	NA	95	6.519	3.254	15.791	9.1	35.271	NA	NA	18.833333333333332	NA	NA	NA	NA	0	R	4
Kin	18	27	6.13.4	6	29	NA	90	6.352	3.094	14.374	7.5	33.333	NA	NA	17.833333333333332	NA	NA	NA	NA	5	S	5
Kin	18	69	6.12.4	6	30	NA	115	6.133	3.172	14.684	10.8	35.294	NA	NA	20.666666666666668	NA	NA	NA	NA	0	R	4
Kin	18	24	6.11.4	6	31	NA	90	6.382	2.924	13.599	9.3	30.693	NA	NA	20.333333333333332	NA	NA	NA	NA	10	S	5
Kin	18	29	6.10.4	6	32	NA	95	6.314	3.097	14.444	10.6	32.515	NA	NA	21	NA	NA	NA	NA	10	S	3
Kin	18	66	6.9.4	6	33	NA	95	5.743	2.929	12.432	7.6	26.573	NA	NA	19	NA	NA	NA	NA	0	R	5
Kin	18	3	6.8.4	6	34	NA	95	6.522	3.091	15.231	12.1	33.151	NA	NA	22.666666666666668	NA	NA	NA	NA	20	S	6
Kin	18	59	6.7.4	6	35	NA	110	6.167	3.02	14.004	9.7	30.218	NA	NA	22.666666666666668	NA	NA	NA	NA	10	S	5
Kin	18	42	6.6.4	6	36	NA	85	6.598	3.001	14.877	10.3	30.931	NA	NA	22.166666666666668	NA	NA	NA	NA	10	S	4
Kin	18	13	6.5.4	6	37	NA	100	6.364	3.135	15.066	10.3	35.889	NA	NA	19.5	NA	NA	NA	NA	0	R	5
Kin	18	11	6.4.4	6	38	NA	85	5.907	3.001	13.108	8.8	28.571	NA	NA	22	NA	NA	NA	NA	0	R	5
Kin	18	40	6.3.4	6	39	NA	90	5.875	3.033	13.457	8.7	29	NA	NA	21.333333333333332	NA	NA	NA	NA	0	R	5
Kin	18	28	6.2.4	6	40	NA	105	6.035	2.88	13.033	8.6	28.956	NA	NA	19.833333333333332	NA	NA	NA	NA	0	R	7
Kin	18	MPV57	6.1.4	6	41	NA	100	5.986	2.944	13.224	10.2	28.732	NA	NA	23.166666666666668	NA	NA	NA	NA	15	S	4
Kin	18	88	5.20.4	6	43	NA	95	6.368	3.254	15.451	9.5	38.618	NA	NA	18.5	NA	NA	NA	NA	0	R	7
Kin	18	129	5.19.4	6	44	NA	90	6.53	3.039	14.778	11.1	34.472	NA	NA	20	NA	NA	NA	NA	0	R	8
Kin	18	MPV57	5.18.4	6	45	NA	95	5.793	2.75	11.847	6.6	24.906	NA	NA	21	NA	NA	NA	NA	5	S	2
Kin	18	126	5.17.4	6	46	NA	100	6.402	2.986	14.263	11.2	32.184	NA	NA	21.666666666666668	NA	NA	NA	NA	0	R	4
Kin	18	82	5.16.4	6	47	NA	95	6.4985	2.98	14.289000000000001	8.15	29.5155	NA	NA	19.25	NA	NA	NA	NA	0	R	3
Kin	18	109	5.15.4	6	48	NA	80	6.26	3.017	13.952	9.3	29.808	NA	NA	20.666666666666668	NA	NA	NA	NA	0	R	5
Kin	18	131	5.14.4	6	49	NA	115	6.251	3.068	14.022	8.7	32.342	NA	NA	21	NA	NA	NA	NA	30	S	3
Kin	18	87	5.13.4	6	50	NA	75	6.381	2.896	13.739	8.5	25.915	NA	NA	22.5	NA	NA	NA	NA	40	S	8
Kin	18	120	5.12.4	6	51	NA	100	6.808	3.16	15.79	9.6	39.024	NA	NA	19.166666666666668	NA	NA	NA	NA	0	R	3
Kin	18	78	5.11.4	6	52	NA	100	5.92	2.707	11.934	6.1	24.898	NA	NA	16.666666666666668	NA	NA	NA	NA	0	R	4
Kin	18	97	5.10.4	6	53	NA	105	6.198	3.078	13.963	6.6	32.353	NA	NA	22	NA	NA	NA	NA	30	S	4
Kin	18	81	5.9.4	6	54	NA	80	6.032	2.916	13.015	10.1	24.877	NA	NA	22.5	NA	NA	NA	NA	15	S	6
Kin	18	135	5.8.4	6	55	NA	90	6.498	3.263	15.524	8	38.835	NA	NA	18.5	NA	NA	NA	NA	0	R	6
Kin	18	110	5.7.4	6	56	NA	105	6.34	3.177	14.894	11.3	32.754	NA	NA	22.5	NA	NA	NA	NA	0	R	3
Kin	18	LA95135	5.6.4	6	57	NA	105	6.386	3.308	15.7	9.5	38.934	NA	NA	18.333333333333332	NA	NA	NA	NA	0	R	6
Kin	18	113	5.5.4	6	58	NA	105	6.355	3.231	14.856	1.9	36.538	NA	NA	19.416666666666668	NA	NA	NA	NA	30	S	4
Kin	18	93	5.4.4	6	59	NA	95	6.509	3.181	14.984	9	34.221	NA	NA	18.166666666666668	NA	NA	NA	NA	0	R	4
Kin	18	74	5.3.4	6	60	NA	110	5.746	2.813	12.058	6.5	22.648	NA	NA	22.666666666666668	NA	NA	NA	NA	0	R	5
Kin	18	90	5.2.4	6	61	NA	100	5.832	2.931	12.817	9	27.778	NA	NA	21.666666666666668	NA	NA	NA	NA	40	S	3
Kin	18	MPV57	5.1.4	6	62	NA	105	6.19	3.167	14.539	8.9	32.963	NA	NA	22.666666666666668	NA	NA	NA	NA	20	S	3
Kin	18	164	4.20.4	6	64	NA	95	NA	NA	NA	NA	NA	NA	NA	17	NA	NA	NA	NA	0	R	1
Kin	18	178	4.19.4	6	65	NA	85	6.535	2.96	14.11	6.5	27.311	NA	NA	16	NA	NA	NA	NA	NA	NA	5
Kin	18	189	4.18.4	6	66	NA	105	5.654	2.751	11.217	5	22.222	NA	NA	19.166666666666668	NA	NA	NA	NA	20	S	3
Kin	18	151	4.17.4	6	67	NA	80	6.157	2.877	13.112	6.8	24.638	NA	NA	19	NA	NA	NA	NA	0	R	4
Kin	18	201	4.16.4	6	68	NA	85	6.078	3.243	14.45	9.9	34.737	NA	NA	21	NA	NA	NA	NA	0	R	6
Kin	18	152	4.15.4	6	69	NA	95	6.4405	3.1719999999999997	14.998999999999999	10.8	35.5145	NA	NA	22.083333333333332	NA	NA	NA	NA	0	R	5
Kin	18	168	4.14.4	6	70	NA	95	5.925	2.961	12.789	7.3	30.29	NA	NA	19.333333333333332	NA	NA	NA	NA	0	R	7
Kin	18	145	4.13.4	6	71	NA	90	6.028	2.826	12.432	7.6	25.249	NA	NA	21.333333333333332	NA	NA	NA	NA	20	S	7
Kin	18	165	4.12.4	6	72	NA	95	5.716	2.822	11.851	8	24.845	NA	NA	23.166666666666668	NA	NA	NA	NA	30	S	5
Kin	18	198	4.11.4	6	73	NA	95	6.375	2.769	12.744	6.1	25.311	NA	NA	20.5	NA	NA	NA	NA	30	S	4
Kin	18	146	4.10.4	6	74	NA	105	6.311	3.059	14.004	9.1	33.091	NA	NA	20.5	NA	NA	NA	NA	0	R	6
Kin	18	193	4.9.4	6	75	NA	95	6.374	3.069	14.466	10.2	29.226	NA	NA	22.833333333333332	NA	NA	NA	NA	40	S	4
Kin	18	163	4.8.4	6	76	NA	105	6.361	3.185	15.073	11.7	33.429	NA	NA	21.666666666666668	NA	NA	NA	NA	0	R	2
Kin	18	186	4.7.4	6	77	NA	90	6.202	2.945	13.071	7.4	30.833	NA	NA	19.833333333333332	NA	NA	NA	NA	0	R	5
Kin	18	183	4.6.4	6	78	NA	90	6.244	2.932	13.409	7.8	27.465	NA	NA	22.333333333333332	NA	NA	NA	NA	5	S	5
Kin	18	171	4.5.4	6	79	NA	85	6.238	2.848	13.019	7.3	22.121	NA	NA	22	NA	NA	NA	NA	40	S	7
Kin	18	149	4.4.4	6	80	NA	95	6.182	3.041	13.896	9.7	29.217	NA	NA	22.833333333333332	NA	NA	NA	NA	30	S	4
Kin	18	159	4.3.4	6	81	NA	95	6.291	2.878	13.382	6.9	24.468	NA	NA	21.666666666666668	NA	NA	NA	NA	20	S	7
Kin	18	162	4.2.4	6	82	NA	85	6.457	3.069	14.485	9	28.481	NA	NA	23.166666666666668	NA	NA	NA	NA	0	R	4
Kin	18	LA95135	4.1.4	6	83	NA	100	6.507	3.15	15.122	11	34.81	NA	NA	19.5	NA	NA	NA	NA	0	R	4
Kin	18	267	3.20.4	6	85	NA	80	6.669	2.826	14.154	8.6	23.181	NA	NA	21.333333333333332	NA	NA	NA	NA	5	S	4
Kin	18	MPV57	3.19.4	6	86	NA	80	6.106	2.785	12.46	8.3	22.493	NA	NA	20.833333333333332	NA	NA	NA	NA	10	S	2
Kin	18	224	3.18.4	6	87	NA	75	5.448	2.844	11.446	7.3	20	NA	NA	19.333333333333332	NA	NA	NA	NA	30	S	6
Kin	18	268	3.17.4	6	88	NA	80	6.368	3.049	14.364	9.8	28.824	NA	NA	21.666666666666668	NA	NA	NA	NA	0	R	6
Kin	18	221	3.16.4	6	89	NA	80	6	2.869	12.729	7.5	22.455	NA	NA	20.5	NA	NA	NA	NA	40	S	7
Kin	18	230	3.15.4	6	90	NA	85	6.242	2.822	12.817	8.6	22.572	NA	NA	21.5	NA	NA	NA	NA	0	R	7
Kin	18	259	3.14.4	6	91	NA	90	6.442	3.075	14.684	9.7	30.124	NA	NA	19.333333333333332	NA	NA	NA	NA	NA	mix	4
Kin	18	241	3.13.4	6	92	NA	105	6.145	3.061	13.808	12.2	32.973	NA	NA	18.833333333333332	NA	NA	NA	NA	0	R	2
Kin	18	244	3.12.4	6	93	NA	90	6.59	3.029	14.807	10.2	34.114	NA	NA	19.333333333333332	NA	NA	NA	NA	0	R	7
Kin	18	257	3.11.4	6	94	NA	85	6.403	2.936	13.801	7.5	27.473	NA	NA	16.666666666666668	NA	NA	NA	NA	0	R	4
Kin	18	LA95135	3.10.4	6	95	NA	108	6.445	3.069	14.601	10.6	32.515	NA	NA	18	NA	NA	NA	NA	0	R	5
Kin	18	278	3.9.4	6	96	NA	80	5.911	2.82	12.37	6.6	23.571	NA	NA	17.666666666666668	NA	NA	NA	NA	0	R	6
Kin	18	245	3.8.4	6	97	NA	90	5.751	2.813	12.037	7.5	22.455	NA	NA	20.5	NA	NA	NA	NA	5	S	7
Kin	18	265	3.7.4	6	98	NA	85	6.679	2.924	14.264	9	29.316	NA	NA	18.833333333333332	NA	NA	NA	NA	0	R	6
Kin	18	219	3.6.4	6	99	NA	100	6.227	3.018	13.771	9.9	29.032	NA	NA	20.5	NA	NA	NA	NA	30	S	5
Kin	18	284	3.5.4	6	100	NA	95	6.212	3.013	13.938	9.5	27.859	NA	NA	20.166666666666668	NA	NA	NA	NA	40	S	7
Kin	18	228	3.4.4	6	101	NA	90	6.185	3.105	14.042	8	28.986	NA	NA	18.333333333333332	NA	NA	NA	NA	20	S	5
Kin	18	287	3.3.4	6	102	NA	90	6.223	3.027	13.894	8.6	28.956	NA	NA	19.333333333333332	NA	NA	NA	NA	10	S	6
Kin	18	239	3.2.4	6	103	NA	115	6.033	3.065	13.425	9.7	28.035	NA	NA	20.333333333333332	NA	NA	NA	NA	40	S	4
Kin	18	LA95135	3.1.4	6	104	NA	95	6.581	3.261	15.951	11.2	38.225	NA	NA	18.5	NA	NA	NA	NA	0	R	5
Kin	18	353	7.20.3	7	1	NA	110	6.057	3.026	13.366	6.6	30.275	NA	NA	15.833333333333334	NA	NA	NA	NA	0	R	6
Kin	18	305	7.19.3	7	2	NA	85	6.073	2.857	12.742	7.2	25.623	NA	NA	19	NA	NA	NA	NA	10	S	6
Kin	18	349	7.18.3	7	3	NA	85	6.201	3.147	14.364	9.8	32.45	NA	NA	19.666666666666668	NA	NA	NA	NA	10	S	5
Kin	18	303	7.17.3	7	4	NA	95	6.05	3.183	14.105	9.3	31.633	NA	NA	20.5	NA	NA	NA	NA	10	S	3
Kin	18	337	7.16.3	7	5	NA	95	6.271	3.027	13.907	7.2	33.18	NA	NA	16.5	NA	NA	NA	NA	0	R	5
Kin	18	317	7.15.3	7	6	NA	70	5.914	3.009	13.159	6.9	26.236	NA	NA	19.333333333333332	NA	NA	NA	NA	30	S	7
Kin	18	316	7.14.3	7	7	NA	100	6.129	2.993	13.641	10.4	29.545	NA	NA	23.833333333333332	NA	NA	NA	NA	0	R	4
Kin	18	323	7.13.3	7	8	NA	80	5.547	3.038	12.467	7.5	28.302	NA	NA	19.166666666666668	NA	NA	NA	NA	35	S	6
Kin	18	302	7.12.3	7	9	NA	95	6.406	3.181	14.677	8.1	33.197	NA	NA	20.833333333333332	NA	NA	NA	NA	0	R	4
Kin	18	341	7.11.3	7	10	NA	100	6.188	2.988	13.794	9.1	30.233	NA	NA	20.166666666666668	NA	NA	NA	NA	15	S	3
Kin	18	350	7.10.3	7	11	NA	95	6.002	2.957	13.052	8.3	27.213	NA	NA	20.166666666666668	NA	NA	NA	NA	0	R	5
Kin	18	319	7.9.3	7	12	NA	70	6.049	3.035	13.649	7.5	27.675	NA	NA	19.666666666666668	NA	NA	NA	NA	25	S	7
Kin	18	336	7.8.3	7	13	NA	105	6.608	3.012	14.429	8.3	32.422	NA	NA	20.333333333333332	NA	NA	NA	NA	5	S	3
Kin	18	298	7.7.3	7	14	NA	110	6.392	3.101	14.479	10.1	32.372	NA	NA	20.333333333333332	NA	NA	NA	NA	15	S	4
Kin	18	331	7.6.3	7	15	NA	95	6.328	3.046	13.985	7.9	33.475	NA	NA	18	NA	NA	NA	NA	0	R	5
Kin	18	332	7.5.3	7	16	NA	70	6.257	3.042	14.02	9.9	28.448	NA	NA	21.833333333333332	NA	NA	NA	NA	5	S	7
Kin	18	327	7.4.3	7	17	NA	80	6.235	3.008	13.704	9.8	30.154	NA	NA	21.833333333333332	NA	NA	NA	NA	10	S	5
Kin	18	309	7.3.3	7	18	NA	100	6.096	3.089	13.926	8.6	34.263	NA	NA	19.333333333333332	NA	NA	NA	NA	0	R	3
Kin	18	355	7.2.3	7	19	NA	75	6.461	3.258	15.367	8.2	37.273	NA	NA	17.666666666666668	NA	NA	NA	NA	10	S	6
Kin	18	MPV57	7.1.3	7	20	NA	95	6.23	3.001	13.728	8.7	30.634	NA	NA	21.666666666666668	NA	NA	NA	NA	10	S	3
Kin	18	31	6.20.3	7	22	NA	100	6.4945	3.2535	15.119	2.5	32.981	NA	NA	22.181818181818183	NA	NA	NA	NA	0	R	4
Kin	18	63	6.19.3	7	23	NA	105	6.691	3.152	15.676	11.3	34.877	NA	NA	20.5	NA	NA	NA	NA	25	S	7
Kin	18	6	6.18.3	7	24	NA	95	6.432	3.078	14.59	9.7	30.599	NA	NA	20.833333333333332	NA	NA	NA	NA	20	S	5
Kin	18	57	6.17.3	7	25	NA	90	6.309	3.026	13.931	6.5	31.863	NA	NA	16.833333333333332	NA	NA	NA	NA	0	R	5
Kin	18	21	6.16.3	7	26	NA	80	5.931	2.957	13.192	8.8	26.506	NA	NA	21.833333333333332	NA	NA	NA	NA	10	S	7
Kin	18	50	6.15.3	7	27	NA	80	6.992	3.096	15.989	10.1	34.007	NA	NA	20.833333333333332	NA	NA	NA	NA	20	S	8
Kin	18	32	6.14.3	7	28	NA	90	6.165	3.047	13.814	8	32.258	NA	NA	18.5	NA	NA	NA	NA	0	R	5
Kin	18	55	6.13.3	7	29	NA	90	5.89	3.089	13.64	9.3	32.292	NA	NA	19.166666666666668	NA	NA	NA	NA	15	S	7
Kin	18	LA95135	6.12.3	7	30	NA	90	6.599	3.309	16.344	11	40.293	NA	NA	17.666666666666668	NA	NA	NA	NA	0	R	6
Kin	18	56	6.11.3	7	31	NA	95	6.34	3.136	14.275	1	40	NA	NA	18.666666666666668	NA	NA	NA	NA	0	R	4
Kin	18	54	6.10.3	7	32	NA	95	6.9	2.959	15.263	9	32.609	NA	NA	20.166666666666668	NA	NA	NA	NA	0	R	3
Kin	18	5	6.9.3	7	33	NA	110	6.275	3.171	14.848	8.9	35.743	NA	NA	18.666666666666668	NA	NA	NA	NA	30	S	3
Kin	18	60	6.8.3	7	34	NA	80	6.011	2.967	13.12	8	28.269	NA	NA	19	NA	NA	NA	NA	10	S	7
Kin	18	23	6.7.3	7	35	NA	90	6.55	3.077	14.972	9.7	31.19	NA	NA	23	NA	NA	NA	NA	10	S	6
Kin	18	MPV57	6.6.3	7	36	NA	95	5.872	2.88	12.726	8.2	26.115	NA	NA	22	NA	NA	NA	NA	10	S	3
Kin	18	52	6.5.3	7	37	NA	115	6.382	2.963	14.124	7.9	30.98	NA	NA	16.166666666666668	NA	NA	NA	NA	5	S	6
Kin	18	51	6.4.3	7	38	NA	105	6.144	3.306	15.303	8.5	39.171	NA	NA	19.166666666666668	NA	NA	NA	NA	30	S	5
Kin	18	8	6.3.3	7	39	NA	105	6.359	2.958	14.032	9.7	29.573	NA	NA	22.666666666666668	NA	NA	NA	NA	15	S	4
Kin	18	41	6.2.3	7	40	NA	95	5.917	3.119	13.869	8.9	32.963	NA	NA	21.333333333333332	NA	NA	NA	NA	0	R	5
Kin	18	LA95135	6.1.3	7	41	NA	100	6.381	3.417	16.297	12.3	42.561	NA	NA	18.166666666666668	NA	NA	NA	NA	0	R	5
Kin	18	142	5.20.3	7	43	NA	105	6.04	3.144	14.187	8.5	35.417	NA	NA	17.833333333333332	NA	NA	NA	NA	0	R	4
Kin	18	105	5.19.3	7	44	NA	100	6.564	3.157	15.314	10.2	28.977	NA	NA	22.166666666666668	NA	NA	NA	NA	20	S	4
Kin	18	118	5.18.3	7	45	NA	110	6.548	3.04	14.526	9.2	32.056	NA	NA	21.5	NA	NA	NA	NA	15	S	5
Kin	18	102	5.17.3	7	46	NA	110	6.057	2.948	13.218	7.8	30.116	NA	NA	20.166666666666668	NA	NA	NA	NA	0	R	3
Kin	18	123	5.16.3	7	47	NA	80	5.544	2.693	11.098	7	20.349	NA	NA	21.5	NA	NA	NA	NA	20	S	4
Kin	18	133	5.15.3	7	48	NA	105	6.392	3.032	13.931	1.2	34.286	NA	NA	22.916666666666668	NA	NA	NA	NA	5	S	3
Kin	18	73	5.14.3	7	49	NA	85	6.059	2.824	12.818	7.6	25.333	NA	NA	22.333333333333332	NA	NA	NA	NA	0	R	4
Kin	18	127	5.13.3	7	50	NA	90	5.954	2.982	13.121	7.7	27.599	NA	NA	21.5	NA	NA	NA	NA	15	S	7
Kin	18	85	5.12.3	7	51	NA	115	6.188	3.106	14.262	8.2	32.157	NA	NA	19.833333333333332	NA	NA	NA	NA	20	S	4
Kin	18	140	5.11.3	7	52	NA	95	6.435	3.086	14.871	8.7	35.081	NA	NA	21.333333333333332	NA	NA	NA	NA	0	R	4
Kin	18	122	5.10.3	7	53	NA	100	6.148	3.146	14.449	7.4	34.742	NA	NA	19.4	NA	NA	NA	NA	0	R	4
Kin	18	116	5.9.3	7	54	NA	90	6.179	3.06	14.142	10.1	31.464	NA	NA	21.333333333333332	NA	NA	NA	NA	0	R	6
Kin	18	92	5.8.3	7	55	NA	95	6.173	3.056	14	9.1	31.164	NA	NA	20.666666666666668	NA	NA	NA	NA	0	R	4
Kin	18	101	5.7.3	7	56	NA	90	6.324	3.234	15.275	10.1	37.687	NA	NA	21.333333333333332	NA	NA	NA	NA	10	S	7
Kin	18	128	5.6.3	7	57	NA	100	6.055	2.821	12.551	6.9	25.368	NA	NA	20	NA	NA	NA	NA	10	S	4
Kin	18	96	5.5.3	7	58	NA	115	6.091	2.996	13.47	8.2	30.037	NA	NA	22.166666666666668	NA	NA	NA	NA	15	S	2
Kin	18	112	5.4.3	7	59	NA	115	5.926	2.868	12.675	7.4	28.03	NA	NA	19	NA	NA	NA	NA	20	S	4
Kin	18	98	5.3.3	7	60	NA	95	6.097	3.013	13.282	7.7	29.845	NA	NA	17.833333333333332	NA	NA	NA	NA	0	R	4
Kin	18	77	5.2.3	7	61	NA	100	6.122	2.883	13.26	6.4	29.358	NA	NA	22.5	NA	NA	NA	NA	30	S	4
Kin	18	LA95135	5.1.3	7	62	NA	115	5.779	2.639	11.377	5.7	22.53	NA	NA	19.5	NA	NA	NA	NA	0	R	4
Kin	18	216	4.20.3	7	64	NA	85	6.151	2.805	12.453	2.9000000000000004	25.1665	NA	NA	22.416666666666668	NA	NA	NA	NA	40	S	3
Kin	18	192	4.19.3	7	65	NA	95	6.219	2.824	12.733	5.6	24.348	NA	NA	17.5	NA	NA	NA	NA	20	S	4
Kin	18	157	4.18.3	7	66	NA	100	6.234	3.089	13.928	7.5	30.738	NA	NA	19.8	NA	NA	NA	NA	0	R	2
Kin	18	196	4.17.3	7	67	NA	95	6.037	2.869	12.759	7.8	23.636	NA	NA	21.833333333333332	NA	NA	NA	NA	20	S	6
Kin	18	176	4.16.3	7	68	NA	90	5.825	2.76	11.835	8.6	21.995	NA	NA	24.833333333333332	NA	NA	NA	NA	40	S	3
Kin	18	180	4.15.3	7	69	NA	120	5.675	3.096	12.821	8.4	31.227	NA	NA	19.333333333333332	NA	NA	NA	NA	30	S	3
Kin	18	197	4.14.3	7	70	NA	100	6.822	3.129	15.471	8.8	34.783	NA	NA	19.5	NA	NA	NA	NA	0	R	2
Kin	18	190	4.13.3	7	71	NA	100	5.881	3.039	13.149	9.4	32.082	NA	NA	22	NA	NA	NA	NA	40	S	7
Kin	18	203	4.12.3	7	72	NA	100	5.77	2.817	11.721	5.7	26.147	NA	NA	21	NA	NA	NA	NA	30	S	4
Kin	18	LA95135	4.11.3	7	73	NA	105	6.373	3.174	14.766	8.7	35.51	NA	NA	18	NA	NA	NA	NA	0	R	4
Kin	18	195	4.10.3	7	74	NA	110	5.894	2.633	11.275	3.9	17.727	NA	NA	19.833333333333332	NA	NA	NA	NA	0	R	6
Kin	18	179	4.9.3	7	75	NA	110	6.437	3.054	14.207	9.5	32.759	NA	NA	22.8	NA	NA	NA	NA	20	S	2
Kin	18	205	4.8.3	7	76	NA	105	5.766	3.097	13.28	8.9	31.01	NA	NA	21	NA	NA	NA	NA	10	S	6
Kin	18	MPV57	4.7.3	7	77	NA	100	6.137	2.904	12.976	8.5	27.244	NA	NA	22.333333333333332	NA	NA	NA	NA	10	S	2
Kin	18	208	4.6.3	7	78	NA	120	6.201	2.962	13.692	9.9	27.887	NA	NA	23.166666666666668	NA	NA	NA	NA	40	S	3
Kin	18	154	4.5.3	7	79	NA	105	6.085	3.0389999999999997	13.4695	9	29.857	NA	NA	21.166666666666668	NA	NA	NA	NA	40	S	6
Kin	18	174	4.4.3	7	80	NA	75	6.329	2.932	13.53	8.5	27.597	NA	NA	20.333333333333332	NA	NA	NA	NA	0	R	7
Kin	18	206	4.3.3	7	81	NA	85	6.156	2.808	12.497	5.6	24.561	NA	NA	19.833333333333332	NA	NA	NA	NA	0	R	7
Kin	18	177	4.2.3	7	82	NA	95	5.875	2.857	12.513	7.3	24.579	NA	NA	24	NA	NA	NA	NA	10	S	3
Kin	18	LA95135	4.1.3	7	83	NA	100	6.386	3.082	14.291	8.6	31.734	NA	NA	17.833333333333332	NA	NA	NA	NA	0	R	4
Kin	18	231	3.20.3	7	85	NA	85	6.044	2.87	12.768	8.6	25.672	NA	NA	21	NA	NA	NA	NA	40	S	6
Kin	18	255	3.19.3	7	86	NA	80	6.054	2.931	12.869	9.3	26.42	NA	NA	20	NA	NA	NA	NA	0	R	6
Kin	18	250	3.18.3	7	87	NA	100	6.04	2.841	12.693	9.7	25.594	NA	NA	22.666666666666668	NA	NA	NA	NA	20	S	4
Kin	18	225	3.17.3	7	88	NA	80	6.503	2.87	13.613	9.3	27.844	NA	NA	21	NA	NA	NA	NA	0	R	5
Kin	18	261	3.16.3	7	89	NA	95	6.047	3.119	13.945	9.3	30.492	NA	NA	19.5	NA	NA	NA	NA	20	S	4
Kin	18	275	3.15.3	7	90	NA	95	5.986	2.808	12.487	7.7	25.163	NA	NA	20.5	NA	NA	NA	NA	40	S	6
Kin	18	LA95135	3.14.3	7	91	NA	95	6.506	3.134	14.958	10.6	31.832	NA	NA	18.666666666666668	NA	NA	NA	NA	0	R	6
Kin	18	281	3.13.3	7	92	NA	90	6.194	2.757	12.654	9.4	24.165	NA	NA	19.333333333333332	NA	NA	NA	NA	0	R	7
Kin	18	272	3.12.3	7	93	NA	85	6.319	2.904	13.521	7.9	25.321	NA	NA	19	NA	NA	NA	NA	0	R	6
Kin	18	248	3.11.3	7	94	NA	95	6.599	2.936	14.467	10.5	28.846	NA	NA	20.5	NA	NA	NA	NA	0	R	3
Kin	18	276	3.10.3	7	95	NA	90	5.521	2.71	11.028	4.7	20.982	NA	NA	17.333333333333332	NA	NA	NA	NA	40	S	5
Kin	18	252	3.9.3	7	96	NA	80	6.0255	2.739	12.142	4.2	19.114	NA	NA	23.333333333333332	NA	NA	NA	NA	40	S	6
Kin	18	285	3.8.3	7	97	NA	85	6.161	2.729	12.221	7.6	21.902	NA	NA	20.5	NA	NA	NA	NA	30	S	5
Kin	18	238	3.7.3	7	98	NA	90	6.547	2.953	14.602	9.3	26.124	NA	NA	21.333333333333332	NA	NA	NA	NA	0	R	3
Kin	18	282	3.6.3	7	99	NA	85	6.699	3.179	15.49	8.8	34.241	NA	NA	17.833333333333332	NA	NA	NA	NA	0	R	6
Kin	18	242	3.5.3	7	100	NA	90	6.098	2.909	13.148	7.5	22.936	NA	NA	19.833333333333332	NA	NA	NA	NA	20	S	8
Kin	18	266	3.4.3	7	101	NA	75	6.642	2.943	14.353	8.8	25.071	NA	NA	20	NA	NA	NA	NA	0	R	4
Kin	18	235	3.3.3	7	102	NA	95	6.258	2.701	12.264	1.1	24.444	NA	NA	21	NA	NA	NA	NA	0	R	5
Kin	18	286	3.2.3	7	103	NA	90	6.083	3.022	13.504	9.1	31.93	NA	NA	19	NA	NA	NA	NA	0	R	6
Kin	18	MPV57	3.1.3	7	104	NA	85	6.053	2.832	12.642	7.8	24.684	NA	NA	19.833333333333332	NA	NA	NA	NA	20	S	3
Kin	18	352	7.20.2	8	1	NA	90	5.842	2.938	12.756	8.8	24.242	NA	NA	21.5	NA	NA	NA	NA	20	S	5
Kin	18	330	7.19.2	8	2	NA	95	6.521	3.077	14.788	9.9	33	NA	NA	20.5	NA	NA	NA	NA	0	R	5
Kin	18	311	7.18.2	8	3	NA	90	6.165	2.896	13.179	8.9	27.385	NA	NA	21.666666666666668	NA	NA	NA	NA	10	S	6
Kin	18	329	7.17.2	8	4	NA	100	6.195	3.135	14.103	9.7	33.681	NA	NA	19.333333333333332	NA	NA	NA	NA	15	S	3
Kin	18	299	7.16.2	8	5	NA	90	6.447	3.021	14.24	9.2	31.081	NA	NA	20	NA	NA	NA	NA	0	R	4
Kin	18	MPV57	7.15.2	8	6	NA	90	6.03	2.839	12.57	7.7	27.208	NA	NA	21.5	NA	NA	NA	NA	15	S	3
Kin	18	348	7.14.2	8	7	NA	70	6.365	3.244	15.211	11	36.184	NA	NA	19.5	NA	NA	NA	NA	0	R	6
Kin	18	291	7.13.2	8	8	NA	90	6.086	3.032	13.494	6.9	31.081	NA	NA	19.166666666666668	NA	NA	NA	NA	0	R	4
Kin	18	356	7.12.2	8	9	NA	100	6.573	3.012	14.598	9.4	35.075	NA	NA	20.166666666666668	NA	NA	NA	NA	0	R	3
Kin	18	338	7.11.2	8	10	NA	110	6.286	3.121	14.44	9.8	31.511	NA	NA	22.5	NA	NA	NA	NA	15	S	6
Kin	18	310	7.10.2	8	11	NA	110	6.332	3.212	14.89	11	35.37	NA	NA	20.833333333333332	NA	NA	NA	NA	10	S	4
Kin	18	295	7.9.2	8	12	NA	80	6.36	2.985	13.96	8.9	30.068	NA	NA	20.666666666666668	NA	NA	NA	NA	25	S	7
Kin	18	326	7.8.2	8	13	NA	115	6.483	3.157	15.095	11	35.144	NA	NA	21.333333333333332	NA	NA	NA	NA	0	R	2
Kin	18	292	7.7.2	8	14	NA	110	6.333	3.085	14.269	9.8	32.776	NA	NA	19	NA	NA	NA	NA	15	S	3
Kin	18	313	7.6.2	8	15	NA	100	6.627	3.091	15.023	10.3	33.882	NA	NA	22.166666666666668	NA	NA	NA	NA	0	R	3
Kin	18	294	7.5.2	8	16	NA	90	6.157	2.975	13.434	7.7	31.687	NA	NA	18.833333333333332	NA	NA	NA	NA	0	R	5
Kin	18	325	7.4.2	8	17	NA	90	6.462	2.985	14.245	6.6	30.986	NA	NA	15.833333333333334	NA	NA	NA	NA	0	R	7
Kin	18	307	7.3.2	8	18	NA	85	6.303	2.857	13.402	8.8	27.245	NA	NA	21.333333333333332	NA	NA	NA	NA	10	S	7
Kin	18	312	7.2.2	8	19	NA	70	6.296	3.009	13.921	9.1	30.132	NA	NA	20.666666666666668	NA	NA	NA	NA	0	R	6
Kin	18	LA95135	7.1.2	8	20	NA	100	6.547	3.34	16.094	11.8	39.597	NA	NA	18.333333333333332	NA	NA	NA	NA	0	R	6
Kin	18	45	6.20.2	8	22	NA	90	6.474	3.127	15.088	9.6	35.556	NA	NA	20.5	NA	NA	NA	NA	20	S	5
Kin	18	48	6.19.2	8	23	NA	95	6.28	3.286	15.401	9	34.884	NA	NA	18.166666666666668	NA	NA	NA	NA	0	R	5
Kin	18	71	6.18.2	8	24	NA	90	5.867	3.163	13.92	9.6	30.094	NA	NA	21.333333333333332	NA	NA	NA	NA	5	S	6
Kin	18	35	6.17.2	8	25	NA	95	6.449	3.037	14.503	9.1	32.616	NA	NA	19.333333333333332	NA	NA	NA	NA	10	S	4
Kin	18	38	6.16.2	8	26	NA	85	6.373	3.191	14.963	8.3	37.727	NA	NA	17.5	NA	NA	NA	NA	30	S	7
Kin	18	46	6.15.2	8	27	NA	110	6.665	3.123	15.277	9.3	35.769	NA	NA	19.666666666666668	NA	NA	NA	NA	0	R	6
Kin	18	33	6.14.2	8	28	NA	100	6.388	2.955	14.056	8.4	29.167	NA	NA	17.666666666666668	NA	NA	NA	NA	5	S	5
Kin	18	4	6.13.2	8	29	NA	70	6.416	2.887	13.634	7.2	29.15	NA	NA	18.5	NA	NA	NA	NA	30	S	7
Kin	18	67	6.12.2	8	30	NA	100	6.26	3.102	14.182	7.8	34.821	NA	NA	18.166666666666668	NA	NA	NA	NA	0	R	5
Kin	18	MPV57	6.11.2	8	31	NA	95	6.136	2.868	13.029	8.3	28.231	NA	NA	20.5	NA	NA	NA	NA	5	S	4
Kin	18	36	6.10.2	8	32	NA	100	6.172	2.735	12.351	4.5	25.14	NA	NA	12.833333333333334	NA	NA	NA	NA	0	R	4
Kin	18	14	6.9.2	8	33	NA	95	6.519	2.936	14.232	8.7	31.636	NA	NA	20.666666666666668	NA	NA	NA	NA	0	R	3
Kin	18	62	6.8.2	8	34	NA	95	6.215	3.022	14.035	9.7	31.392	NA	NA	20.166666666666668	NA	NA	NA	NA	0	R	5
Kin	18	19	6.7.2	8	35	NA	85	6.254	3.108	14.8	9.7	34.276	NA	NA	20.5	NA	NA	NA	NA	0	R	7
Kin	18	15	6.6.2	8	36	NA	85	5.922000000000001	2.8445	12.445	8.2	25.7055	NA	NA	20.5	NA	NA	NA	NA	0	R	6
Kin	18	18	6.5.2	8	37	NA	80	6.172	3.03	14.187	9.9	30.368	NA	NA	22.5	NA	NA	NA	NA	50	S	6
Kin	18	34	6.4.2	8	38	NA	100	6.6	2.968	14.606	8.9	32.364	NA	NA	20.666666666666668	NA	NA	NA	NA	0	R	3
Kin	18	12	6.3.2	8	39	NA	100	6.276	3.017	14.268	11.3	31.564	NA	NA	21	NA	NA	NA	NA	0	R	4
Kin	18	30	6.2.2	8	40	NA	95	6.73	3.066	15.296	12.4	34.93	NA	NA	21.833333333333332	NA	NA	NA	NA	0	R	4
Kin	18	MPV57	6.1.2	8	41	NA	95	5.892	2.777	12.293	7.3	24.333	NA	NA	20.5	NA	NA	NA	NA	20	S	3
Kin	18	91	5.20.2	8	43	NA	95	6.541	3.232	15.756	9.9	36.667	NA	NA	20.5	NA	NA	NA	NA	NA	mix	5
Kin	18	80	5.19.2	8	44	NA	95	6.511	3.088	14.944	10	32.362	NA	NA	21.166666666666668	NA	NA	NA	NA	0	R	5
Kin	18	143	5.18.2	8	45	NA	100	6.357	3.119	14.582	10.7	34.628	NA	NA	21.166666666666668	NA	NA	NA	NA	5	S	2
Kin	18	LA95135	5.17.2	8	46	NA	100	6.386	3.104	14.653	8.4	34.855	NA	NA	18.333333333333332	NA	NA	NA	NA	0	R	6
Kin	18	130	5.16.2	8	47	NA	90	6.14	2.994	13.647	8.4	30.657	NA	NA	21.833333333333332	NA	NA	NA	NA	10	S	5
Kin	18	86	5.15.2	8	48	NA	110	6.275	3.053	14.109	7.4	32.035	NA	NA	19.166666666666668	NA	NA	NA	NA	10	S	3
Kin	18	104	5.14.2	8	49	NA	82	6.289	2.912	13.386	7.2	28.916	NA	NA	20.5	NA	NA	NA	NA	0	R	7
Kin	18	119	5.13.2	8	50	NA	110	6.295	3.182	14.416	5.5	35.714	NA	NA	17.166666666666668	NA	NA	NA	NA	15	S	3
Kin	18	139	5.12.2	8	51	NA	85	5.978	2.944	13.281	8.2	29.603	NA	NA	19.666666666666668	NA	NA	NA	NA	15	S	5
Kin	18	124	5.11.2	8	52	NA	85	6.322	2.792	13.101	6.2	26.16	NA	NA	20	NA	NA	NA	NA	0	R	3
Kin	18	MPV57	5.10.2	8	53	NA	95	6.15	2.914	13.252	7.5	28.517	NA	NA	22	NA	NA	NA	NA	10	S	3
Kin	18	108	5.9.2	8	54	NA	90	6	3.052	13.716	8.2	29.391	NA	NA	21.166666666666668	NA	NA	NA	NA	5	S	4
Kin	18	103	5.8.2	8	55	NA	95	6.547	2.979	14.401	9.1	29.934	NA	NA	22.166666666666668	NA	NA	NA	NA	0	R	5
Kin	18	136	5.7.2	8	56	NA	110	6.531	3.099	14.908	9.8	33.108	NA	NA	21.333333333333332	NA	NA	NA	NA	0	R	5
Kin	18	121	5.6.2	8	57	NA	85	5.971	2.931	13.273	8.4	27.541	NA	NA	19.5	NA	NA	NA	NA	0	R	5
Kin	18	125	5.5.2	8	58	NA	85	5.765	3.021	12.839	8.2	27.609	NA	NA	20.333333333333332	NA	NA	NA	NA	30	S	4
Kin	18	76	5.4.2	8	59	NA	100	6.379	2.964	14.192	9.5	30.547	NA	NA	20.333333333333332	NA	NA	NA	NA	0	R	2
Kin	18	111	5.3.2	8	60	NA	125	6.043	2.88	12.74	8	26.756	NA	NA	22.5	NA	NA	NA	NA	30	S	3
Kin	18	99	5.2.2	8	61	NA	100	6.259	2.786	12.867	7.7	24.919	NA	NA	17	NA	NA	NA	NA	0	R	1
Kin	18	MPV57	5.1.2	8	62	NA	95	5.948	2.813	12.01	5.5	25	NA	NA	20.833333333333332	NA	NA	NA	NA	20	S	2
Kin	18	213	4.20.2	8	64	NA	115	6.774	3.122	15.487	9.9	33.904	NA	NA	19.166666666666668	NA	NA	NA	NA	30	S	3
Kin	18	MPV57	4.19.2	8	65	NA	90	5.911	2.833	12.227	5.4	23.684	NA	NA	20.6	NA	NA	NA	NA	5	S	3
Kin	18	194	4.18.2	8	66	NA	85	6.423	2.806	13.18	4.2	24.561	NA	NA	11.833333333333334	NA	NA	NA	NA	0	R	1
Kin	18	167	4.17.2	8	67	NA	95	6.5205	3.008	14.469999999999999	2.95	28.286	NA	NA	20	NA	NA	NA	NA	0	R	5
Kin	18	199	4.16.2	8	68	NA	115	6.141	2.871	12.882	7.8	24.684	NA	NA	22.666666666666668	NA	NA	NA	NA	40	S	3
Kin	18	204	4.15.2	8	69	NA	105	5.582	2.828	11.693	5.6	23.529	NA	NA	20.166666666666668	NA	NA	NA	NA	50	S	3
Kin	18	153	4.14.2	8	70	NA	90	5.971	2.833	12.262	7.1	25.357	NA	NA	20.5	NA	NA	NA	NA	30	S	1
Kin	18	215	4.13.2	8	71	NA	120	5.706	2.967	12.414	9	27.108	NA	NA	22	NA	NA	NA	NA	50	S	3
Kin	18	175	4.12.2	8	72	NA	85	6.182	2.649	11.86	5	20.921	NA	NA	20.833333333333332	NA	NA	NA	NA	0	R	6
Kin	18	191	4.11.2	8	73	NA	90	6.184	2.96	13.475	8.4	26.498	NA	NA	21.5	NA	NA	NA	NA	20	S	4
Kin	18	170	4.10.2	8	74	NA	95	5.884	2.52	10.845	2.7	16.168	NA	NA	14.166666666666666	NA	NA	NA	NA	30	S	5
Kin	18	160	4.9.2	8	75	NA	95	6.024	3.031	13.481	10.4	30.409	NA	NA	22.333333333333332	NA	NA	NA	NA	30	S	3
Kin	18	188	4.8.2	8	76	NA	110	6.169	3.066	13.863	9.2	30.565	NA	NA	21	NA	NA	NA	NA	30	S	7
Kin	18	211	4.7.2	8	77	NA	100	5.965	2.953	12.95	7.8	30.469	NA	NA	18.666666666666668	NA	NA	NA	NA	20	S	6
Kin	18	158	4.6.2	8	78	NA	100	6.599	3.142	15.138	11.2	34.251	NA	NA	22.5	NA	NA	NA	NA	0	R	2
Kin	18	210	4.5.2	8	79	NA	110	6.344	2.98	13.982	10.5	30.435	NA	NA	22.5	NA	NA	NA	NA	40	S	4
Kin	18	161	4.4.2	8	80	NA	80	6.146	2.857	12.889	8.3	25.382	NA	NA	22.5	NA	NA	NA	NA	20	S	5
Kin	18	173	4.3.2	8	81	NA	120	5.761	3.108	13.397	9.7	31.09	NA	NA	21.666666666666668	NA	NA	NA	NA	0	R	4
Kin	18	169	4.2.2	8	82	NA	95	6.481	2.985	14.395	9	27.273	NA	NA	21.166666666666668	NA	NA	NA	NA	0	R	3
Kin	18	MPV57	4.1.2	8	83	NA	95	6.032	2.934	12.923	8.1	26.821	NA	NA	21	NA	NA	NA	NA	10	S	3
Kin	18	273	3.20.2	8	85	NA	100	6.748	3.049	15.223	9.5	33.929	NA	NA	20.166666666666668	NA	NA	NA	NA	0	R	3
Kin	18	240	3.19.2	8	86	NA	80	6.229	2.776	12.844	9	22.556	NA	NA	22.666666666666668	NA	NA	NA	NA	40	S	5
Kin	18	229	3.18.2	8	87	NA	80	6.529	2.91	14.003	8.7	27.885	NA	NA	19.166666666666668	NA	NA	NA	NA	0	R	6
Kin	18	279	3.17.2	8	88	NA	95	6.243	3.117	14.283	8.7	30.851	NA	NA	17.666666666666668	NA	NA	NA	NA	20	S	4
Kin	18	251	3.16.2	8	89	NA	90	5.997	2.9	12.915	7.8	26.99	NA	NA	19	NA	NA	NA	NA	10	S	4
Kin	18	243	3.15.2	8	90	NA	80	6.116	2.824	12.757	7.9	24.765	NA	NA	18.333333333333332	NA	NA	NA	NA	40	S	5
Kin	18	263	3.14.2	8	91	NA	95	6.125	3.066	13.904	8.5	30.142	NA	NA	19.833333333333332	NA	NA	NA	NA	5	S	5
Kin	18	227	3.13.2	8	92	NA	95	6.654	3.043	14.998	8.7	31.295	NA	NA	17.5	NA	NA	NA	NA	0	R	3
Kin	18	262	3.12.2	8	93	NA	105	6.251	2.996	13.76	8.3	29.433	NA	NA	19.166666666666668	NA	NA	NA	NA	0	R	4
Kin	18	237	3.11.2	8	94	NA	95	6.008	2.967	13.155	8.8	29.932	NA	NA	17.333333333333332	NA	NA	NA	NA	0	R	4
Kin	18	264	3.10.2	8	95	NA	65	6.28	2.857	13.225	6.1	25.311	NA	NA	16.333333333333332	NA	NA	NA	NA	20	S	7
Kin	18	226	3.9.2	8	96	NA	80	6.59	2.97	14.41	8.3	26.101	NA	NA	20.666666666666668	NA	NA	NA	NA	0	R	4
Kin	18	270	3.8.2	8	97	NA	85	6.693	2.811	13.846	7.5	24.752	NA	NA	18.666666666666668	NA	NA	NA	NA	30	S	NA
Kin	18	MPV57	3.7.2	8	98	NA	90	6.074	2.805	12.626	8.6	24.157	NA	NA	21.666666666666668	NA	NA	NA	NA	20	S	4
Kin	18	249	3.6.2	8	99	NA	80	6.369	2.926	13.886	9.8	27.528	NA	NA	19.666666666666668	NA	NA	NA	NA	0	R	5
Kin	18	256	3.5.2	8	100	NA	105	5.801	2.865	12.21	8.9	24.518	NA	NA	21.166666666666668	NA	NA	NA	NA	40	S	5
Kin	18	234	3.4.2	8	101	NA	95	6.336	2.84	13.324	9.9	25.255	NA	NA	21.833333333333332	NA	NA	NA	NA	0	R	3
Kin	18	260	3.3.2	8	102	NA	90	NA	NA	NA	NA	NA	NA	NA	21.333333333333332	NA	NA	NA	NA	0	R	5
Kin	18	274	3.2.2	8	103	NA	110	6.4	3.185	15.186	11.2	35.443	NA	NA	19.833333333333332	NA	NA	NA	NA	0	R	4
Kin	18	LA95135	3.1.2	8	104	NA	95	6.435	3.108	14.646	8.2	34.167	NA	NA	16.333333333333332	NA	NA	NA	NA	0	R	4
Kin	18	357	7.20.1	9	1	NA	95	6.389	3.012	14.009	7.5	28.846	NA	NA	17	NA	NA	NA	NA	0	R	5
Kin	18	290	7.19.1	9	2	NA	95	5.982	2.922	12.905	8.8	26.829	NA	NA	21.666666666666668	NA	NA	NA	NA	5	S	6
Kin	18	LA95135	7.18.1	9	3	NA	100	6.507	3.132	15.071	10.8	34.615	NA	NA	19.166666666666668	NA	NA	NA	NA	0	R	5
Kin	18	MPV57	7.17.1	9	4	NA	95	6.059	2.897	13.025	9.4	28.06	NA	NA	22.5	NA	NA	NA	NA	20	S	2
Kin	18	358	7.16.1	9	5	NA	100	6.535	3.061	14.948	10.3	32.288	NA	NA	20.5	NA	NA	NA	NA	0	R	3
Kin	18	347	7.15.1	9	6	NA	95	5.91	2.988	13.136	9.5	27.221	NA	NA	23	NA	NA	NA	NA	20	S	5
Kin	18	LA95135	7.14.1	9	7	NA	105	6.378	3.227	15.152	9.6	35.556	NA	NA	18.666666666666668	NA	NA	NA	NA	0	R	6
Kin	18	315	7.13.1	9	8	NA	110	5.875	3.048	13.381	9.8	29.787	NA	NA	21.666666666666668	NA	NA	NA	NA	40	S	3
Kin	18	321	7.12.1	9	9	NA	105	6.232	3.158	14.323	9.4	32.302	NA	NA	21.5	NA	NA	NA	NA	15	S	3
Kin	18	308	7.11.1	9	10	NA	105	5.785	2.762	11.718	7.5	25	NA	NA	20.833333333333332	NA	NA	NA	NA	5	S	4
Kin	18	345	7.10.1	9	11	NA	105	6.088	2.981	13.509	8	28.169	NA	NA	19.333333333333332	NA	NA	NA	NA	0	R	5
Kin	18	324	7.9.1	9	12	NA	110	6.743	3.153	15.740499999999999	11.4	37.114000000000004	NA	NA	20.583333333333332	NA	NA	NA	NA	0	R	3
Kin	18	344	7.8.1	9	13	NA	90	6.698	3.037	14.968	9.7	34.155	NA	NA	19.833333333333332	NA	NA	NA	NA	5	S	3
Kin	18	334	7.7.1	9	14	NA	80	6.123	2.883	13.097	9.3	26.879	NA	NA	20	NA	NA	NA	NA	20	S	8
Kin	18	339	7.6.1	9	15	NA	95	6.398	3.105	14.816	10.9	34.713	NA	NA	20.833333333333332	NA	NA	NA	NA	20	S	6
Kin	18	314	7.5.1	9	16	NA	110	6.398	3.302	15.802	12.2	39.103	NA	NA	20.666666666666668	NA	NA	NA	NA	0	R	3
Kin	18	297	7.4.1	9	17	NA	95	6.728	3.09	15.231	10.2	33.553	NA	NA	22.333333333333332	NA	NA	NA	NA	0	R	6
Kin	18	354	7.3.1	9	18	NA	110	5.991	3.001	13.249	10.6	28.495	NA	NA	21.5	NA	NA	NA	NA	20	S	4
Kin	18	306	7.2.1	9	19	NA	80	6.498	2.941	13.873	9.1	30.847	NA	NA	20.666666666666668	NA	NA	NA	NA	20	S	5
Kin	18	68	6.20.1	9	22	NA	80	6.555	3.288	16.097	11.4	36.19	NA	NA	21.666666666666668	NA	NA	NA	NA	30	S	8
Kin	18	58	6.19.1	9	23	NA	100	6.851	3.164	16.009	10.9	35.974	NA	NA	20.833333333333332	NA	NA	NA	NA	0	R	4
Kin	18	LA95135	6.18.1	9	24	NA	100	6.65	3.283	16.297	11.2	38.889	NA	NA	18.666666666666668	NA	NA	NA	NA	0	R	5
Kin	18	22	6.17.1	9	25	NA	90	6.149	2.878	12.962	7.8	25.574	NA	NA	20	NA	NA	NA	NA	30	S	6
Kin	18	43	6.16.1	9	26	NA	100	6.301	3.058	14.594	10	28.986	NA	NA	21.666666666666668	NA	NA	NA	NA	45	S	4
Kin	18	20	6.15.1	9	27	NA	95	6.334	2.937	13.897	8.9	25.07	NA	NA	21.666666666666668	NA	NA	NA	NA	50	S	7
Kin	18	26	6.14.1	9	28	NA	105	6.512	3.129	15.227	10.5	33.546	NA	NA	20.166666666666668	NA	NA	NA	NA	0	R	4
Kin	18	70	6.13.1	9	29	NA	80	6.29	2.884	13.519	8.9	25.575	NA	NA	23.5	NA	NA	NA	NA	40	S	7
Kin	18	16	6.12.1	9	30	NA	110	6.394	3.068	14.445	10.2	33.887	NA	NA	18.666666666666668	NA	NA	NA	NA	0	R	5
Kin	18	53	6.11.1	9	31	NA	105	6.045	2.924	13.227	8	27.397	NA	NA	19	NA	NA	NA	NA	10	S	5
Kin	18	17	6.10.1	9	32	NA	100	6.456	3.139	15.198	10.6	34.194	NA	NA	20.5	NA	NA	NA	NA	0	R	4
Kin	18	25	6.9.1	9	33	NA	95	6.039	2.876	12.901	7.5	27.675	NA	NA	18.166666666666668	NA	NA	NA	NA	0	R	7
Kin	18	10	6.8.1	9	34	NA	90	5.614	2.762	11.609	8.1	22.946	NA	NA	21	NA	NA	NA	NA	20	S	7
Kin	18	61	6.7.1	9	35	NA	95	5.949	2.952	13.389	9.8	27.762	NA	NA	22.166666666666668	NA	NA	NA	NA	5	S	3
Kin	18	9	6.6.1	9	36	NA	90	6.126	2.781	12.848	9	25	NA	NA	23	NA	NA	NA	NA	10	S	7
Kin	18	49	6.5.1	9	37	NA	115	6.314	3.117	14.678	10.7	34.516	NA	NA	20.833333333333332	NA	NA	NA	NA	0	R	3
Kin	18	7	6.4.1	9	38	NA	90	6.336	2.847	13.88	8	28.269	NA	NA	20.5	NA	NA	NA	NA	40	S	7
Kin	18	39	6.3.1	9	39	NA	105	6.389	2.781	13.41	8	28.47	NA	NA	19.333333333333332	NA	NA	NA	NA	0	R	2
Kin	18	2	6.2.1	9	40	NA	95	6.148	3.065	14.299	9.7	33.798	NA	NA	22.333333333333332	NA	NA	NA	NA	15	S	4
Kin	18	115	5.20.1	9	43	NA	115	NA	NA	NA	NA	NA	NA	NA	20.5	NA	NA	NA	NA	50	S	3
Kin	18	144	5.19.1	9	44	NA	120	6.222	3.017	14.18	10.6	32.817	NA	NA	23	NA	NA	NA	NA	40	S	1
Kin	18	107	5.18.1	9	45	NA	120	6.498	3.057	15.035	11.1	35.016	NA	NA	20.166666666666668	NA	NA	NA	NA	0	R	1
Kin	18	134	5.17.1	9	46	NA	100	5.907	2.76	11.882	6.7	22.635	NA	NA	19.833333333333332	NA	NA	NA	NA	40	S	5
Kin	18	100	5.16.1	9	47	NA	95	6.373	2.964	13.941	7.9	31.984	NA	NA	17	NA	NA	NA	NA	0	R	7
Kin	18	132	5.15.1	9	48	NA	115	6.033	3.074	13.874	10.1	31.173	NA	NA	20	NA	NA	NA	NA	0	R	3
Kin	18	141	5.14.1	9	49	NA	115	NA	NA	NA	NA	NA	NA	NA	19.666666666666668	NA	NA	NA	NA	0	R	2
Kin	18	84	5.13.1	9	50	NA	100	6.206	3.108	14.12	9.7	32.881	NA	NA	19.666666666666668	NA	NA	NA	NA	0	R	3
Kin	18	89	5.12.1	9	51	NA	100	5.838	2.807	12.379	7.5	23.364	NA	NA	21.166666666666668	NA	NA	NA	NA	10	S	5
Kin	18	95	5.11.1	9	52	NA	90	6.3	2.9	13.607	9.8	27.762	NA	NA	22.833333333333332	NA	NA	NA	NA	25	S	4
Kin	18	114	5.10.1	9	53	NA	90	5.89	2.903	12.627	9.1	27.744	NA	NA	20.666666666666668	NA	NA	NA	NA	15	S	8
Kin	18	137	5.9.1	9	54	NA	120	5.957	2.982	13.249	11.5	30.504	NA	NA	23.833333333333332	NA	NA	NA	NA	0	R	3
Kin	18	138	5.8.1	9	55	NA	95	6.012	3.032	13.693	9.3	30.195	NA	NA	20.5	NA	NA	NA	NA	0	R	3
Kin	18	75	5.7.1	9	56	NA	95	6.368	2.942	14.215	9.3	27.679	NA	NA	21.333333333333332	NA	NA	NA	NA	0	R	5
Kin	18	106	5.6.1	9	57	NA	115	6.003	2.682	11.824	5.4	23.478	NA	NA	17.333333333333332	NA	NA	NA	NA	0	R	2
Kin	18	94	5.5.1	9	58	NA	125	6.346	2.8845	13.1395	1.95	28.3365	NA	NA	20.166666666666668	NA	NA	NA	NA	5	S	3
Kin	18	117	5.4.1	9	59	NA	95	6.502	3.105	15.11	10.9	32.344	NA	NA	20.166666666666668	NA	NA	NA	NA	0	R	4
Kin	18	79	5.3.1	9	60	NA	110	6.048	2.889	12.8	8.1	27	NA	NA	21.666666666666668	NA	NA	NA	NA	50	S	2
Kin	18	83	5.2.1	9	61	NA	100	6.07	2.992	13.646	8.8	29.63	NA	NA	20.5	NA	NA	NA	NA	0	R	3
Kin	18	150	4.20.1	9	64	NA	90	6.167	2.738	12.392	6.4	25	NA	NA	20.333333333333332	NA	NA	NA	NA	5	S	4
Kin	18	185	4.19.1	9	65	NA	105	6.481	2.95	14.326	7.7	32.627	NA	NA	18.5	NA	NA	NA	NA	0	R	3
Kin	18	182	4.18.1	9	66	NA	125	6.414	3.103	14.41	6.9	31.944	NA	NA	19.666666666666668	NA	NA	NA	NA	0	R	3
Kin	18	209	4.17.1	9	67	NA	95	6.826	2.94	14.996	8.5	28.053	NA	NA	21	NA	NA	NA	NA	0	R	3
Kin	18	147	4.16.1	9	68	NA	105	5.859	2.763	11.878	7.1	21.914	NA	NA	20.5	NA	NA	NA	NA	40	S	2
Kin	18	184	4.15.1	9	69	NA	100	6.012	2.865	12.452	7.3	23.779	NA	NA	20.5	NA	NA	NA	NA	50	S	2
Kin	18	207	4.14.1	9	70	NA	85	6.069	2.723	11.932	6.9	21.037	NA	NA	21.666666666666668	NA	NA	NA	NA	20	S	2
Kin	18	172	4.13.1	9	71	NA	115	6.401	2.972	14.017	9.5	28.19	NA	NA	21.833333333333332	NA	NA	NA	NA	5	S	3
Kin	18	155	4.12.1	9	72	NA	95	5.756	2.95	12.58	8.4	24.779	NA	NA	22.166666666666668	NA	NA	NA	NA	20	S	6
Kin	18	181	4.11.1	9	73	NA	95	6.084	2.865	12.877	8.1	26.645	NA	NA	21.666666666666668	NA	NA	NA	NA	5	S	5
Kin	18	202	4.10.1	9	74	NA	110	6.663	3.179	15.789	10	36.232	NA	NA	19.833333333333332	NA	NA	NA	NA	0	R	2
Kin	18	200	4.9.1	9	75	NA	100	6.243	2.874	13.199	6.3	27.391	NA	NA	18.8	NA	NA	NA	NA	0	R	2
Kin	18	148	4.8.1	9	76	NA	100	6.268	2.745	12.621	7.8	23.145	NA	NA	21.333333333333332	NA	NA	NA	NA	50	S	4
Kin	18	187	4.7.1	9	77	NA	105	6.03	2.989	13.226	8.7	28.904	NA	NA	22.166666666666668	NA	NA	NA	NA	0	R	4
Kin	18	214	4.6.1	9	78	NA	115	5.999	2.966	13.111	9.3	28.615	NA	NA	20	NA	NA	NA	NA	60	S	2
Kin	18	166	4.5.1	9	79	NA	105	6.406	3.054	14.13	8.6	30.935	NA	NA	19.833333333333332	NA	NA	NA	NA	0	R	4
Kin	18	212	4.4.1	9	80	NA	100	5.964	3.132	13.568	8.9	31.449	NA	NA	20	NA	NA	NA	NA	40	S	6
Kin	18	LA95135	4.3.1	9	81	NA	115	6.513	3.181	15.306	10.8	35.526	NA	NA	19.5	NA	NA	NA	NA	0	R	4
Kin	18	156	4.2.1	9	82	NA	120	6.15	2.729	11.945	8	23.392	NA	NA	20.833333333333332	NA	NA	NA	NA	NA	mix	5
Kin	18	218	3.20.1	9	85	NA	105	6.085	2.825	12.625	10.3	25.686	NA	NA	22.333333333333332	NA	NA	NA	NA	40	S	4
Kin	18	280	3.19.1	9	86	NA	65	6.039	2.529	11.245	5	16.892	NA	NA	17.5	NA	NA	NA	NA	40	S	8
Kin	18	271	3.18.1	9	87	NA	90	6.762	2.941	14.869	10.8	26.536	NA	NA	22	NA	NA	NA	NA	0	R	4
Kin	18	233	3.17.1	9	88	NA	80	6.133	2.822	12.586	9.5	24.051	NA	NA	20	NA	NA	NA	NA	30	S	5
Kin	18	217	3.16.1	9	89	NA	110	6.662	3.092	15.116	9.9	34.138	NA	NA	18.333333333333332	NA	NA	NA	NA	0	R	3
Kin	18	254	3.15.1	9	90	NA	80	6.327	2.7775	12.5775	0.6	22.979999999999997	NA	NA	20.416666666666668	NA	NA	NA	NA	0	R	2
Kin	18	222	3.14.1	9	91	NA	115	6.049	3.004	13.491	10.5	28	NA	NA	20	NA	NA	NA	NA	5	S	5
Kin	18	269	3.13.1	9	92	NA	105	6.0745000000000005	2.7305	12.205	8.649999999999999	22.493499999999997	NA	NA	21.75	NA	NA	NA	NA	30	S	3
Kin	18	223	3.12.1	9	93	NA	100	6.031	2.7	12.035	6.8	22.295	NA	NA	20.833333333333332	NA	NA	NA	NA	0	R	5
Kin	18	277	3.11.1	9	94	NA	80	6.339	2.589	12.001	5.3	19.343	NA	NA	17.833333333333332	NA	NA	NA	NA	30	S	5
Kin	18	246	3.10.1	9	95	NA	90	5.733	2.77	11.809	9	23.438	NA	NA	21.333333333333332	NA	NA	NA	NA	5	S	6
Kin	18	288	3.9.1	9	96	NA	95	5.973	2.73	11.972	8	20.725	NA	NA	20.833333333333332	NA	NA	NA	NA	20	S	5
Kin	18	247	3.8.1	9	97	NA	95	5.783	2.752	11.752	7.2	23.684	NA	NA	17.833333333333332	NA	NA	NA	NA	30	S	6
Kin	18	253	3.7.1	9	98	NA	105	6.107	2.951	13.053	7.4	28.682	NA	NA	17.5	NA	NA	NA	NA	0	R	5
Kin	18	283	3.6.1	9	99	NA	90	6.401	3.039	14.416	11	30.726	NA	NA	20.833333333333332	NA	NA	NA	NA	0	R	4
Kin	18	232	3.5.1	9	100	NA	90	6.095	2.804	12.338	5.8	25.328	NA	NA	15	NA	NA	NA	NA	20	S	5
Kin	18	258	3.4.1	9	101	NA	90	6.733	2.951	14.842	8.9	24.722	NA	NA	20.5	NA	NA	NA	NA	0	R	6
Kin	18	220	3.3.1	9	102	NA	105	6.798	2.974	14.847	8.7	32.103	NA	NA	19	NA	NA	NA	NA	0	R	5
Kin	18	236	3.2.1	9	103	NA	105	6.45	3.119	14.717	10	31.25	NA	NA	20.833333333333332	NA	NA	NA	NA	30	S	4
Kin	18	245	8.2.1	16	2	NA	105	5.815	2.962	12.857	10.6	26.108	NA	NA	23.666666666666668	NA	NA	NA	NA	5	S	7
Kin	18	282	8.3.1	16	3	NA	90	6.509	3.178	15.225	9	38.136	NA	NA	17.666666666666668	NA	NA	NA	NA	0	R	7
Kin	18	LA95135	8.4.1	16	4	NA	105	6.433	3.136	15.036	11.7	34.821	NA	NA	20	NA	NA	NA	NA	0	R	7
Kin	18	285	8.5.1	16	5	NA	85	6.17	2.832	12.92	10.5	25.18	NA	NA	23	NA	NA	NA	NA	25	S	7
Kin	18	221	8.6.1	16	6	NA	80	5.996	2.998	13.527	8.6	28.105	NA	NA	21.5	NA	NA	NA	NA	25	S	9
Kin	18	278	8.7.1	16	7	NA	80	5.781	2.794	12.078	6.4	24.242	NA	NA	18.166666666666668	NA	NA	NA	NA	0	R	7
Kin	18	260	8.8.1	16	8	NA	95	5.859500000000001	3.1574999999999998	13.7655	10.3	32.8675	NA	NA	21.818181818181817	NA	NA	NA	NA	0	R	7
Kin	18	LA95135	8.9.1	16	9	NA	105	6.296	3.154	14.773	9.2	36.078	NA	NA	19	NA	NA	NA	NA	0	R	7
Kin	18	268	8.10.1	16	10	NA	90	5.905	3.089	13.656	10.5	30.435	NA	NA	23.166666666666668	NA	NA	NA	NA	0	R	8
Kin	18	228	8.11.1	16	11	NA	100	6.18	3.042	13.919	9.1	29.642	NA	NA	21.5	NA	NA	NA	NA	25	S	7
Kin	18	261	8.12.1	16	12	NA	95	5.759	2.773	11.693	4.8	24.121	NA	NA	16.333333333333332	NA	NA	NA	NA	30	S	7
Kin	18	274	8.13.1	16	13	NA	105	6.323	3.256	15.17	8.9	33.333	NA	NA	19.833333333333332	NA	NA	NA	NA	0	R	6
Kin	18	225	8.14.1	16	14	NA	90	6.585	3.036	14.743	11.5	32.486	NA	NA	22.5	NA	NA	NA	NA	0	R	7
Kin	18	276	8.15.1	16	15	NA	80	5.783	2.911	12.313	7.5	28.626	NA	NA	19.166666666666668	NA	NA	NA	NA	50	S	8
Kin	18	270	8.16.1	16	16	NA	100	6.797	2.952	14.529	7.6	29.231	NA	NA	20.833333333333332	NA	NA	NA	NA	50	S	7
Kin	18	257	8.17.1	16	17	NA	85	6.478	2.848	13.527	6.1	26.068	NA	NA	16.166666666666668	NA	NA	NA	NA	0	R	3
Kin	18	227	8.18.1	16	18	NA	105	6.689	3.085	15.183	10.7	34.74	NA	NA	20	NA	NA	NA	NA	0	R	3
Kin	18	246	8.19.1	16	19	NA	105	5.946	3.125	13.843	13.4	31.235	NA	NA	24	NA	NA	NA	NA	5	S	6
Kin	18	223	8.20.1	16	20	NA	105	6.12	2.824	12.796	8.6	24.928	NA	NA	23.333333333333332	NA	NA	NA	NA	0	R	5
Kin	18	107	9.2.1	16	23	NA	115	6.5	2.996	14.512	9.5	33.569	NA	NA	18.333333333333332	NA	NA	NA	NA	0	R	3
Kin	18	82	9.3.1	16	24	NA	105	6.519500000000001	3.0965	15.130500000000001	10.850000000000001	34.655	NA	NA	21.5	NA	NA	NA	NA	0	R	6
Kin	18	87	9.4.1	16	25	NA	75	6.208	2.796	12.725	7	22.654	NA	NA	23.166666666666668	NA	NA	NA	NA	60	S	9
Kin	18	120	9.5.1	16	26	NA	105	6.753	3.257	16.085	12.2	40.397	NA	NA	20.5	NA	NA	NA	NA	0	R	3
Kin	18	97	9.6.1	16	27	NA	110	6.342	2.975	13.972	9.9	32.039	NA	NA	22.5	NA	NA	NA	NA	50	S	4
Kin	18	127	9.7.1	16	28	NA	90	5.797	2.912	12.53	9	24.793	NA	NA	23.833333333333332	NA	NA	NA	NA	30	S	8
Kin	18	MPV57	9.8.1	16	29	NA	100	6.091	2.863	12.948	11.3	27.97	NA	NA	23.166666666666668	NA	NA	NA	NA	10	S	2
Kin	18	113	9.9.1	16	30	NA	85	6.333	2.9585	13.632	1.05	33.908	NA	NA	18.833333333333332	NA	NA	NA	NA	40	S	7
Kin	18	77	9.10.1	16	31	NA	100	5.759	3.075	13.124	10.6	30.199	NA	NA	23.166666666666668	NA	NA	NA	NA	15	S	6
Kin	18	125	9.11.1	16	32	NA	80	5.583	2.761	11.374	7.3	21.598	NA	NA	20.333333333333332	NA	NA	NA	NA	40	S	8
Kin	18	111	9.12.1	16	33	NA	120	5.939	2.901	12.66	9.9	26.4	NA	NA	22.333333333333332	NA	NA	NA	NA	20	S	7
Kin	18	80	9.13.1	16	34	NA	80	6.496	3.012	14.583	12	30.227	NA	NA	23.5	NA	NA	NA	NA	0	R	7
Kin	18	142	9.14.1	16	35	NA	105	6.067	3.148	14.077	10.6	35.932	NA	NA	19.166666666666668	NA	NA	NA	NA	0	R	5
Kin	18	LA95135	9.15.1	16	36	NA	105	6.503	3.309	16.04	11.4	41.304	NA	NA	19.333333333333332	NA	NA	NA	NA	0	R	6
Kin	18	122	9.16.1	16	37	NA	110	6.093	2.974	13.576	9.8	31.511	NA	NA	19.666666666666668	NA	NA	NA	NA	0	R	4
Kin	18	110	9.17.1	16	38	NA	125	6.13	3.101	14.201	12.7	32.481	NA	NA	23.5	NA	NA	NA	NA	0	R	4
Kin	18	78	9.18.1	16	39	NA	105	6.248	3.093	14.452	12.1	34.77	NA	NA	21	NA	NA	NA	NA	0	R	4
Kin	18	109	9.19.1	16	40	NA	80	NA	NA	NA	NA	NA	NA	NA	21	NA	NA	NA	NA	0	R	7
Kin	18	108	9.20.1	16	41	NA	85	5.793	2.817	12.278	8.2	24.773	NA	NA	21.166666666666668	NA	NA	NA	NA	25	S	7
Kin	18	146	10.2.1	16	44	NA	95	6.319	2.882	13.562	8	29.63	NA	NA	21.666666666666668	NA	NA	NA	NA	0	R	6
Kin	18	190	10.3.1	16	45	NA	100	5.998	2.751	12.138	5.3	24.537	NA	NA	17.833333333333332	NA	NA	NA	NA	0	R	7
Kin	18	165	10.4.1	16	46	NA	100	5.831	2.948	12.809	8.4	27.184	NA	NA	22.166666666666668	NA	NA	NA	NA	25	S	6
Kin	18	152	10.5.1	16	47	NA	95	6.416	3.086	14.504	9.9	33.221	NA	NA	22	NA	NA	NA	NA	5	S	6
Kin	18	151	10.6.1	16	48	NA	100	6.234	3.098	14.324	10.9	31.871	NA	NA	21.833333333333332	NA	NA	NA	NA	0	R	6
Kin	18	189	10.7.1	16	49	NA	115	5.771	2.877	12.104	8	25.806	NA	NA	21.5	NA	NA	NA	NA	15	S	4
Kin	18	216	10.8.1	16	50	NA	95	6.1795	2.8415	12.937999999999999	10.3	25.9365	NA	NA	24.833333333333332	NA	NA	NA	NA	30	S	5
Kin	18	157	10.9.1	16	51	NA	125	6.322	3.161	14.739	11.4	34.03	NA	NA	21.5	NA	NA	NA	NA	0	R	4
Kin	18	185	10.10.1	16	52	NA	100	6.578	3.114	15.311	10.7	38.351	NA	NA	20.5	NA	NA	NA	NA	0	R	3
Kin	18	159	10.11.1	16	53	NA	105	6.403	3.011	14.336	8.6	30.714	NA	NA	23	NA	NA	NA	NA	15	S	6
Kin	18	214	10.12.1	16	54	NA	105	5.742	2.849	12.21	6.5	25.794	NA	NA	19.333333333333332	NA	NA	NA	NA	50	S	5
Kin	18	178	10.13.1	16	55	NA	95	6.468	2.883	13.483	5.9	28.641	NA	NA	17.333333333333332	NA	NA	NA	NA	0	R	6
Kin	18	149	10.14.1	16	56	NA	105	6.192	3.143	14.321	9.2	29.773	NA	NA	25.333333333333332	NA	NA	NA	NA	30	S	6
Kin	18	168	10.15.1	16	57	NA	100	5.984	3.087	13.418	9.1	33.456	NA	NA	19.833333333333332	NA	NA	NA	NA	0	R	6
Kin	18	171	10.16.1	16	58	NA	90	6.195	2.862	13.044	7.6	27.338	NA	NA	21.5	NA	NA	NA	NA	30	S	7
Kin	18	206	10.17.1	16	59	NA	90	6.207	2.901	13.254	6.7	27.917	NA	NA	21.166666666666668	NA	NA	NA	NA	0	R	8
Kin	18	200	10.18.1	16	60	NA	90	6.08	2.823	12.592	7.6	26.117	NA	NA	22.166666666666668	NA	NA	NA	NA	0	R	5
Kin	18	163	10.19.1	16	61	NA	110	6.152	2.982	13.669	10.7	30.141	NA	NA	22.333333333333332	NA	NA	NA	NA	0	R	4
Kin	18	204	10.20.1	16	62	NA	100	5.523	2.65	10.818	5.1	19.844	NA	NA	21.333333333333332	NA	NA	NA	NA	50	S	5
Kin	18	MPV57	8.1.2	17	1	NA	90	5.847	2.861	12.482	8.5	25.148	NA	NA	20.5	NA	NA	NA	NA	10	S	3
Kin	18	284	8.2.2	17	2	NA	95	5.809	2.917	12.564	7.7	27.113	NA	NA	19.833333333333332	NA	NA	NA	NA	10	S	6
Kin	18	229	8.3.2	17	3	NA	95	6.34	2.974	13.983	8.1	29.889	NA	NA	19.666666666666668	NA	NA	NA	NA	0	R	7
Kin	18	259	8.4.2	17	4	NA	95	6.181	2.981	13.842	9.3	29.43	NA	NA	20.666666666666668	NA	NA	NA	NA	0	R	3
Kin	18	253	8.5.2	17	5	NA	90	6.02	2.982	13.077	6.3	31.5	NA	NA	18.333333333333332	NA	NA	NA	NA	0	R	6
Kin	18	287	8.6.2	17	6	NA	80	5.863	2.745	11.747	4.7	22.381	NA	NA	19.166666666666668	NA	NA	NA	NA	0	R	8
Kin	18	265	8.7.2	17	7	NA	85	6.355	2.931	13.769	10.6	29.859	NA	NA	20.5	NA	NA	NA	NA	0	R	7
Kin	18	267	8.8.2	17	8	NA	90	6.568	2.914	14.4	8.6	27.389	NA	NA	21.333333333333332	NA	NA	NA	NA	20	S	5
Kin	18	273	8.9.2	17	9	NA	95	6.226	2.842	13.07	5.3	28.804	NA	NA	20	NA	NA	NA	NA	0	R	4
Kin	18	244	8.10.2	17	10	NA	85	6.188	3.046	14.043	7.4	31.76	NA	NA	20	NA	NA	NA	NA	0	R	6
Kin	18	272	8.11.2	17	11	NA	90	6.264	3.059	13.96	8.9	31.01	NA	NA	21	NA	NA	NA	NA	10	S	7
Kin	18	LA95135	8.12.2	17	12	NA	90	6.454	3.207	15.156	8.8	36.364	NA	NA	18.166666666666668	NA	NA	NA	NA	0	R	7
Kin	18	235	8.13.2	17	13	NA	90	6.086	2.887	12.768	0.6	30	NA	NA	20.166666666666668	NA	NA	NA	NA	0	R	5
Kin	18	277	8.14.2	17	14	NA	90	6.73	3.156	15.752	9	33.457	NA	NA	19.5	NA	NA	NA	NA	30	S	4
Kin	18	237	8.15.2	17	15	NA	85	5.964	3.001	13.048	6.2	30.693	NA	NA	17.833333333333332	NA	NA	NA	NA	0	R	7
Kin	18	248	8.16.2	17	16	NA	95	6.622	2.929	14.46	10.4	33.121	NA	NA	21.666666666666668	NA	NA	NA	NA	0	R	2
Kin	18	MPV57	8.17.2	17	17	NA	90	6.018	2.82	12.415	7.2	25.623	NA	NA	21.166666666666668	NA	NA	NA	NA	15	S	2
Kin	18	275	8.18.2	17	18	NA	95	6.147	2.952	13.245	9.5	29.503	NA	NA	20.833333333333332	NA	NA	NA	NA	30	S	4
Kin	18	241	8.19.2	17	19	NA	115	6.159	3.2	14.409	9.8	35.636	NA	NA	17.666666666666668	NA	NA	NA	NA	0	R	2
Kin	18	271	8.20.2	17	20	NA	95	6.487	3.047	14.758	10	29.94	NA	NA	20.833333333333332	NA	NA	NA	NA	0	R	4
Kin	18	MPV57	9.1.2	17	22	NA	100	6.1	2.902	13.02	8.5	28.053	NA	NA	21.833333333333332	NA	NA	NA	NA	10	S	3
Kin	18	101	9.2.2	17	23	NA	85	6.49	3.308	15.499	8.2	37.443	NA	NA	19.833333333333332	NA	NA	NA	NA	30	S	7
Kin	18	100	9.3.2	17	24	NA	95	6.253	3.12	14.315	8	34.934	NA	NA	17.333333333333332	NA	NA	NA	NA	0	R	5
Kin	18	116	9.4.2	17	25	NA	80	6.244	3.056	14.167	9.9	31.629	NA	NA	21.5	NA	NA	NA	NA	20	S	7
Kin	18	73	9.5.2	17	26	NA	90	6.211	2.984	13.86	10.8	28.052	NA	NA	22.666666666666668	NA	NA	NA	NA	0	R	7
Kin	18	126	9.6.2	17	27	NA	100	NA	NA	NA	NA	NA	NA	NA	19.333333333333332	NA	NA	NA	NA	0	R	5
Kin	18	85	9.7.2	17	28	NA	115	6.16	3.226	14.6	9.5	34.545	NA	NA	20.5	NA	NA	NA	NA	15	S	3
Kin	18	130	9.8.2	17	29	NA	85	6.008	2.772	12.182	6.8	25	NA	NA	21.166666666666668	NA	NA	NA	NA	15	S	4
Kin	18	91	9.9.2	17	30	NA	95	6.477	3.207	15.465	11.1	35.922	NA	NA	20.5	NA	NA	NA	NA	NA	mix	7
Kin	18	138	9.10.2	17	31	NA	85	5.858	3.029	13.263	8.8	30.45	NA	NA	20.166666666666668	NA	NA	NA	NA	0	R	7
Kin	18	93	9.11.2	17	32	NA	100	6.595	3.443	16.647	12.1	43.214	NA	NA	18.666666666666668	NA	NA	NA	NA	0	R	5
Kin	18	90	9.12.2	17	33	NA	95	5.872	3.193	13.988	8.7	31.408	NA	NA	22	NA	NA	NA	NA	40	S	4
Kin	18	128	9.13.2	17	34	NA	115	5.991	3.137	13.899	9.8	33.108	NA	NA	20	NA	NA	NA	NA	20	S	3
Kin	18	92	9.14.2	17	35	NA	90	6.131	3.12	14.2	10.6	32.615	NA	NA	23	NA	NA	NA	NA	0	R	5
Kin	18	137	9.15.2	17	36	NA	100	5.704	2.799	11.856	8.8	25.656	NA	NA	22.166666666666668	NA	NA	NA	NA	0	R	3
Kin	18	81	9.16.2	17	37	NA	90	6.115	3.118	13.913	8.9	30.903	NA	NA	21.333333333333332	NA	NA	NA	NA	25	S	5
Kin	18	135	9.17.2	17	38	NA	95	6.578	3.254	15.705	10.1	40.079	NA	NA	18.166666666666668	NA	NA	NA	NA	0	R	7
Kin	18	144	9.18.2	17	39	NA	110	6.025	2.953	13.28	7.9	29.924	NA	NA	19.833333333333332	NA	NA	NA	NA	30	S	4
Kin	18	143	9.19.2	17	40	NA	100	6.261	3.129	14.317	9.4	31.973	NA	NA	20.166666666666668	NA	NA	NA	NA	0	R	5
Kin	18	131	9.20.2	17	41	NA	120	6.248	3.202	14.724	9.4	34.182	NA	NA	21	NA	NA	NA	NA	40	S	3
Kin	18	LA95135	10.1.2	17	43	NA	95	6.359	3.165	14.9	8.7	35.51	NA	NA	17.666666666666668	NA	NA	NA	NA	0	R	4
Kin	18	186	10.2.2	17	44	NA	85	6.424	2.919	13.645	8.7	30.961	NA	NA	20.5	NA	NA	NA	NA	0	R	5
Kin	18	MPV57	10.3.2	17	45	NA	95	5.96	2.84	12.508	6.8	25.564	NA	NA	21	NA	NA	NA	NA	15	S	3
Kin	18	172	10.4.2	17	46	NA	110	6.409	3.073	14.588	9.5	33.217	NA	NA	20.5	NA	NA	NA	NA	10	S	3
Kin	18	179	10.5.2	17	47	NA	110	6.398	3.138	14.473	10.9	35.39	NA	NA	21.5	NA	NA	NA	NA	0	R	3
Kin	18	182	10.6.2	17	48	NA	110	6.611	3.197	15.212	7.7	35	NA	NA	20.333333333333332	NA	NA	NA	NA	0	R	2
Kin	18	192	10.7.2	17	49	NA	110	6.33	3.08	14.2	9.7	33.219	NA	NA	21	NA	NA	NA	NA	20	S	5
Kin	18	154	10.8.2	17	50	NA	110	6.0905000000000005	2.9895	13.197	8.25	30.810000000000002	NA	NA	20.083333333333332	NA	NA	NA	NA	25	S	3
Kin	18	213	10.9.2	17	51	NA	120	6.842	3.366	17.058	10.6	40.458	NA	NA	18.833333333333332	NA	NA	NA	NA	15	S	3
Kin	18	215	10.10.2	17	52	NA	105	5.574	3.02	12.22	6.4	28.959	NA	NA	19.5	NA	NA	NA	NA	40	S	2
Kin	18	211	10.11.2	17	53	NA	100	5.936	2.933	12.638	5.4	30.168	NA	NA	17.666666666666668	NA	NA	NA	NA	25	S	6
Kin	18	LA95135	10.12.2	17	54	NA	105	6.412	3.269	15.509	9.6	38.71	NA	NA	18.166666666666668	NA	NA	NA	NA	0	R	6
Kin	18	183	10.13.2	17	55	NA	85	6.267	2.86	13.035	5.7	26.887	NA	NA	21.833333333333332	NA	NA	NA	NA	0	R	7
Kin	18	196	10.14.2	17	56	NA	100	6.152	2.906	13.109	8.3	27.124	NA	NA	21.5	NA	NA	NA	NA	5	S	5
Kin	18	201	10.15.2	17	57	NA	85	6.079	3.265	14.537	7.9	36.073	NA	NA	19.666666666666668	NA	NA	NA	NA	0	R	7
Kin	18	212	10.16.2	17	58	NA	95	5.866	3.314	14.297	6.9	34.158	NA	NA	18.666666666666668	NA	NA	NA	NA	20	S	7
Kin	18	187	10.17.2	17	59	NA	105	6.007	3.083	13.747	10.2	33.663	NA	NA	23.5	NA	NA	NA	NA	0	R	6
Kin	18	202	10.18.2	17	60	NA	105	6.302	3.137	14.336	7	37.838	NA	NA	18.833333333333332	NA	NA	NA	NA	0	R	4
Kin	18	198	10.19.2	17	61	NA	105	6.331	2.886	13.233	7.6	28.679	NA	NA	20.833333333333332	NA	NA	NA	NA	35	S	4
Kin	18	197	10.20.2	17	62	NA	105	6.734	3.1	15.169	7.4	35.238	NA	NA	18	NA	NA	NA	NA	0	R	3
Kin	18	LA95135	8.1.3	18	1	NA	105	6.239	3.072	14.287	9.6	32.765	NA	NA	18.166666666666668	NA	NA	NA	NA	0	R	4
Kin	18	252	8.2.3	18	2	NA	85	5.96	2.8259999999999996	12.48	2.8	21.943	NA	NA	25.583333333333332	NA	NA	NA	NA	15	S	5
Kin	18	288	8.3.3	18	3	NA	105	5.937	2.939	12.882	8.9	27.987	NA	NA	21	NA	NA	NA	NA	0	R	3
Kin	18	MPV57	8.4.3	18	4	NA	95	5.829	2.813	12.258	7.7	25.926	NA	NA	21.666666666666668	NA	NA	NA	NA	5	S	2
Kin	18	286	8.5.3	18	5	NA	85	5.887	2.877	12.433	6.5	27.778	NA	NA	17.333333333333332	NA	NA	NA	NA	0	R	4
Kin	18	240	8.6.3	18	6	NA	85	6.128	2.769	12.684	7.5	25.685	NA	NA	NA	NA	NA	NA	NA	10	S	8
Kin	18	263	8.7.3	18	7	NA	95	5.902	3.095	13.563	8	30.888	NA	NA	20.5	NA	NA	NA	NA	5	S	6
Kin	18	230	8.8.3	18	8	NA	85	6.233	2.967	13.612	7.6	30.522	NA	NA	20.5	NA	NA	NA	NA	5	S	8
Kin	18	279	8.9.3	18	9	NA	90	6.127	3.102	14.108	8.9	32.246	NA	NA	20.833333333333332	NA	NA	NA	NA	15	S	6
Kin	18	MPV57	8.10.3	18	10	NA	90	5.904	2.87	12.68	8.4	26.837	NA	NA	21.333333333333332	NA	NA	NA	NA	20	S	4
Kin	18	264	8.11.3	18	11	NA	85	6.22	2.974	13.632	7.1	28.98	NA	NA	18.833333333333332	NA	NA	NA	NA	20	S	8
Kin	18	239	8.12.3	18	12	NA	105	5.991	3.156	13.775	8.5	30.576	NA	NA	20	NA	NA	NA	NA	40	S	4
Kin	18	243	8.13.3	18	13	NA	80	6.086	2.946	13.271	8	28.169	NA	NA	20.666666666666668	NA	NA	NA	NA	20	S	6
Kin	18	256	8.14.3	18	14	NA	100	5.733	3.016	12.8	8.7	29	NA	NA	20.666666666666668	NA	NA	NA	NA	30	S	7
Kin	18	255	8.15.3	18	15	NA	85	6.135	3.108	13.912	10.4	31.804	NA	NA	20.333333333333332	NA	NA	NA	NA	0	R	6
Kin	18	232	8.16.3	18	16	NA	95	6.138	3.164	14.265	10	35.714	NA	NA	18.833333333333332	NA	NA	NA	NA	15	S	4
Kin	18	266	8.17.3	18	17	NA	90	6.769	3.089	15.507	10.3	31.988	NA	NA	20.166666666666668	NA	NA	NA	NA	0	R	3
Kin	18	233	8.18.3	18	18	NA	85	6.044	3.069	13.351	8.1	30.566	NA	NA	20.333333333333332	NA	NA	NA	NA	10	S	4
Kin	18	247	8.19.3	18	19	NA	105	5.839	3.068	13.094	9.2	31.507	NA	NA	19.666666666666668	NA	NA	NA	NA	30	S	4
Kin	18	269	8.20.3	18	20	NA	125	6.146	3.0355	13.6415	10.35	29.8425	NA	NA	21.833333333333332	NA	NA	NA	NA	30	S	2
Kin	18	LA95135	9.1.3	18	22	NA	100	6.369	3.154	14.763	8.4	34.426	NA	NA	16.833333333333332	NA	NA	NA	NA	0	R	5
Kin	18	114	9.2.3	18	23	NA	80	5.797	3.058	13.007	9.6	30.671	NA	NA	20.166666666666668	NA	NA	NA	NA	0	R	NA
Kin	18	LA95135	9.3.3	18	24	NA	95	NA	NA	NA	NA	NA	NA	NA	18.166666666666668	NA	NA	NA	NA	0	R	6
Kin	18	118	9.4.3	18	25	NA	115	6.388	3.168	14.621	10	34.13	NA	NA	21	NA	NA	NA	NA	25	S	6
Kin	18	119	9.5.3	18	26	NA	95	6.188	3.108	13.824	6.5	31.863	NA	NA	17.833333333333332	NA	NA	NA	NA	10	S	5
Kin	18	102	9.6.3	18	27	NA	115	6.17	3.003	13.619	7.5	29.762	NA	NA	19.5	NA	NA	NA	NA	0	R	3
Kin	18	115	9.7.3	18	28	NA	105	6.491	3.319	15.75	9.5	38.462	NA	NA	19.5	NA	NA	NA	NA	20	S	NA
Kin	18	129	9.8.3	18	29	NA	75	6.616	2.974	14.542	9.3	31.313	NA	NA	19.166666666666668	NA	NA	NA	NA	NA	NA	4
Kin	18	132	9.9.3	18	30	NA	110	5.995	3.286	14.519	11.4	37.377	NA	NA	21.166666666666668	NA	NA	NA	NA	0	R	6
Kin	18	94	9.10.3	18	31	NA	110	6.411	3.097	14.307	1.6	38.095	NA	NA	20.833333333333332	NA	NA	NA	NA	10	S	4
Kin	18	74	9.11.3	18	32	NA	95	6.332	3.088	14.622	9.1	33.456	NA	NA	20.166666666666668	NA	NA	NA	NA	0	R	6
Kin	18	134	9.12.3	18	33	NA	90	5.9	2.8	12.072	5.5	25.114	NA	NA	16.166666666666668	NA	NA	NA	NA	20	S	5
Kin	18	MPV57	9.13.3	18	34	NA	90	6.081	2.919	13.027	9.1	27.914	NA	NA	21.833333333333332	NA	NA	NA	NA	15	S	2
Kin	18	106	9.14.3	18	35	NA	105	5.965	2.888	12.693	6.3	26.923	NA	NA	16.333333333333332	NA	NA	NA	NA	0	R	3
Kin	18	105	9.15.3	18	36	NA	90	6.477	3.121	14.87	10.1	33.333	NA	NA	21.166666666666668	NA	NA	NA	NA	5	S	4
Kin	18	139	9.16.3	18	37	NA	85	5.826	2.938	12.729	7.2	27.799	NA	NA	19	NA	NA	NA	NA	20	S	6
Kin	18	99	9.17.3	18	38	NA	100	6.208	3.059	13.963	9.1	32.155	NA	NA	19.5	NA	NA	NA	NA	0	R	5
Kin	18	98	9.18.3	18	39	NA	75	5.477	2.756	11.057	5.1	20.565	NA	NA	18.5	NA	NA	NA	NA	0	R	6
Kin	18	136	9.19.3	18	40	NA	110	6.526	3.28	15.771	12.1	38.05	NA	NA	22.166666666666668	NA	NA	NA	NA	NA	mix	5
Kin	18	76	9.20.3	18	41	NA	100	5.826	2.864	12.319	7.6	27.24	NA	NA	19.666666666666668	NA	NA	NA	NA	0	R	2
Kin	18	LA95135	10.1.3	18	43	NA	100	6.506	3.215	15.406	10.1	36.201	NA	NA	18.5	NA	NA	NA	NA	0	R	4
Kin	18	167	10.2.3	18	44	NA	90	6.5125	3.0685000000000002	14.8525	7.25	33.866	NA	NA	19.583333333333332	NA	NA	NA	NA	0	R	6
Kin	18	193	10.3.3	18	45	NA	95	6.367	3.079	14.416	8.9	30.068	NA	NA	21.333333333333332	NA	NA	NA	NA	25	S	4
Kin	18	184	10.4.3	18	46	NA	95	6.152	3.103	13.965	9.1	29.739	NA	NA	22.333333333333332	NA	NA	NA	NA	30	S	4
Kin	18	170	10.5.3	18	47	NA	95	6.261	3.014	13.693	7.2	30.252	NA	NA	16.833333333333332	NA	NA	NA	NA	15	S	7
Kin	18	LA95135	10.6.3	18	48	NA	100	6.615	3.236	15.774	9.4	37.45	NA	NA	17.166666666666668	NA	NA	NA	NA	0	R	3
Kin	18	180	10.7.3	18	49	NA	100	5.737	3.029	12.816	7.1	30.87	NA	NA	16.5	NA	NA	NA	NA	0	R	2
Kin	18	203	10.8.3	18	50	NA	110	5.999	3.14	14.044	9.4	34.432	NA	NA	21.833333333333332	NA	NA	NA	NA	35	S	3
Kin	18	164	10.9.3	18	51	NA	90	6.358	3.199	15.111	10.5	35.959	NA	NA	19.333333333333332	NA	NA	NA	NA	0	R	2
Kin	18	150	10.10.3	18	52	NA	85	6.391	3.003	14.034	9.3	31.633	NA	NA	22.333333333333332	NA	NA	NA	NA	5	S	3
Kin	18	158	10.11.3	18	53	NA	95	6.568	3.109	15.013	9.6	34.286	NA	NA	23.166666666666668	NA	NA	NA	NA	10	S	5
Kin	18	208	10.12.3	18	54	NA	115	6.017	2.927	13.13	6.3	28.507	NA	NA	21.333333333333332	NA	NA	NA	NA	50	S	3
Kin	18	177	10.13.3	18	55	NA	95	5.971	2.879	12.78	8.2	27.243	NA	NA	23.5	NA	NA	NA	NA	5	S	4
Kin	18	162	10.14.3	18	56	NA	85	6.466	3.277	15.344	8.1	34.914	NA	NA	21.5	NA	NA	NA	NA	0	R	6
Kin	18	195	10.15.3	18	57	NA	100	6.137	3.169	14.424	9.7	35.145	NA	NA	20.5	NA	NA	NA	NA	0	R	7
Kin	18	160	10.16.3	18	58	NA	95	5.957	3.071	13.413	8.2	31.538	NA	NA	20.166666666666668	NA	NA	NA	NA	15	S	6
Kin	18	188	10.17.3	18	59	NA	90	6.159	2.997	13.686	8.7	30.851	NA	NA	20.666666666666668	NA	NA	NA	NA	20	S	6
Kin	18	191	10.18.3	18	60	NA	95	6.121	2.89	13.025	6.9	25.368	NA	NA	21	NA	NA	NA	NA	25	S	5
Kin	18	166	10.19.3	18	61	NA	105	6.472	3.21	15.015	8.8	34.783	NA	NA	20.333333333333332	NA	NA	NA	NA	0	R	5
Kin	18	173	10.20.3	18	62	NA	105	5.743	2.93	12.327	7.6	25.85	NA	NA	21.333333333333332	NA	NA	NA	NA	0	R	4
Kin	18	MPV57	8.1.4	19	1	NA	90	5.752	2.742	11.872	7.2	24.161	NA	NA	19.333333333333332	NA	NA	NA	NA	10	S	3
Kin	18	249	8.2.4	19	2	NA	90	6.122	2.813	12.833	7.9	25.987	NA	NA	19.666666666666668	NA	NA	NA	NA	0	R	8
Kin	18	231	8.3.4	19	3	NA	95	5.824	2.86	12.507	9.6	25.737	NA	NA	22.166666666666668	NA	NA	NA	NA	30	S	8
Kin	18	283	8.4.4	19	4	NA	100	6.182	2.851	13.152	9.7	27.635	NA	NA	21.166666666666668	NA	NA	NA	NA	0	R	5
Kin	18	222	8.5.4	19	5	NA	120	6.065	3.037	13.817	11.1	29.211	NA	NA	20.333333333333332	NA	NA	NA	NA	0	R	4
Kin	18	281	8.6.4	19	6	NA	85	5.642	2.49	10.341	4.9	19.522	NA	NA	17.833333333333332	NA	NA	NA	NA	0	R	7
Kin	18	218	8.7.4	19	7	NA	100	6.039	3.203	14.475	9.3	33.818	NA	NA	21	NA	NA	NA	NA	30	S	6
Kin	18	250	8.8.4	19	8	NA	105	5.72	2.829	11.939	7.3	25.524	NA	NA	20.166666666666668	NA	NA	NA	NA	30	S	6
Kin	18	238	8.9.4	19	9	NA	85	6.13	2.814	13.102	7.2	28.125	NA	NA	20.666666666666668	NA	NA	NA	NA	0	R	5
Kin	18	254	8.10.4	19	10	NA	95	6.0375	2.9619999999999997	13.1435	3.6	25.777	NA	NA	21	NA	NA	NA	NA	0	R	4
Kin	18	217	8.11.4	19	11	NA	105	6.764	3.29	16.281	10.2	41.296	NA	NA	18.5	NA	NA	NA	NA	0	R	6
Kin	18	251	8.12.4	19	12	NA	95	6.134	2.979	13.514	7	30.435	NA	NA	19.166666666666668	NA	NA	NA	NA	20	S	4
Kin	18	258	8.13.4	19	13	NA	90	6.661	3.127	15.708	9.3	32.862	NA	NA	20.166666666666668	NA	NA	NA	NA	0	R	7
Kin	18	226	8.14.4	19	14	NA	85	6.678	3.101	15.386	10.2	33.01	NA	NA	22	NA	NA	NA	NA	0	R	5
Kin	18	219	8.15.4	19	15	NA	100	6.072	3.097	13.864	9.4	31.864	NA	NA	20.333333333333332	NA	NA	NA	NA	25	S	5
Kin	18	262	8.16.4	19	16	NA	105	6.375	2.967	13.897	8.6	30.07	NA	NA	20.666666666666668	NA	NA	NA	NA	0	R	3
Kin	18	236	8.17.4	19	17	NA	110	6.32	3.246	14.992	9.5	33.217	NA	NA	21.333333333333332	NA	NA	NA	NA	30	S	5
Kin	18	242	8.18.4	19	18	NA	95	6.212	2.858	13.067	5.6	23.529	NA	NA	19.5	NA	NA	NA	NA	10	S	8
Kin	18	220	8.19.4	19	19	NA	110	6.873	3.06	15.655	9.2	32.168	NA	NA	20	NA	NA	NA	NA	0	R	3
Kin	18	234	8.20.4	19	20	NA	105	6.355	2.907	13.646	8.7	28.713	NA	NA	20.666666666666668	NA	NA	NA	NA	0	R	1
Kin	18	MPV57	9.1.4	19	22	NA	100	6.136	2.928	13.169	8.1	26.821	NA	NA	21.166666666666668	NA	NA	NA	NA	10	S	2
Kin	18	104	9.2.4	19	23	NA	100	6.374	3.007	14.063	9.6	31.068	NA	NA	22.333333333333332	NA	NA	NA	NA	0	R	6
Kin	18	123	9.3.4	19	24	NA	80	5.608	2.826	11.716	9	23.56	NA	NA	21.833333333333332	NA	NA	NA	NA	15	S	4
Kin	18	86	9.4.4	19	25	NA	110	6.295	3.106	14.341	8.6	33.725	NA	NA	18.5	NA	NA	NA	NA	10	S	3
Kin	18	95	9.5.4	19	26	NA	90	6.171	2.946	13.444	8.9	28.896	NA	NA	21.333333333333332	NA	NA	NA	NA	20	S	5
Kin	18	84	9.6.4	19	27	NA	90	6.182	3.167	14.282	8.4	34.146	NA	NA	19	NA	NA	NA	NA	0	R	1
Kin	18	89	9.7.4	19	28	NA	95	5.893	2.852	12.621	8.4	25.301	NA	NA	21.166666666666668	NA	NA	NA	NA	10	S	4
Kin	18	88	9.8.4	19	29	NA	95	6.418	3.343	16.005	10.7	40.377	NA	NA	18.666666666666668	NA	NA	NA	NA	0	R	5
Kin	18	112	9.9.4	19	30	NA	115	5.977	2.987	13.017	9	30.1	NA	NA	21	NA	NA	NA	NA	15	S	5
Kin	18	133	9.10.4	19	31	NA	105	6.2605	3.0455	14.0595	3.25	32.8355	NA	NA	23.333333333333332	NA	NA	NA	NA	5	S	4
Kin	18	103	9.11.4	19	32	NA	90	6.231	2.974	13.634	7.9	30.153	NA	NA	20.833333333333332	NA	NA	NA	NA	0	R	6
Kin	18	83	9.12.4	19	33	NA	90	6.322	2.858	13.154	8.2	26.974	NA	NA	21	NA	NA	NA	NA	0	R	3
Kin	18	121	9.13.4	19	34	NA	80	5.995	2.935	13.35	8.2	28.374	NA	NA	20.166666666666668	NA	NA	NA	NA	0	R	5
Kin	18	79	9.14.4	19	35	NA	100	5.989	2.964	13.166	9.1	29.167	NA	NA	21.166666666666668	NA	NA	NA	NA	35	S	NA
Kin	18	96	9.15.4	19	36	NA	115	5.941	3.131	13.729	9.4	32.526	NA	NA	22.5	NA	NA	NA	NA	10	S	2
Kin	18	75	9.16.4	19	37	NA	85	6.49	3.188	15.547	10	33.223	NA	NA	20.666666666666668	NA	NA	NA	NA	0	R	6
Kin	18	117	9.17.4	19	38	NA	85	6.294	2.998	14.09	8.7	31.636	NA	NA	19.833333333333332	NA	NA	NA	NA	0	R	5
Kin	18	140	9.18.4	19	39	NA	90	6.283	2.858	13.409	7.9	27.241	NA	NA	22.5	NA	NA	NA	NA	0	R	6
Kin	18	124	9.19.4	19	40	NA	90	5.949	2.712	11.973	6	24.49	NA	NA	20.5	NA	NA	NA	NA	0	R	5
Kin	18	141	9.20.4	19	41	NA	115	6.572	3.2	15.541	9.9	36.803	NA	NA	19.833333333333332	NA	NA	NA	NA	0	R	5
Kin	18	MPV57	10.1.4	19	43	NA	95	5.997	2.905	12.72	6.7	27.016	NA	NA	19.5	NA	NA	NA	NA	20	S	3
Kin	18	153	10.2.4	19	44	NA	110	6.222	3.05	13.766	7.8	31.579	NA	NA	19.833333333333332	NA	NA	NA	NA	25	S	5
Kin	18	175	10.3.4	19	45	NA	90	6.527	3.034	14.466	6.4	30.047	NA	NA	18	NA	NA	NA	NA	0	R	4
Kin	18	145	10.4.4	19	46	NA	95	6.264	3.213	15.107	11.5	35.826	NA	NA	20	NA	NA	NA	NA	10	S	5
Kin	18	205	10.5.4	19	47	NA	95	5.822	2.937	12.62	7.6	27.338	NA	NA	20.666666666666668	NA	NA	NA	NA	0	R	7
Kin	18	176	10.6.4	19	48	NA	95	5.96	2.893	12.769	9.2	25.915	NA	NA	23.166666666666668	NA	NA	NA	NA	10	S	3
Kin	18	207	10.7.4	19	49	NA	85	6.222	2.916	13.09	7.1	28.175	NA	NA	19.666666666666668	NA	NA	NA	NA	25	S	3
Kin	18	147	10.8.4	19	50	NA	105	5.93	2.996	12.944	8.4	30.325	NA	NA	19.5	NA	NA	NA	NA	15	S	4
Kin	18	194	10.9.4	19	51	NA	90	6.312	2.937	13.751	6.4	30.332	NA	NA	18.833333333333332	NA	NA	NA	NA	0	R	3
Kin	18	199	10.10.4	19	52	NA	115	6.335	2.995	14.061	9.6	28.07	NA	NA	23.166666666666668	NA	NA	NA	NA	50	S	5
Kin	18	174	10.11.4	19	53	NA	75	6.255	3.093	14.163	9.8	34.266	NA	NA	20.5	NA	NA	NA	NA	0	R	6
Kin	18	210	10.12.4	19	54	NA	115	6.263	2.985	13.845	7.2	29.752	NA	NA	19.166666666666668	NA	NA	NA	NA	NA	mix	2
Kin	18	156	10.13.4	19	55	NA	110	6.282	3.142	14.11	8.5	34.553	NA	NA	17.833333333333332	NA	NA	NA	NA	0	R	4
Kin	18	209	10.14.4	19	56	NA	85	7.025	3.291	17.009	10.8	40.149	NA	NA	21	NA	NA	NA	NA	0	R	5
Kin	18	MPV57	10.15.4	19	57	NA	95	6.048	2.97	13.309	7.7	29.73	NA	NA	21.5	NA	NA	NA	NA	15	S	3
Kin	18	181	10.16.4	19	58	NA	100	6.126	3.071	13.836	8.4	32.685	NA	NA	20.833333333333332	NA	NA	NA	NA	20	S	5
Kin	18	161	10.17.4	19	59	NA	95	6.062	2.792	12.385	7.4	25	NA	NA	21.833333333333332	NA	NA	NA	NA	0	R	3
Kin	18	148	10.18.4	19	60	NA	95	6.308	2.821	12.977	7.5	24.671	NA	NA	19.833333333333332	NA	NA	NA	NA	30	S	7
Kin	18	169	10.19.4	19	61	NA	95	6.438	3.037	14.762	10.5	31.343	NA	NA	21.666666666666668	NA	NA	NA	NA	0	R	3
Kin	18	155	10.20.4	19	62	NA	85	5.463	2.641	10.565	3.8	17.674	NA	NA	18.666666666666668	NA	NA	NA	NA	0	R	8
Ral	18	299	1.2.1	1	2	113	80	6.3	3	14.2	7.17	26.46	NA	NA	22.833333333333332	NA	NA	NA	NA	NA	NA	NA
Ral	18	324	1.3.1	1	3	113	115	6.6	3.3	16.2	8.56	34.52	NA	NA	22.5	NA	NA	NA	NA	NA	NA	NA
Ral	18	306	1.4.1	1	4	109	82.5	6.8	3.1	15.7	8.1	32.93	NA	NA	17.833333333333332	NA	NA	NA	NA	NA	NA	NA
Ral	18	310	1.5.1	1	5	116	115	6.8	3.3	16.7	8.67	36.74	NA	NA	22.666666666666668	NA	NA	NA	NA	NA	NA	NA
Ral	18	312	1.6.1	1	6	110	80	6.5	3	14.4	7.86	27.77	NA	NA	20.666666666666668	NA	NA	NA	NA	NA	NA	NA
Ral	18	289	1.7.1	1	7	107	82.5	6.6	3.1	15.2	8.04	29.45	NA	NA	21.333333333333332	NA	NA	NA	NA	NA	NA	NA
Ral	18	311	1.8.1	1	8	117	90	6.1	2.7	12.7	5.88	21.23	NA	NA	22.833333333333332	NA	NA	NA	NA	NA	NA	NA
Ral	18	339	1.9.1	1	9	113	102.5	6.4	3.1	14.9	7.77	30	NA	NA	21.166666666666668	NA	NA	NA	NA	NA	NA	NA
Ral	18	304	1.10.1	1	10	120	85	6.1	2.9	13.5	7.15	23.99	NA	NA	24.2	NA	NA	NA	NA	NA	NA	NA
Ral	18	341	1.11.1	1	11	115	105	6.4	3.1	14.9	8.22	31.37	NA	NA	21.5	NA	NA	NA	NA	NA	NA	NA
Ral	18	298	1.12.1	1	12	119	120	6.5	3.2	15.8	8.99	34.71	NA	NA	23.166666666666668	NA	NA	NA	NA	NA	NA	NA
Ral	18	314	1.13.1	1	13	114	107.5	6.4	3.1	15.1	7.88	32.97	NA	NA	21	NA	NA	NA	NA	NA	NA	NA
Ral	18	348	1.14.1	1	14	106	85	6.7	3.2	16	8.42	33.15	NA	NA	20.666666666666668	NA	NA	NA	NA	NA	NA	NA
Ral	18	322	1.15.1	1	15	111	97.5	6.4	3.3	15.6	8.47	36.04	NA	NA	19.5	NA	NA	NA	NA	NA	NA	NA
Ral	18	353	1.16.1	1	16	105	110	6.3	3.2	14.9	8.57	34.28	NA	NA	18.8	NA	NA	NA	NA	NA	NA	NA
Ral	18	344	1.17.1	1	17	113	105	6.7	3.1	15.5	9.01	34	NA	NA	20.833333333333332	NA	NA	NA	NA	NA	NA	NA
Ral	18	302	1.18.1	1	18	115	90	6.4	3.2	15.1	8.25	30.44	NA	NA	23.5	NA	NA	NA	NA	NA	NA	NA
Ral	18	334	1.19.1	1	19	109	82.5	6.4	3	14.4	8.78	29.86	NA	NA	19.4	NA	NA	NA	NA	NA	NA	NA
Ral	18	319	1.20.1	1	20	106	80	6.4	3.2	15.4	7.78	32.83	NA	NA	19.833333333333332	NA	NA	NA	NA	NA	NA	NA
Ral	18	224	2.2.1	1	23	113	87.5	5.7	3	12.5	8.16	23.12	NA	NA	22.166666666666668	NA	NA	NA	NA	NA	NA	NA
Ral	18	226	2.3.1	1	24	110	72.5	6.4	3	14.5	6.81	27.57	NA	NA	22.666666666666668	NA	NA	NA	NA	NA	NA	NA
Ral	18	264	2.4.1	1	25	109	85	6.3	3.1	14.4	8.17	29.28	NA	NA	17.166666666666668	NA	NA	NA	NA	NA	NA	NA
Ral	18	242	2.5.1	1	26	108	75	6.4	2.9	13.8	6.85	23.46	NA	NA	23.333333333333332	NA	NA	NA	NA	NA	NA	NA
Ral	18	253	2.6.1	1	27	107	100	6.5	3.2	15.2	8.53	33.19	NA	NA	21.166666666666668	NA	NA	NA	NA	NA	NA	NA
Ral	18	272	2.7.1	1	28	117	80	6.1	2.8	12.5	6.2	20.88	NA	NA	20.833333333333332	NA	NA	NA	NA	NA	NA	NA
Ral	18	218	2.8.1	1	29	112	95	6.4	3.3	15.6	8.74	32.98	NA	NA	21.5	NA	NA	NA	NA	NA	NA	NA
Ral	18	285	2.9.1	1	30	114	90	6.1	3	13.8	8.06	27.7	NA	NA	21.833333333333332	NA	NA	NA	NA	NA	NA	NA
Ral	18	250	2.10.1	1	31	116	100	6.2	3.2	15.1	8.59	31.81	NA	NA	21.333333333333332	NA	NA	NA	NA	NA	NA	NA
Ral	18	241	2.11.1	1	32	118	102.5	6.4	3.3	15.9	9.09	39.01	NA	NA	17.666666666666668	NA	NA	NA	NA	NA	NA	NA
Ral	18	280	2.12.1	1	33	114	65	6.4	2.9	13.6	7.18	25.19	NA	NA	18	NA	NA	NA	NA	NA	NA	NA
Ral	18	243	2.13.1	1	34	112	72.5	6.2	2.9	13.6	8.12	27.53	NA	NA	18	NA	NA	NA	NA	NA	NA	NA
Ral	18	248	2.14.1	1	35	118	87.5	6.5	2.9	14.2	7.33	28.08	NA	NA	21.166666666666668	NA	NA	NA	NA	NA	NA	NA
Ral	18	251	2.15.1	1	36	118	87.5	6	2.9	13.3	7.48	26.25	NA	NA	20.666666666666668	NA	NA	NA	NA	NA	NA	NA
Ral	18	288	2.16.1	1	37	121	90	6.3	3.2	15.1	7.57	31.15	NA	NA	22.666666666666668	NA	NA	NA	NA	NA	NA	NA
Ral	18	227	2.17.1	1	38	117	95	6.6	3.1	15.4	7.68	28.55	NA	NA	18.666666666666668	NA	NA	NA	NA	NA	NA	NA
Ral	18	287	2.18.1	1	39	109	90	6.4	3.3	15.8	8.8	33.72	NA	NA	19	NA	NA	NA	NA	NA	NA	NA
Ral	18	259	2.19.1	1	40	116	92.5	6.4	3	14.2	7.89	28.8	NA	NA	20.333333333333332	NA	NA	NA	NA	NA	NA	NA
Ral	18	228	2.20.1	1	41	110	100	6.3	3.3	15.8	9.05	34.41	NA	NA	20	NA	NA	NA	NA	NA	NA	NA
Ral	18	6	3.2.1	1	44	112	100	6.4	3	14.6	7.41	28.83	NA	NA	20.5	NA	NA	NA	NA	NA	NA	NA
Ral	18	8	3.3.1	1	45	114	102.5	6.4	2.9	13.6	6.85	24.91	NA	NA	22.333333333333332	NA	NA	NA	NA	NA	NA	NA
Ral	18	24	3.4.1	1	46	115	100	6.5	3.1	15	8.08	33.95	NA	NA	20.833333333333332	NA	NA	NA	NA	NA	NA	NA
Ral	18	40	3.5.1	1	47	112	87.5	6	2.9	13.1	8	24.24	NA	NA	21	NA	NA	NA	NA	NA	NA	NA
Ral	18	MPV57	3.6.1	1	48	114	90	6	3	13.6	8.69	27.33	NA	NA	23.166666666666668	NA	NA	NA	NA	NA	NA	NA
Ral	18	45	3.7.1	1	49	117	87.5	6.1	2.7	12.5	7.46	21.69	NA	NA	22.833333333333332	NA	NA	NA	NA	NA	NA	NA
Ral	18	13	3.8.1	1	50	114	90	6.6	3.1	15.4	8.8	33.08	NA	NA	21.333333333333332	NA	NA	NA	NA	NA	NA	NA
Ral	18	68	3.9.1	1	51	109	85	6.5	3.1	15.1	8.27	30.18	NA	NA	21	NA	NA	NA	NA	NA	NA	NA
Ral	18	22	3.10.1	1	52	109	95	6.4	3.1	14.6	8.23	30.15	NA	NA	19	NA	NA	NA	NA	NA	NA	NA
Ral	18	71	3.11.1	1	53	110	90	5.8	3	13.2	7.34	24.47	NA	NA	22.666666666666668	NA	NA	NA	NA	NA	NA	NA
Ral	18	57	3.12.1	1	54	107	87.5	6.5	3	14	8.72	28.4	NA	NA	19.166666666666668	NA	NA	NA	NA	NA	NA	NA
Ral	18	15	3.13.1	1	55	115	70	NA	NA	NA	NA	NA	NA	NA	21.083333333333332	NA	NA	NA	NA	NA	NA	NA
Ral	18	61	3.14.1	1	56	115	95	5.8	3	12.9	7.21	23.41	NA	NA	22	NA	NA	NA	NA	NA	NA	NA
Ral	18	54	3.15.1	1	57	114	90	7	3	15.5	7.77	31.46	NA	NA	20.833333333333332	NA	NA	NA	NA	NA	NA	NA
Ral	18	56	3.16.1	1	58	110	90	6.5	3.1	15.2	8.55	34.06	NA	NA	18.833333333333332	NA	NA	NA	NA	NA	NA	NA
Ral	18	55	3.17.1	1	59	106	95	6.2	3.1	14.1	9.22	29.65	NA	NA	20.166666666666668	NA	NA	NA	NA	NA	NA	NA
Ral	18	72	3.18.1	1	60	114	95	7	3	15.9	8.11	32.06	NA	NA	22.666666666666668	NA	NA	NA	NA	NA	NA	NA
Ral	18	58	3.20.1	1	62	108	100	7.1	3.3	17.7	8.84	39.29	NA	NA	22.333333333333332	NA	NA	NA	NA	NA	NA	NA
Ral	18	112	4.2.1	1	65	117	105	6.2	3	13.8	8.98	27.55	NA	NA	23.5	NA	NA	NA	NA	NA	NA	NA
Ral	18	86	4.3.1	1	66	115	112.5	6.5	3.2	15.7	9.86	35.85	NA	NA	20.833333333333332	NA	NA	NA	NA	NA	NA	NA
Ral	18	102	4.4.1	1	67	114	110	6.2	3.1	14.4	8.57	28.1	NA	NA	22.5	NA	NA	NA	NA	NA	NA	NA
Ral	18	117	4.5.1	1	68	113	70	6.4	2.9	13.7	8.45	26.66	NA	NA	19.833333333333332	NA	NA	NA	NA	NA	NA	NA
Ral	18	MPV57	4.6.1	1	69	112	82.5	6.1	3.1	13.9	9.29	28.41	NA	NA	22.5	NA	NA	NA	NA	NA	NA	NA
Ral	18	100	4.7.1	1	70	110	85	6.4	3.1	14.9	8.25	31.98	NA	NA	20.833333333333332	NA	NA	NA	NA	NA	NA	NA
Ral	18	122	4.8.1	1	71	116	100	6.3	3.2	15.1	9.16	33.8	NA	NA	21.5	NA	NA	NA	NA	NA	NA	NA
Ral	18	89	4.9.1	1	72	118	87.5	6	2.9	13.2	7.68	24.08	NA	NA	22.5	NA	NA	NA	NA	NA	NA	NA
Ral	18	101	4.10.1	1	73	110	80	6.5	3.1	15.1	8.99	33.17	NA	NA	19.5	NA	NA	NA	NA	NA	NA	NA
Ral	18	95	4.12.1	1	75	115	82.5	6.4	3.2	15.6	7.72	33.57	NA	NA	23.833333333333332	NA	NA	NA	NA	NA	NA	NA
Ral	18	138	4.13.1	1	76	113	75	6.1	2.9	13.5	6.55	25.89	NA	NA	20.5	NA	NA	NA	NA	NA	NA	NA
Ral	18	139	4.14.1	1	77	110	82.5	6.3	3	14.3	9.04	30.13	NA	NA	20.5	NA	NA	NA	NA	NA	NA	NA
Ral	18	114	4.15.1	1	78	109	75	6.1	2.9	13.4	8.79	27.13	NA	NA	20.333333333333332	NA	NA	NA	NA	NA	NA	NA
Ral	18	137	4.16.1	1	79	115	110	6.2	3.1	14.2	8.15	30.3	NA	NA	22.166666666666668	NA	NA	NA	NA	NA	NA	NA
Ral	18	142	4.17.1	1	80	113	90	6.3	3.2	15.3	8.47	31.96	NA	NA	19.5	NA	NA	NA	NA	NA	NA	NA
Ral	18	107	4.18.1	1	81	117	100	6.5	3	14.3	9.36	29.43	NA	NA	22	NA	NA	NA	NA	NA	NA	NA
Ral	18	144	4.19.1	1	82	113	105	6.5	3.2	15.6	9.4	35.74	NA	NA	21.666666666666668	NA	NA	NA	NA	NA	NA	NA
Ral	18	127	4.20.1	1	83	115	80	6.1	3.2	14.9	7.03	27.25	NA	NA	22.666666666666668	NA	NA	NA	NA	NA	NA	NA
Ral	18	164	5.2.1	1	86	115	95	6.1	3.1	14.6	7.67	30.2	NA	NA	20	NA	NA	NA	NA	NA	NA	NA
Ral	18	165	5.3.1	1	87	115	82.5	5.9	3	13.2	7.34	24.22	NA	NA	23	NA	NA	NA	NA	NA	NA	NA
Ral	18	152	5.4.1	1	88	109	75	6.9	3.1	15.5	8.66	31.84	NA	NA	20.333333333333332	NA	NA	NA	NA	NA	NA	NA
Ral	18	171	5.5.1	1	89	110	80	6.4	3	14.2	6.61	24.76	NA	NA	19.5	NA	NA	NA	NA	NA	NA	NA
Ral	18	175	5.6.1	1	90	110	92.5	6.6	3.1	15.6	7.95	30.11	NA	NA	20.5	NA	NA	NA	NA	NA	NA	NA
Ral	18	190	5.7.1	1	91	108	95	6.2	3.1	14.3	9.73	31.09	NA	NA	21.666666666666668	NA	NA	NA	NA	NA	NA	NA
Ral	18	194	5.8.1	1	92	107	87.5	6.7	3.1	15.7	8.54	32.97	NA	NA	21.666666666666668	NA	NA	NA	NA	NA	NA	NA
Ral	18	179	5.9.1	1	93	117	100	6.5	3.2	15.1	9.45	33.39	NA	NA	21	NA	NA	NA	NA	NA	NA	NA
Ral	18	212	5.10.1	1	94	109	87.5	6.1	3.1	14.4	8.81	31.81	NA	NA	18.666666666666668	NA	NA	NA	NA	NA	NA	NA
Ral	18	187	5.11.1	1	95	110	100	6.3	3.1	14.4	9.12	30.2	NA	NA	22	NA	NA	NA	NA	NA	NA	NA
Ral	18	213	5.12.1	1	96	118	105	7.1	3.5	18.2	8.67	42.5	NA	NA	18.666666666666668	NA	NA	NA	NA	NA	NA	NA
Ral	18	180	5.13.1	1	97	109	95	6.1	3.1	14.3	9.49	33.89	NA	NA	17.666666666666668	NA	NA	NA	NA	NA	NA	NA
Ral	18	216	5.14.1	1	98	118	82.5	6	2.8	12.7	7.07	22.02	NA	NA	22.666666666666668	NA	NA	NA	NA	NA	NA	NA
Ral	18	195	5.15.1	1	99	113	97.5	6	3.1	13.9	8.16	27.47	NA	NA	22.166666666666668	NA	NA	NA	NA	NA	NA	NA
Ral	18	LA95135	5.16.1	1	100	114	100	6.6	3.2	15.8	7.44	34.13	NA	NA	18.166666666666668	NA	NA	NA	NA	NA	NA	NA
Ral	18	198	5.17.1	1	101	109	85	6.7	2.9	14.3	6.42	27.67	NA	NA	21.5	NA	NA	NA	NA	NA	NA	NA
Ral	18	208	5.18.1	1	102	117	117.5	6.3	3.2	15.5	8.95	34.16	NA	NA	21.333333333333332	NA	NA	NA	NA	NA	NA	NA
Ral	18	200	5.19.1	1	103	114	85	6.3	2.9	13.6	8.53	26.74	NA	NA	19	NA	NA	NA	NA	NA	NA	NA
Ral	18	167	5.20.1	1	104	113	82.5	6.7	3.1	15.7	7.71	29.43	NA	NA	18.916666666666668	NA	NA	NA	NA	NA	NA	NA
Ral	18	MPV57	1.1.2	2	1	112	92.5	6	2.9	13	7.22	24.98	NA	NA	22	NA	NA	NA	NA	NA	NA	NA
Ral	18	290	1.2.2	2	2	110	92.5	6.3	2.8	13.3	6.94	25.05	NA	NA	21.666666666666668	NA	NA	NA	NA	NA	NA	NA
Ral	18	303	1.3.2	2	3	114	102.5	6	3.1	13.7	7.38	26.55	NA	NA	22	NA	NA	NA	NA	NA	NA	NA
Ral	18	LA95135	1.4.2	2	4	110	105	6.7	3.2	16	8.29	35.28	NA	NA	19.333333333333332	NA	NA	NA	NA	NA	NA	NA
Ral	18	293	1.5.2	2	5	109	90	6.4	3	14	7.93	27.16	NA	NA	21.166666666666668	NA	NA	NA	NA	NA	NA	NA
Ral	18	320	1.6.2	2	6	108	105	6.5	3.2	15.3	8.18	32.08	NA	NA	22.166666666666668	NA	NA	NA	NA	NA	NA	NA
Ral	18	342	1.7.2	2	7	114	90	6.3	3.1	14.5	5.89	27.65	NA	NA	23.5	NA	NA	NA	NA	NA	NA	NA
Ral	18	336	1.8.2	2	8	115	115	6.8	3.2	15.9	7.91	34.54	NA	NA	21.833333333333332	NA	NA	NA	NA	NA	NA	NA
Ral	18	295	1.9.2	2	9	109	82.5	6.3	2.9	13.4	7.78	26.46	NA	NA	20.5	NA	NA	NA	NA	NA	NA	NA
Ral	18	352	1.10.2	2	10	117	82.5	6.1	3.1	14.3	6.92	25.07	NA	NA	23.4	NA	NA	NA	NA	NA	NA	NA
Ral	18	316	1.11.2	2	11	113	110	6.1	3	13.6	8.21	26.48	NA	NA	25.166666666666668	NA	NA	NA	NA	NA	NA	NA
Ral	18	330	1.12.2	2	12	115	97.5	6.5	2.9	14.2	6.59	26.05	NA	NA	20.833333333333332	NA	NA	NA	NA	NA	NA	NA
Ral	18	358	1.13.2	2	13	113	110	6.5	3.3	16.2	8.54	36.81	NA	NA	20.166666666666668	NA	NA	NA	NA	NA	NA	NA
Ral	18	MPV57	1.14.2	2	14	112	95	6.3	3.2	14.7	8	30.89	NA	NA	20.2	NA	NA	NA	NA	NA	NA	NA
Ral	18	301	1.15.2	2	15	107	105	6.4	2.9	13.8	8.65	28.64	NA	NA	19.333333333333332	NA	NA	NA	NA	NA	NA	NA
Ral	18	305	1.16.2	2	16	109	85	6.4	3.1	14.7	8.08	29.38	NA	NA	20.666666666666668	NA	NA	NA	NA	NA	NA	NA
Ral	18	315	1.17.2	2	17	117	87.5	6.4	2.7	13.1	7.76	24.4	NA	NA	23.666666666666668	NA	NA	NA	NA	NA	NA	NA
Ral	18	357	1.18.2	2	18	108	95	6.9	3.4	16.9	7.84	37.51	NA	NA	20.4	NA	NA	NA	NA	NA	NA	NA
Ral	18	356	1.19.2	2	19	114	102.5	6.9	2.9	15	8.49	31.8	NA	NA	19.833333333333332	NA	NA	NA	NA	NA	NA	NA
Ral	18	338	1.20.2	2	20	113	115	6.4	3.2	15.2	7.35	32.67	NA	NA	22.333333333333332	NA	NA	NA	NA	NA	NA	NA
Ral	18	MPV57	2.1.2	2	22	114	95	6.1	2.9	13.3	7.79	26.23	NA	NA	21	NA	NA	NA	NA	NA	NA	NA
Ral	18	262	2.2.2	2	23	114	112.5	6.4	3.1	14.7	8.46	29.68	NA	NA	20.833333333333332	NA	NA	NA	NA	NA	NA	NA
Ral	18	233	2.3.2	2	24	110	80	6.4	3.1	14.8	8.55	31.2	NA	NA	18.5	NA	NA	NA	NA	NA	NA	NA
Ral	18	240	2.4.2	2	25	110	90	6.5	3.1	15.2	8.05	30.04	NA	NA	21.666666666666668	NA	NA	NA	NA	NA	NA	NA
Ral	18	217	2.5.2	2	26	113	110	6.9	3.2	16.4	8.55	36.38	NA	NA	19.5	NA	NA	NA	NA	NA	NA	NA
Ral	18	220	2.6.2	2	27	115	95	6.7	2.8	14.2	7.78	27.59	NA	NA	19.5	NA	NA	NA	NA	NA	NA	NA
Ral	18	235	2.7.2	2	28	115	87.5	5.9	2.8	12.2	7	21.74	NA	NA	20	NA	NA	NA	NA	NA	NA	NA
Ral	18	281	2.8.2	2	29	111	87.5	6.2	2.8	13	8.07	24.53	NA	NA	20.166666666666668	NA	NA	NA	NA	NA	NA	NA
Ral	18	222	2.9.2	2	30	120	112.5	6.3	3.1	14.7	8.56	30.57	NA	NA	20.5	NA	NA	NA	NA	NA	NA	NA
Ral	18	266	2.10.2	2	31	114	75	6.7	3.1	15.5	7.98	32.44	NA	NA	18	NA	NA	NA	NA	NA	NA	NA
Ral	18	256	2.11.2	2	32	114	100	6	3.1	14.1	8.52	29.18	NA	NA	19	NA	NA	NA	NA	NA	NA	NA
Ral	18	221	2.12.2	2	33	114	82.5	5.7	3	12.7	7.24	22.98	NA	NA	20	NA	NA	NA	NA	NA	NA	NA
Ral	18	244	2.13.2	2	34	109	90	6.7	3	15.1	8.81	31.92	NA	NA	18	NA	NA	NA	NA	NA	NA	NA
Ral	18	269	2.14.2	2	35	118	115	6.4	3.1	14.7	8.47	31.6	NA	NA	21.25	NA	NA	NA	NA	NA	NA	NA
Ral	18	MPV57	2.15.2	2	36	115	90	6.1	3	13.7	9.27	28.61	NA	NA	19.666666666666668	NA	NA	NA	NA	NA	NA	NA
Ral	18	255	2.16.2	2	37	114	85	6.2	3	13.9	8.06	28.18	NA	NA	19.5	NA	NA	NA	NA	NA	NA	NA
Ral	18	268	2.17.2	2	38	115	82.5	6.1	2.9	13.1	7.29	25.22	NA	NA	19.666666666666668	NA	NA	NA	NA	NA	NA	NA
Ral	18	239	2.18.2	2	39	114	110	6.2	3.3	15.1	8.52	33.02	NA	NA	19.166666666666668	NA	NA	NA	NA	NA	NA	NA
Ral	18	279	2.19.2	2	40	110	100	6.4	3.2	15.1	9.48	33.26	NA	NA	16.666666666666668	NA	NA	NA	NA	NA	NA	NA
Ral	18	282	2.20.2	2	41	107	95	6.9	3.2	16.4	7.56	36.17	NA	NA	17	NA	NA	NA	NA	NA	NA	NA
Ral	18	MPV57	3.1.2	2	43	115	97.5	6	2.9	13.1	8.66	25.77	NA	NA	18	NA	NA	NA	NA	NA	NA	NA
Ral	18	1	3.2.2	2	44	112	82.5	6.3	2.9	13.9	7.12	26.67	NA	NA	19	NA	NA	NA	NA	NA	NA	NA
Ral	18	19	3.3.2	2	45	109	85	6.5	2.9	14	7.56	27.69	NA	NA	19.166666666666668	NA	NA	NA	NA	NA	NA	NA
Ral	18	10	3.4.2	2	46	109	97.5	5.8	3	13	7.97	25.71	NA	NA	19.5	NA	NA	NA	NA	NA	NA	NA
Ral	18	17	3.5.2	2	47	114	97.5	6.4	3.2	15.1	7.68	29.88	NA	NA	22	NA	NA	NA	NA	NA	NA	NA
Ral	18	9	3.6.2	2	48	113	87.5	6.2	2.7	12.5	5.83	20.24	NA	NA	23	NA	NA	NA	NA	NA	NA	NA
Ral	18	14	3.7.2	2	49	112	95	6.6	2.9	14.3	7.26	26.02	NA	NA	20.833333333333332	NA	NA	NA	NA	NA	NA	NA
Ral	18	39	3.8.2	2	50	115	82.5	6.2	2.6	12.2	7.65	21.92	NA	NA	19.166666666666668	NA	NA	NA	NA	NA	NA	NA
Ral	18	12	3.9.2	2	51	109	87.5	6.6	3	14.8	8.74	31.1	NA	NA	NA	NA	NA	NA	NA	NA	NA	NA
Ral	18	11	3.10.2	2	52	110	97.5	6.1	3	13.4	7.06	25.67	NA	NA	NA	NA	NA	NA	NA	NA	NA	NA
Ral	18	18	3.11.2	2	53	109	75	6.3	2.9	13.7	7.83	26.1	NA	NA	18.666666666666668	NA	NA	NA	NA	NA	NA	NA
Ral	18	62	3.12.2	2	54	110	95	6.5	3	14.6	8.61	30.53	NA	NA	20.5	NA	NA	NA	NA	NA	NA	NA
Ral	18	26	3.13.2	2	55	115	105	6.6	3.1	15.3	8.82	31.17	NA	NA	20.5	NA	NA	NA	NA	NA	NA	NA
Ral	18	67	3.14.2	2	56	110	105	6.1	2.9	13.2	9.31	27.38	NA	NA	18.666666666666668	NA	NA	NA	NA	NA	NA	NA
Ral	18	70	3.15.2	2	57	112	87.5	6.2	3.1	14.2	6.85	27.73	NA	NA	23.166666666666668	NA	NA	NA	NA	NA	NA	NA
Ral	18	LA95135	3.16.2	2	58	110	100	6.6	3	14.9	8.49	30.99	NA	NA	17.666666666666668	NA	NA	NA	NA	NA	NA	NA
Ral	18	43	3.17.2	2	59	112	95	6.1	2.9	13.6	7.81	26.56	NA	NA	22.333333333333332	NA	NA	NA	NA	NA	NA	NA
Ral	18	42	3.18.2	2	60	113	80	6.6	2.8	13.7	7.21	24.61	NA	NA	19.666666666666668	NA	NA	NA	NA	NA	NA	NA
Ral	18	69	3.19.2	2	61	115	115	6.3	3	14.1	8.49	29.18	NA	NA	22.333333333333332	NA	NA	NA	NA	NA	NA	NA
Ral	18	41	3.20.2	2	62	113	87.5	5.9	2.9	12.8	7.8	25.16	NA	NA	23.166666666666668	NA	NA	NA	NA	NA	NA	NA
Ral	18	MPV57	4.1.2	2	64	110	95	6.1	3	13.6	7.82	27.44	NA	NA	20.5	NA	NA	NA	NA	NA	NA	NA
Ral	18	82	4.2.2	2	65	109	100	6.5	3.1	15.1	8.91	30.72	NA	NA	18.5	NA	NA	NA	NA	NA	NA	NA
Ral	18	76	4.3.2	2	66	119	92.5	6.1	2.8	12.8	7.34	25.4	NA	NA	21	NA	NA	NA	NA	NA	NA	NA
Ral	18	73	4.4.2	2	67	110	82.5	6.2	3	13.9	7.61	25.12	NA	NA	20.5	NA	NA	NA	NA	NA	NA	NA
Ral	18	79	4.5.2	2	68	118	92.5	6.3	3.2	14.7	8.67	31.53	NA	NA	22.833333333333332	NA	NA	NA	NA	NA	NA	NA
Ral	18	123	4.6.2	2	69	113	80	5.7	2.9	12.5	7.53	24.85	NA	NA	20.333333333333332	NA	NA	NA	NA	NA	NA	NA
Ral	18	84	4.7.2	2	70	110	95	6.3	3.1	14.8	9.33	32.06	NA	NA	18.166666666666668	NA	NA	NA	NA	NA	NA	NA
Ral	18	105	4.8.2	2	71	114	85	6.3	3.1	14.3	6.61	27.09	NA	NA	20.166666666666668	NA	NA	NA	NA	NA	NA	NA
Ral	18	75	4.9.2	2	72	110	90	6.4	3.1	14.9	7.3	28.52	NA	NA	22.666666666666668	NA	NA	NA	NA	NA	NA	NA
Ral	18	108	4.10.2	2	73	NA	75	NA	NA	NA	NA	NA	NA	NA	NA	NA	NA	NA	NA	NA	NA	NA
Ral	18	99	4.11.2	2	74	110	92.5	6.5	3.2	15.6	8.61	33.9	NA	NA	20.333333333333332	NA	NA	NA	NA	NA	NA	NA
Ral	18	129	4.12.2	2	75	115	70	6.6	2.8	13.5	7.6	25.76	NA	NA	21.5	NA	NA	NA	NA	NA	NA	NA
Ral	18	83	4.13.2	2	76	120	72.5	6.4	2.7	12.8	7.99	23.78	NA	NA	18.166666666666668	NA	NA	NA	NA	NA	NA	NA
Ral	18	104	4.14.2	2	77	108	92.5	6.6	3.1	15.5	8.59	32.91	NA	NA	19	NA	NA	NA	NA	NA	NA	NA
Ral	18	143	4.15.2	2	78	117	90	6.1	2.9	13.4	7.15	25.09	NA	NA	21.833333333333332	NA	NA	NA	NA	NA	NA	NA
Ral	18	96	4.16.2	2	79	116	112.5	6.1	3.2	14.5	8.34	30.55	NA	NA	23.166666666666668	NA	NA	NA	NA	NA	NA	NA
Ral	18	97	4.17.2	2	80	117	82.5	6.2	2.9	13.4	7.06	25.67	NA	NA	21.5	NA	NA	NA	NA	NA	NA	NA
Ral	18	135	4.18.2	2	81	108	90	6.7	3.1	15.2	8.31	31.96	NA	NA	18.333333333333332	NA	NA	NA	NA	NA	NA	NA
Ral	18	119	4.19.2	2	82	112	110	6.9	3.2	16.5	8.16	37.09	NA	NA	21.666666666666668	NA	NA	NA	NA	NA	NA	NA
Ral	18	134	4.20.2	2	83	110	90	6.1	3	13.6	7.62	28.01	NA	NA	20.666666666666668	NA	NA	NA	NA	NA	NA	NA
Ral	18	LA95135	5.1.2	2	85	113	100	6.6	3.1	15	7.53	31.51	NA	NA	17.5	NA	NA	NA	NA	NA	NA	NA
Ral	18	147	5.2.2	2	86	117	100	6.4	3.1	14.6	8.48	31.06	NA	NA	18.5	NA	NA	NA	NA	NA	NA	NA
Ral	18	170	5.3.2	2	87	108	97.5	6.5	3.2	15.5	8.72	33.03	NA	NA	18.5	NA	NA	NA	NA	NA	NA	NA
Ral	18	149	5.4.2	2	88	116	95	6.2	3.1	14.6	7.64	28.09	NA	NA	21.666666666666668	NA	NA	NA	NA	NA	NA	NA
Ral	18	185	5.5.2	2	89	110	85	6.6	3.2	16.1	7.91	35.31	NA	NA	18.166666666666668	NA	NA	NA	NA	NA	NA	NA
Ral	18	145	5.6.2	2	90	109	90	6.2	3	14.1	9.14	29.39	NA	NA	19	NA	NA	NA	NA	NA	NA	NA
Ral	18	169	5.7.2	2	91	114	95	6.6	3.1	15.4	8.6	31.05	NA	NA	19.833333333333332	NA	NA	NA	NA	NA	NA	NA
Ral	18	154	5.8.2	2	92	109	110	6.7	3.2	16.1	7.95	37.15	NA	NA	19.416666666666668	NA	NA	NA	NA	NA	NA	NA
Ral	18	151	5.9.2	2	93	110	107.5	6.3	3.3	15.5	8.95	34.29	NA	NA	19	NA	NA	NA	NA	NA	NA	NA
Ral	18	172	5.10.2	2	94	110	100	6.5	3.3	15.8	8.69	37.46	NA	NA	19	NA	NA	NA	NA	NA	NA	NA
Ral	18	146	5.11.2	2	95	110	92.5	6.5	3.1	15.1	8.42	30.62	NA	NA	19.166666666666668	NA	NA	NA	NA	NA	NA	NA
Ral	18	160	5.12.2	2	96	108	80	6.1	2.9	13.1	8.77	26.26	NA	NA	19.166666666666668	NA	NA	NA	NA	NA	NA	NA
Ral	18	156	5.13.2	2	97	108	107.5	6.4	3.2	15.1	8.15	34.39	NA	NA	20.5	NA	NA	NA	NA	NA	NA	NA
Ral	18	206	5.14.2	2	98	110	72.5	6.3	2.8	13.1	8.37	24.4	NA	NA	19.666666666666668	NA	NA	NA	NA	NA	NA	NA
Ral	18	162	5.15.2	2	99	112	97.5	6.6	3	14.8	8.24	28.32	NA	NA	21	NA	NA	NA	NA	NA	NA	NA
Ral	18	214	5.16.2	2	100	110	105	6.3	3.3	15.5	8.99	35.53	NA	NA	17.833333333333332	NA	NA	NA	NA	NA	NA	NA
Ral	18	215	5.17.2	2	101	112	110	6.1	3.2	14.5	9.99	32.75	NA	NA	20.666666666666668	NA	NA	NA	NA	NA	NA	NA
Ral	18	173	5.18.2	2	102	115	110	6	3.1	14	8.36	30.4	NA	NA	19.333333333333332	NA	NA	NA	NA	NA	NA	NA
Ral	18	205	5.19.2	2	103	112	115	6.1	3.2	14.7	8.08	32.45	NA	NA	19.666666666666668	NA	NA	NA	NA	NA	NA	NA
Ral	18	196	5.20.2	2	104	116	105	6.1	2.9	13.3	8.12	25.14	NA	NA	21.166666666666668	NA	NA	NA	NA	NA	NA	NA
Ral	18	LA95135	1.1.3	3	1	112	102.5	6.5	3.1	14.9	8.23	31.29	NA	NA	18.666666666666668	NA	NA	NA	NA	NA	NA	NA
Ral	18	307	1.2.3	3	2	109	72.5	6.5	2.9	14	7.3	26.74	NA	NA	19.833333333333332	NA	NA	NA	NA	NA	NA	NA
Ral	18	329	1.3.3	3	3	113	110	6.3	3.2	14.9	9.03	32.84	NA	NA	19.666666666666668	NA	NA	NA	NA	NA	NA	NA
Ral	18	292	1.4.3	3	4	113	112.5	6.4	3.1	14.9	8.58	34.46	NA	NA	19.666666666666668	NA	NA	NA	NA	NA	NA	NA
Ral	18	327	1.5.3	3	5	110	117.5	6.9	3.3	17.2	8.22	39.33	NA	NA	20	NA	NA	NA	NA	NA	NA	NA
Ral	18	294	1.6.3	3	6	108	100	6.4	3.1	15.1	8.61	33.5	NA	NA	20.166666666666668	NA	NA	NA	NA	NA	NA	NA
Ral	18	335	1.7.3	3	7	114	120	6.2	3.4	16.1	8.95	39.6	NA	NA	19.333333333333332	NA	NA	NA	NA	NA	NA	NA
Ral	18	325	1.8.3	3	8	107	100	6.3	2.9	13.7	8.62	26.94	NA	NA	19.666666666666668	NA	NA	NA	NA	NA	NA	NA
Ral	18	331	1.9.3	3	9	112	100	6.4	3	14.4	7.56	29.53	NA	NA	22	NA	NA	NA	NA	NA	NA	NA
Ral	18	297	1.10.3	3	10	115	95	6.8	3.1	15.6	7.21	31.21	NA	NA	20.916666666666668	NA	NA	NA	NA	NA	NA	NA
Ral	18	291	1.11.3	3	11	111	97.5	6.6	3.2	15.7	8.54	33.1	NA	NA	21.333333333333332	NA	NA	NA	NA	NA	NA	NA
Ral	18	LA95135	1.12.3	3	12	112	110	6.6	3.2	15.7	7.8	33.77	NA	NA	18	NA	NA	NA	NA	NA	NA	NA
Ral	18	296	1.13.3	3	13	109	85	6.3	2.8	13.1	7.34	25.66	NA	NA	20.833333333333332	NA	NA	NA	NA	NA	NA	NA
Ral	18	328	1.14.3	3	14	110	87.5	6	2.9	13	7.99	26.63	NA	NA	19.8	NA	NA	NA	NA	NA	NA	NA
Ral	18	354	1.15.3	3	15	115	117.5	6.1	3.3	14.9	8.06	33.72	NA	NA	20.5	NA	NA	NA	NA	NA	NA	NA
Ral	18	323	1.16.3	3	16	108	90	5.9	3	13	8.11	25.99	NA	NA	20.166666666666668	NA	NA	NA	NA	NA	NA	NA
Ral	18	347	1.17.3	3	17	114	95	6	2.9	12.9	7.78	25.02	NA	NA	21.833333333333332	NA	NA	NA	NA	NA	NA	NA
Ral	18	355	1.18.3	3	18	108	85	6.4	2.9	13.5	7.36	24.95	NA	NA	18.833333333333332	NA	NA	NA	NA	NA	NA	NA
Ral	18	318	1.19.3	3	19	108	110	6.3	3.2	15.2	9.04	35.73	NA	NA	17.833333333333332	NA	NA	NA	NA	NA	NA	NA
Ral	18	MPV57	1.20.3	3	20	112	97.5	6.1	3	13.7	8.38	27.93	NA	NA	21	NA	NA	NA	NA	NA	NA	NA
Ral	18	LA95135	2.1.3	3	22	108	100	6.7	3.2	15.7	8.03	34.17	NA	NA	17.333333333333332	NA	NA	NA	NA	NA	NA	NA
Ral	18	229	2.2.3	3	23	110	80	6.5	2.8	13.8	7.42	27.48	NA	NA	18.833333333333332	NA	NA	NA	NA	NA	NA	NA
Ral	18	245	2.3.3	3	24	112	95	6	3.1	13.6	8.16	26.93	NA	NA	23.666666666666668	NA	NA	NA	NA	NA	NA	NA
Ral	18	261	2.4.3	3	25	108	105	6.2	3.4	16	8.35	38.3	NA	NA	18.5	NA	NA	NA	NA	NA	NA	NA
Ral	18	267	2.5.3	3	26	117	75	6.6	3	14.8	7.95	28.6	NA	NA	20.666666666666668	NA	NA	NA	NA	NA	NA	NA
Ral	18	237	2.6.3	3	27	107	92.5	6.1	3	14	8.69	31.49	NA	NA	16.333333333333332	NA	NA	NA	NA	NA	NA	NA
Ral	18	274	2.7.3	3	28	109	110	6.5	3.2	15.7	8.84	34.4	NA	NA	18.833333333333332	NA	NA	NA	NA	NA	NA	NA
Ral	18	273	2.8.3	3	29	112	100	6.9	3.2	16.8	7.38	35.14	NA	NA	19	NA	NA	NA	NA	NA	NA	NA
Ral	18	LA95135	2.9.3	3	30	115	95	6.5	3.1	14.9	7.15	30.17	NA	NA	18.833333333333332	NA	NA	NA	NA	NA	NA	NA
Ral	18	231	2.10.3	3	31	109	82.5	6	3.2	14.2	8.85	31.05	NA	NA	20	NA	NA	NA	NA	NA	NA	NA
Ral	18	234	2.11.3	3	32	120	90	6.4	2.9	13.8	8.24	26.75	NA	NA	22.5	NA	NA	NA	NA	NA	NA	NA
Ral	18	249	2.12.3	3	33	114	80	6.3	2.8	13.2	7.38	24.12	NA	NA	18.5	NA	NA	NA	NA	NA	NA	NA
Ral	18	236	2.13.3	3	34	116	110	6.5	3.6	17.5	8.58	41.85	NA	NA	21.166666666666668	NA	NA	NA	NA	NA	NA	NA
Ral	18	283	2.14.3	3	35	119	85	6.4	3	14.2	7.32	29.28	NA	NA	21.333333333333332	NA	NA	NA	NA	NA	NA	NA
Ral	18	278	2.15.3	3	36	107	85	6.1	3	13.6	8.6	28.38	NA	NA	18.666666666666668	NA	NA	NA	NA	NA	NA	NA
Ral	18	225	2.16.3	3	37	109	87.5	6.4	3	14.4	7.23	31.16	NA	NA	18.166666666666668	NA	NA	NA	NA	NA	NA	NA
Ral	18	286	2.17.3	3	38	109	95	6.3	3	14.1	8.54	30.18	NA	NA	18.166666666666668	NA	NA	NA	NA	NA	NA	NA
Ral	18	230	2.18.3	3	39	109	80	6.3	2.7	12.8	7.16	22.59	NA	NA	16.333333333333332	NA	NA	NA	NA	NA	NA	NA
Ral	18	254	2.19.3	3	40	115	92.5	6.3	3	14.3	7.42	26.13	NA	NA	20.583333333333332	NA	NA	NA	NA	NA	NA	NA
Ral	18	277	2.20.3	3	41	116	87.5	6.4	2.9	14.1	6.92	27.24	NA	NA	18.666666666666668	NA	NA	NA	NA	NA	NA	NA
Ral	18	LA95135	3.1.3	3	43	113	105	6.5	3.1	15.2	8.52	32.27	NA	NA	16.5	NA	NA	NA	NA	NA	NA	NA
Ral	18	7	3.2.3	3	44	108	87.5	6.8	3	15.2	7.62	29.77	NA	NA	20.833333333333332	NA	NA	NA	NA	NA	NA	NA
Ral	18	25	3.3.3	3	45	112	95	6.3	3	14	8.83	28.67	NA	NA	19.333333333333332	NA	NA	NA	NA	NA	NA	NA
Ral	18	2	3.4.3	3	46	116	98	6.1	2.8	12.7	8.68	25.38	NA	NA	18.666666666666668	NA	NA	NA	NA	NA	NA	NA
Ral	18	27	3.5.3	3	47	111	95	6.2	3	13.7	8.58	27.95	NA	NA	19.333333333333332	NA	NA	NA	NA	NA	NA	NA
Ral	18	5	3.6.3	3	48	114	112.5	6.4	3.2	15.3	9.68	34.57	NA	NA	NA	NA	NA	NA	NA	NA	NA	NA
Ral	18	36	3.7.3	3	49	107	105	6.4	2.9	13.9	8.69	27.07	NA	NA	19.666666666666668	NA	NA	NA	NA	NA	NA	NA
Ral	18	21	3.8.3	3	50	108	95	5.9	2.9	12.5	7.4	22.36	NA	NA	21.166666666666668	NA	NA	NA	NA	NA	NA	NA
Ral	18	LA95135	3.9.3	3	51	109	100	6.5	3	14.5	8.49	31.21	NA	NA	18.166666666666668	NA	NA	NA	NA	NA	NA	NA
Ral	18	47	3.10.3	3	52	108	100	6.5	3.1	15.1	7.33	31.46	NA	NA	NA	NA	NA	NA	NA	NA	NA	NA
Ral	18	46	3.11.3	3	53	113	115	7	3.3	17.4	8.64	39.82	NA	NA	19.333333333333332	NA	NA	NA	NA	NA	NA	NA
Ral	18	31	3.12.3	3	54	115	100	6.3	3.1	14.4	8.12	28.39	NA	NA	20.166666666666668	NA	NA	NA	NA	NA	NA	NA
Ral	18	59	3.13.3	3	55	113	107.5	6.5	3	14.6	9.43	31.12	NA	NA	21.333333333333332	NA	NA	NA	NA	NA	NA	NA
Ral	18	52	3.14.3	3	56	113	115	6.8	3.3	16.9	8.89	38.15	NA	NA	20	NA	NA	NA	NA	NA	NA	NA
Ral	18	34	3.15.3	3	57	113	95	6.6	3	14.6	8.11	29.71	NA	NA	21	NA	NA	NA	NA	NA	NA	NA
Ral	18	66	3.16.3	3	58	108	95	5.8	3.2	13.8	6.63	29.34	NA	NA	20	NA	NA	NA	NA	NA	NA	NA
Ral	18	60	3.17.3	3	59	108	87.5	6.4	3.1	14.5	6.75	30.27	NA	NA	21	NA	NA	NA	NA	NA	NA	NA
Ral	18	32	3.18.3	3	60	110	85	6.2	2.7	12.5	8.37	23.71	NA	NA	17.666666666666668	NA	NA	NA	NA	NA	NA	NA
Ral	18	65	3.19.3	3	61	109	100	6.6	3.1	15	9.01	31.18	NA	NA	20.833333333333332	NA	NA	NA	NA	NA	NA	NA
Ral	18	63	3.20.3	3	62	108	92.5	6.3	3.1	14.6	8.28	31.85	NA	NA	19.25	NA	NA	NA	NA	NA	NA	NA
Ral	18	LA95135	4.1.3	3	64	111	100	6.6	3.1	15.2	9.19	33.91	NA	NA	17.833333333333332	NA	NA	NA	NA	NA	NA	NA
Ral	18	90	4.2.3	3	65	112	90	6	3	13.6	8.84	28.7	NA	NA	21.333333333333332	NA	NA	NA	NA	NA	NA	NA
Ral	18	111	4.3.3	3	66	116	110	6.1	3.1	13.8	7.75	29.69	NA	NA	21.166666666666668	NA	NA	NA	NA	NA	NA	NA
Ral	18	92	4.4.3	3	67	110	82.5	6.1	3	13.5	7.98	26.16	NA	NA	22.666666666666668	NA	NA	NA	NA	NA	NA	NA
Ral	18	91	4.5.3	3	68	112	75	6.3	2.9	14	7.42	24.57	NA	NA	21	NA	NA	NA	NA	NA	NA	NA
Ral	18	88	4.6.3	3	69	117	85	6.5	3.1	14.8	7.58	30.2	NA	NA	18.833333333333332	NA	NA	NA	NA	NA	NA	NA
Ral	18	106	4.7.3	3	70	117	117.5	6.2	3	13.8	9.19	29.93	NA	NA	21.166666666666668	NA	NA	NA	NA	NA	NA	NA
Ral	18	110	4.8.3	3	71	NA	NA	6.3	3.3	15.6	9.02	34.56	NA	NA	NA	NA	NA	NA	NA	NA	NA	NA
Ral	18	87	4.9.3	3	72	110	72.5	6.4	3	14.1	7.05	26.4	NA	NA	20.833333333333332	NA	NA	NA	NA	NA	NA	NA
Ral	18	115	4.10.3	3	73	109	105	6.6	3.2	15.9	8.55	35.77	NA	NA	19.666666666666668	NA	NA	NA	NA	NA	NA	NA
Ral	18	77	4.11.3	3	74	115	80	5.8	2.9	12.5	7.72	23.54	NA	NA	21.833333333333332	NA	NA	NA	NA	NA	NA	NA
Ral	18	118	4.12.3	3	75	119	92.5	6.4	2.8	13.2	7.69	24.97	NA	NA	20.666666666666668	NA	NA	NA	NA	NA	NA	NA
Ral	18	98	4.13.3	3	76	110	75	6.1	3.2	14.7	7.45	28.11	NA	NA	20.666666666666668	NA	NA	NA	NA	NA	NA	NA
Ral	18	140	4.14.3	3	77	108	97.5	6.7	3.1	15.6	8.78	34.43	NA	NA	20.833333333333332	NA	NA	NA	NA	NA	NA	NA
Ral	18	124	4.15.3	3	78	112	100	6.2	2.9	13.6	7.68	26.12	NA	NA	23.666666666666668	NA	NA	NA	NA	NA	NA	NA
Ral	18	120	4.16.3	3	79	113	100	6.7	3	15	8.38	31.74	NA	NA	18.333333333333332	NA	NA	NA	NA	NA	NA	NA
Ral	18	128	4.17.3	3	80	109	102.5	6.2	3.4	15.9	8.58	38.65	NA	NA	18	NA	NA	NA	NA	NA	NA	NA
Ral	18	136	4.18.3	3	81	110	100	6.7	3.1	15.4	8.77	31.55	NA	NA	22.166666666666668	NA	NA	NA	NA	NA	NA	NA
Ral	18	MPV57	4.19.3	3	82	110	95	6.2	3.1	14.2	7.86	29.11	NA	NA	20.833333333333332	NA	NA	NA	NA	NA	NA	NA
Ral	18	121	4.20.3	3	83	109	80	6.1	3	13.8	6.99	25.99	NA	NA	19	NA	NA	NA	NA	NA	NA	NA
Ral	18	MPV57	5.1.3	3	85	113	92.5	6.1	3	13.6	8.83	27.59	NA	NA	16.833333333333332	NA	NA	NA	NA	NA	NA	NA
Ral	18	153	5.2.3	3	86	109	110	6.3	3.1	14.8	9.38	31.8	NA	NA	19.166666666666668	NA	NA	NA	NA	NA	NA	NA
Ral	18	158	5.3.3	3	87	110	90	6.8	3.3	16.6	9	36.89	NA	NA	20.333333333333332	NA	NA	NA	NA	NA	NA	NA
Ral	18	184	5.4.3	3	88	111	92.5	6.2	3.3	15.2	9.38	32.23	NA	NA	22.666666666666668	NA	NA	NA	NA	NA	NA	NA
Ral	18	148	5.5.3	3	89	110	80	6.5	3	14.4	8.59	29.52	NA	NA	19.666666666666668	NA	NA	NA	NA	NA	NA	NA
Ral	18	176	5.6.3	3	90	115	82.5	5.8	2.8	12.3	7.53	22.48	NA	NA	20.5	NA	NA	NA	NA	NA	NA	NA
Ral	18	MPV57	5.7.3	3	91	112	92.5	6.1	3	13.9	9.02	28.82	NA	NA	21.166666666666668	NA	NA	NA	NA	NA	NA	NA
Ral	18	182	5.8.3	3	92	115	107.5	6.7	3.3	16.4	8.91	37.28	NA	NA	19.333333333333332	NA	NA	NA	NA	NA	NA	NA
Ral	18	155	5.9.3	3	93	109	97.5	6	3	13.6	7.34	26.99	NA	NA	22.833333333333332	NA	NA	NA	NA	NA	NA	NA
Ral	18	193	5.10.3	3	94	108	77.5	6.4	3.1	14.9	8.94	29.03	NA	NA	17.5	NA	NA	NA	NA	NA	NA	NA
Ral	18	201	5.11.3	3	95	108	72.5	6.2	3	14.2	7.77	28.78	NA	NA	20.166666666666668	NA	NA	NA	NA	NA	NA	NA
Ral	18	181	5.12.3	3	96	110	87.5	6.3	3.1	14.7	8.59	30.68	NA	NA	20.5	NA	NA	NA	NA	NA	NA	NA
Ral	18	211	5.13.3	3	97	110	87.5	6	3	13.7	7.02	30.39	NA	NA	18.333333333333332	NA	NA	NA	NA	NA	NA	NA
Ral	18	177	5.14.3	3	98	114	85	6.2	2.9	13.4	7.2	24.32	NA	NA	21	NA	NA	NA	NA	NA	NA	NA
Ral	18	199	5.15.3	3	99	117	110	6.3	3	14.1	7.86	27.29	NA	NA	23.333333333333332	NA	NA	NA	NA	NA	NA	NA
Ral	18	186	5.16.3	3	100	108	80	6.6	2.9	14.2	9.42	29.53	NA	NA	16.833333333333332	NA	NA	NA	NA	NA	NA	NA
Ral	18	204	5.17.3	3	101	113	97.5	6	3.1	14	7.89	28.08	NA	NA	19.833333333333332	NA	NA	NA	NA	NA	NA	NA
Ral	18	178	5.18.3	3	102	107	97.5	7	3.2	16.3	9.08	36.18	NA	NA	19	NA	NA	NA	NA	NA	NA	NA
Ral	18	197	5.19.3	3	103	112	115	7	3.2	16.8	8.84	37.46	NA	NA	16.666666666666668	NA	NA	NA	NA	NA	NA	NA
Ral	18	202	5.20.3	3	104	114	110	6.7	3.3	16.4	8.17	37.14	NA	NA	19	NA	NA	NA	NA	NA	NA	NA
Ral	18	MPV57	1.1.4	4	1	113	92.5	6.2	3	13.9	7.76	26.58	NA	NA	22.666666666666668	NA	NA	NA	NA	NA	NA	NA
Ral	18	317	1.2.4	4	2	107	77.5	6	3	13.7	7.8	25.91	NA	NA	20.5	NA	NA	NA	NA	NA	NA	NA
Ral	18	308	1.3.4	4	3	111	87.5	5.8	2.8	12.1	7.98	22.74	NA	NA	21	NA	NA	NA	NA	NA	NA	NA
Ral	18	333	1.4.4	4	4	116	97.5	5.8	2.8	12	8.27	21.99	NA	NA	22.333333333333332	NA	NA	NA	NA	NA	NA	NA
Ral	18	309	1.5.4	4	5	116	122.5	6.2	3.1	14.2	8.16	31.03	NA	NA	20.416666666666668	NA	NA	NA	NA	NA	NA	NA
Ral	18	332	1.6.4	4	6	108	75	6.3	2.9	13.5	7.05	26.01	NA	NA	21.166666666666668	NA	NA	NA	NA	NA	NA	NA
Ral	18	326	1.7.4	4	7	117	130	6.6	3.1	15.3	9.08	34.14	NA	NA	21.666666666666668	NA	NA	NA	NA	NA	NA	NA
Ral	18	MPV57	1.8.4	4	8	113	95	6.2	3.1	14.1	8.45	29.04	NA	NA	22.6	NA	NA	NA	NA	NA	NA	NA
Ral	18	337	1.9.4	4	9	107	107.5	6.5	3.1	15	8.26	32.65	NA	NA	20.916666666666668	NA	NA	NA	NA	NA	NA	NA
Ral	18	300	1.10.4	4	10	107	112.5	6.8	3.4	17.4	8.37	40.43	NA	NA	19.833333333333332	NA	NA	NA	NA	NA	NA	NA
Ral	18	340	1.11.4	4	11	112	90	6.3	2.8	13.5	7.21	23.95	NA	NA	22	NA	NA	NA	NA	NA	NA	NA
Ral	18	321	1.12.4	4	12	107	102.5	6.2	3	13.8	8.89	27.69	NA	NA	20	NA	NA	NA	NA	NA	NA	NA
Ral	18	343	1.13.4	4	13	108	105	6.6	3.3	16.2	9	36.59	NA	NA	21.333333333333332	NA	NA	NA	NA	NA	NA	NA
Ral	18	350	1.14.4	4	14	112	102.5	6.3	3.1	14.6	8.36	30.74	NA	NA	21.833333333333332	NA	NA	NA	NA	NA	NA	NA
Ral	18	313	1.15.4	4	15	116	97.5	6.3	2.9	13.8	7.46	24.87	NA	NA	24.333333333333332	NA	NA	NA	NA	NA	NA	NA
Ral	18	345	1.16.4	4	16	113	112.5	6.3	3.4	16.1	7.31	35.31	NA	NA	20.666666666666668	NA	NA	NA	NA	NA	NA	NA
Ral	18	349	1.17.4	4	17	110	100	6.5	3.3	16	8.43	35.42	NA	NA	21.666666666666668	NA	NA	NA	NA	NA	NA	NA
Ral	18	LA95135	1.18.4	4	18	110	105	6.7	3.1	15.3	8.03	33.46	NA	NA	18	NA	NA	NA	NA	NA	NA	NA
Ral	18	351	1.19.4	4	19	115	117.5	6.9	3.4	17.2	9.06	41	NA	NA	19.666666666666668	NA	NA	NA	NA	NA	NA	NA
Ral	18	346	1.20.4	4	20	113	92.5	5.9	3.1	13.6	7.38	27.13	NA	NA	23	NA	NA	NA	NA	NA	NA	NA
Ral	18	MPV57	2.1.4	4	22	114	95	6.2	3.1	14.1	8.48	28.55	NA	NA	21.833333333333332	NA	NA	NA	NA	NA	NA	NA
Ral	18	263	2.2.4	4	23	113	102.5	6.2	3	14.2	7.89	27.3	NA	NA	22.5	NA	NA	NA	NA	NA	NA	NA
Ral	18	219	2.3.4	4	24	108	100	6.3	3.2	15	7.57	31.81	NA	NA	20.5	NA	NA	NA	NA	NA	NA	NA
Ral	18	232	2.4.4	4	25	109	92.5	6.5	3.2	15.5	8.21	34.64	NA	NA	18.90909090909091	NA	NA	NA	NA	NA	NA	NA
Ral	18	223	2.5.4	4	26	116	95	6.1	2.9	13	6.81	24.15	NA	NA	23.166666666666668	NA	NA	NA	NA	NA	NA	NA
Ral	18	275	2.6.4	4	27	108	97.5	6.4	3.1	14.9	9.32	33.65	NA	NA	21.166666666666668	NA	NA	NA	NA	NA	NA	NA
Ral	18	246	2.7.4	4	28	110	97.5	5.9	3.1	13.5	7.49	27.24	NA	NA	22.666666666666668	NA	NA	NA	NA	NA	NA	NA
Ral	18	MPV57	2.8.4	4	29	112	90	6.2	3.1	14	9.17	28.75	NA	NA	20.666666666666668	NA	NA	NA	NA	NA	NA	NA
Ral	18	260	2.9.4	4	30	117	80	6	3	13.3	6.15	25.52	NA	NA	20.416666666666668	NA	NA	NA	NA	NA	NA	NA
Ral	18	247	2.10.4	4	31	109	77.5	6.2	3.1	14.1	8.29	31.05	NA	NA	17.833333333333332	NA	NA	NA	NA	NA	NA	NA
Ral	18	270	2.11.4	4	32	108	82.5	6.5	2.9	14	6.39	26.74	NA	NA	21.333333333333332	NA	NA	NA	NA	NA	NA	NA
Ral	18	LA95135	2.12.4	4	33	110	100	6.8	3.3	17	7.26	38.01	NA	NA	19	NA	NA	NA	NA	NA	NA	NA
Ral	18	257	2.13.4	4	34	106	90	6.6	3.1	15.3	8.74	31.1	NA	NA	18.666666666666668	NA	NA	NA	NA	NA	NA	NA
Ral	18	238	2.14.4	4	35	115	87.5	6.2	2.9	13.9	7.1	25.09	NA	NA	21.5	NA	NA	NA	NA	NA	NA	NA
Ral	18	265	2.15.4	4	36	108	70	6.6	3	14.4	8.27	29.64	NA	NA	19.5	NA	NA	NA	NA	NA	NA	NA
Ral	18	271	2.16.4	4	37	115	95	6.7	3	15.2	8.06	30.07	NA	NA	19.833333333333332	NA	NA	NA	NA	NA	NA	NA
Ral	18	252	2.17.4	4	38	110	80	6.1	3	13.7	6.42	24.5	NA	NA	22.75	NA	NA	NA	NA	NA	NA	NA
Ral	18	276	2.18.4	4	39	114	92.5	5.9	3.2	13.9	7.83	29.66	NA	NA	19.5	NA	NA	NA	NA	NA	NA	NA
Ral	18	284	2.19.4	4	40	108	97.5	6.4	3.2	15.4	8.57	32.84	NA	NA	18.666666666666668	NA	NA	NA	NA	NA	NA	NA
Ral	18	258	2.20.4	4	41	113	95	6.6	2.9	14.6	8.18	28.4	NA	NA	18.833333333333332	NA	NA	NA	NA	NA	NA	NA
Ral	18	MPV57	3.1.4	4	43	113	92.5	6.1	2.9	13.3	8.45	26.24	NA	NA	20.833333333333332	NA	NA	NA	NA	NA	NA	NA
Ral	18	3	3.2.4	4	44	120	92.5	6.4	2.8	13.3	7.68	24.3	NA	NA	22.666666666666668	NA	NA	NA	NA	NA	NA	NA
Ral	18	4	3.3.4	4	45	109	75	6.6	2.9	14.1	8.16	27.76	NA	NA	17.666666666666668	NA	NA	NA	NA	NA	NA	NA
Ral	18	23	3.4.4	4	46	115	90	6.5	2.9	14.1	6.99	25.14	NA	NA	22.833333333333332	NA	NA	NA	NA	NA	NA	NA
Ral	18	16	3.5.4	4	47	115	107.5	6.4	3.1	14.7	8.97	32.15	NA	NA	18	NA	NA	NA	NA	NA	NA	NA
Ral	18	28	3.6.4	4	48	117	77.5	6.3	2.8	13.2	8.32	26.5	NA	NA	NA	NA	NA	NA	NA	NA	NA	NA
Ral	18	33	3.7.4	4	49	108	112.5	6.5	3	14.6	8.88	30.62	NA	NA	21	NA	NA	NA	NA	NA	NA	NA
Ral	18	20	3.8.4	4	50	113	92.5	6.2	3.1	14.3	7.33	25.81	NA	NA	22.333333333333332	NA	NA	NA	NA	NA	NA	NA
Ral	18	37	3.9.4	4	51	114	85	6.2	2.8	13.2	6.58	21.09	NA	NA	23.166666666666668	NA	NA	NA	NA	NA	NA	NA
Ral	18	30	3.10.4	4	52	108	85	6.5	2.8	13.4	7.83	26.72	NA	NA	18.833333333333332	NA	NA	NA	NA	NA	NA	NA
Ral	18	44	3.11.4	4	53	109	102.5	6.2	3.1	14.3	7.41	28.17	NA	NA	19.333333333333332	NA	NA	NA	NA	NA	NA	NA
Ral	18	29	3.12.4	4	54	116	90	5.8	2.8	12.1	7.54	22.11	NA	NA	22.333333333333332	NA	NA	NA	NA	NA	NA	NA
Ral	18	51	3.13.4	4	55	107	95	6.7	3.2	16.2	8.95	37.14	NA	NA	19	NA	NA	NA	NA	NA	NA	NA
Ral	18	35	3.14.4	4	56	106	102.5	6.4	3.1	14.9	8.81	32.15	NA	NA	20.166666666666668	NA	NA	NA	NA	NA	NA	NA
Ral	18	49	3.15.4	4	57	110	107.5	6.7	3.1	15.1	9.33	32.62	NA	NA	20.166666666666668	NA	NA	NA	NA	NA	NA	NA
Ral	18	48	3.16.4	4	58	107	102.5	6.6	3.3	16.5	7.54	37.33	NA	NA	20.2	NA	NA	NA	NA	NA	NA	NA
Ral	18	38	3.17.4	4	59	106	105	6.6	3.3	16.3	8.58	37.47	NA	NA	18.166666666666668	NA	NA	NA	NA	NA	NA	NA
Ral	18	53	3.18.4	4	60	108	100	6.4	3.2	15.3	10.05	32.95	NA	NA	20.166666666666668	NA	NA	NA	NA	NA	NA	NA
Ral	18	MPV57	3.19.4	4	61	112	92.5	6.1	3	13.8	7.19	26.53	NA	NA	22.333333333333332	NA	NA	NA	NA	NA	NA	NA
Ral	18	50	3.20.4	4	62	112	87.5	6.7	3	15	7.06	28.7	NA	NA	20.666666666666668	NA	NA	NA	NA	NA	NA	NA
Ral	18	MPV57	4.1.4	4	64	111	95	6.3	3.1	14.5	9.28	29	NA	NA	20.833333333333332	NA	NA	NA	NA	NA	NA	NA
Ral	18	78	4.2.4	4	65	115	112.5	6.4	3.1	15.1	9.22	33.05	NA	NA	22.333333333333332	NA	NA	NA	NA	NA	NA	NA
Ral	18	LA95135	4.3.4	4	66	113	102.5	6.4	3	14.6	8.31	30.55	NA	NA	19.833333333333332	NA	NA	NA	NA	NA	NA	NA
Ral	18	85	4.4.4	4	67	114	107.5	6.3	3.2	15.3	7.46	32.43	NA	NA	21.5	NA	NA	NA	NA	NA	NA	NA
Ral	18	113	4.5.4	4	68	112	80	6.6	3	14.8	8.39	29.54	NA	NA	20.166666666666668	NA	NA	NA	NA	NA	NA	NA
Ral	18	74	4.6.4	4	69	109	95	6.6	3.1	15.7	8.6	33.08	NA	NA	22.666666666666668	NA	NA	NA	NA	NA	NA	NA
Ral	18	116	4.7.4	4	70	113	72.5	6.2	2.8	13.2	7.4	22.56	NA	NA	19.5	NA	NA	NA	NA	NA	NA	NA
Ral	18	81	4.8.4	4	71	115	92.5	6	3.1	14	6.91	27.31	NA	NA	22.833333333333332	NA	NA	NA	NA	NA	NA	NA
Ral	18	126	4.9.4	4	72	114	100	6.5	3	14.3	8.92	30.44	NA	NA	18.833333333333332	NA	NA	NA	NA	NA	NA	NA
Ral	18	94	4.10.4	4	73	114	112.5	6.7	3.1	15.6	8.48	34.47	NA	NA	17.636363636363637	NA	NA	NA	NA	NA	NA	NA
Ral	18	125	4.11.4	4	74	111	70	5.6	2.9	12.1	7.88	23.24	NA	NA	22.833333333333332	NA	NA	NA	NA	NA	NA	NA
Ral	18	93	4.12.4	4	75	109	107.5	7.1	3.4	17.7	7.06	43.05	NA	NA	17.833333333333332	NA	NA	NA	NA	NA	NA	NA
Ral	18	131	4.13.4	4	76	120	100	6.4	3.3	15.6	7.77	34.53	NA	NA	22.5	NA	NA	NA	NA	NA	NA	NA
Ral	18	LA95135	4.14.4	4	77	113	95	6.7	3.2	16.1	8.76	34.76	NA	NA	19.833333333333332	NA	NA	NA	NA	NA	NA	NA
Ral	18	141	4.15.4	4	78	110	110	6.9	3.2	16.8	8.01	38.88	NA	NA	20.5	NA	NA	NA	NA	NA	NA	NA
Ral	18	103	4.16.4	4	79	108	95	6.6	2.9	14.4	7.24	29.79	NA	NA	18.666666666666668	NA	NA	NA	NA	NA	NA	NA
Ral	18	133	4.17.4	4	80	114	105	6.3	3.1	14.9	7.88	28.76	NA	NA	23.333333333333332	NA	NA	NA	NA	NA	NA	NA
Ral	18	80	4.18.4	4	81	113	85	6.6	2.9	14.2	7.33	25.63	NA	NA	20.833333333333332	NA	NA	NA	NA	NA	NA	NA
Ral	18	132	4.19.4	4	82	109	105	6.4	3.3	15.7	9.14	36.85	NA	NA	20.166666666666668	NA	NA	NA	NA	NA	NA	NA
Ral	18	130	4.20.4	4	83	112	85	6.2	2.9	13.4	8.08	26.06	NA	NA	21.166666666666668	NA	NA	NA	NA	NA	NA	NA
Ral	18	LA95135	5.1.4	4	85	111	95	6.5	3.2	15.6	6.77	32.09	NA	NA	17.833333333333332	NA	NA	NA	NA	NA	NA	NA
Ral	18	168	5.2.4	4	86	108	95	6.5	3.2	15.3	10.08	35.37	NA	NA	17.833333333333332	NA	NA	NA	NA	NA	NA	NA
Ral	18	174	5.3.4	4	87	109	62.5	6.5	2.9	13.7	6.77	26.65	NA	NA	19.166666666666668	NA	NA	NA	NA	NA	NA	NA
Ral	18	LA95135	5.4.4	4	88	113	95	6.7	3.3	16.5	9.19	36.47	NA	NA	19.166666666666668	NA	NA	NA	NA	NA	NA	NA
Ral	18	189	5.5.4	4	89	117	105	5.9	3	13.1	8.38	25.24	NA	NA	19.833333333333332	NA	NA	NA	NA	NA	NA	NA
Ral	18	157	5.6.4	4	90	108	110	6.6	3.2	15.7	9.18	35.17	NA	NA	19.5	NA	NA	NA	NA	NA	NA	NA
Ral	18	159	5.7.4	4	91	113	92.5	6.7	3.1	15.8	7.1	31	NA	NA	21.666666666666668	NA	NA	NA	NA	NA	NA	NA
Ral	18	163	5.8.4	4	92	117	80	6.1	3	13.8	8.42	27.07	NA	NA	21.5	NA	NA	NA	NA	NA	NA	NA
Ral	18	166	5.9.4	4	93	110	105	6.7	3.4	16.8	9.25	37.6	NA	NA	19.333333333333332	NA	NA	NA	NA	NA	NA	NA
Ral	18	183	5.10.4	4	94	114	80	6.2	2.9	13.8	7.82	26.97	NA	NA	22.333333333333332	NA	NA	NA	NA	NA	NA	NA
Ral	18	150	5.11.4	4	95	115	75	6.4	2.8	13.5	7.59	25.22	NA	NA	22	NA	NA	NA	NA	NA	NA	NA
Ral	18	207	5.12.4	4	96	109	75	6.4	3	14.5	8.66	27.94	NA	NA	19.5	NA	NA	NA	NA	NA	NA	NA
Ral	18	MPV57	5.13.4	4	97	113	95	6.2	3.1	14.5	9.07	29.84	NA	NA	21.666666666666668	NA	NA	NA	NA	NA	NA	NA
Ral	18	203	5.14.4	4	98	110	92.5	6.3	3.2	15.3	9.38	34.74	NA	NA	20.833333333333332	NA	NA	NA	NA	NA	NA	NA
Ral	18	209	5.15.4	4	99	112	80	6.9	3	15.8	8.51	32.73	NA	NA	20	NA	NA	NA	NA	NA	NA	NA
Ral	18	188	5.16.4	4	100	110	105	6.5	3.4	16.7	9.5	38.31	NA	NA	19.666666666666668	NA	NA	NA	NA	NA	NA	NA
Ral	18	161	5.17.4	4	101	115	85	6.3	3.2	15.1	8.57	30.61	NA	NA	21	NA	NA	NA	NA	NA	NA	NA
Ral	18	210	5.18.4	4	102	113	112.5	6.5	3.3	16.3	9.03	35.27	NA	NA	21	NA	NA	NA	NA	NA	NA	NA
Ral	18	191	5.19.4	4	103	110	100	6.2	3.1	14.4	8.54	28.18	NA	NA	20	NA	NA	NA	NA	NA	NA	NA
Ral	18	192	5.20.4	4	104	113	105	6.3	3.1	14.6	6.25	32.22	NA	NA	19.666666666666668	NA	NA	NA	NA	NA	NA	NA
Ral	18	94	10.20.4	6	1	116	112.5	6.7	3.1	15.2	8.7	31.99	NA	NA	19.666666666666668	NA	NA	NA	NA	NA	NA	NA
Ral	18	126	10.19.4	6	2	114	102.5	6.5	2.9	14.1	6.98	27.59	NA	NA	21.333333333333332	NA	NA	NA	NA	NA	NA	NA
Ral	18	86	10.18.4	6	3	114	112.5	6.7	3.2	16.1	9	35.86	NA	NA	20.5	NA	NA	NA	NA	NA	NA	NA
Ral	18	120	10.17.4	6	4	115	95	6.6	3	15	8.55	30.54	NA	NA	19	NA	NA	NA	NA	NA	NA	NA
Ral	18	106	10.16.4	6	5	113	117.5	6.1	2.9	13.3	9.41	27.51	NA	NA	18.666666666666668	NA	NA	NA	NA	NA	NA	NA
Ral	18	99	10.15.4	6	6	109	105	6.4	3.1	14.7	8.81	31.58	NA	NA	19.666666666666668	NA	NA	NA	NA	NA	NA	NA
Ral	18	82	10.14.4	6	7	112	100	6.6	3	15.1	7.88	28.45	NA	NA	20.833333333333332	NA	NA	NA	NA	NA	NA	NA
Ral	18	75	10.13.4	6	8	109	90	6.4	3	14.5	7.25	26.08	NA	NA	20.666666666666668	NA	NA	NA	NA	NA	NA	NA
Ral	18	112	10.12.4	6	9	113	115	6.3	3.1	14.3	8.29	30.37	NA	NA	22.166666666666668	NA	NA	NA	NA	NA	NA	NA
Ral	18	76	10.11.4	6	10	115	95	6.1	2.9	13.1	7.75	25.66	NA	NA	21.333333333333332	NA	NA	NA	NA	NA	NA	NA
Ral	18	111	10.10.4	6	11	114	112.5	6.1	3.1	13.9	8.39	29.65	NA	NA	23.166666666666668	NA	NA	NA	NA	NA	NA	NA
Ral	18	97	10.9.4	6	12	115	82.5	6.4	3	14.1	7.9	27.34	NA	NA	23	NA	NA	NA	NA	NA	NA	NA
Ral	18	107	10.8.4	6	13	116	110	6.7	3.2	15.9	9.09	35.93	NA	NA	21.333333333333332	NA	NA	NA	NA	NA	NA	NA
Ral	18	83	10.7.4	6	14	115	92.5	6.5	2.8	13.6	6.75	25.28	NA	NA	20.5	NA	NA	NA	NA	NA	NA	NA
Ral	18	132	10.6.4	6	15	109	112.5	6.3	3.3	15.8	7.2	36.36	NA	NA	20.166666666666668	NA	NA	NA	NA	NA	NA	NA
Ral	18	89	10.5.4	6	16	117	92.5	5.9	3	13.3	7.56	24.95	NA	NA	23.166666666666668	NA	NA	NA	NA	NA	NA	NA
Ral	18	92	10.4.4	6	17	112	97.5	6.1	3	14	7.76	27.52	NA	NA	21.5	NA	NA	NA	NA	NA	NA	NA
Ral	18	130	10.3.4	6	18	113	87.5	6.1	2.8	12.9	5.7	23.95	NA	NA	22.166666666666668	NA	NA	NA	NA	NA	NA	NA
Ral	18	90	10.2.4	6	19	113	85	6.5	3.2	15.8	8.52	32.9	NA	NA	20.666666666666668	NA	NA	NA	NA	NA	NA	NA
Ral	18	LA95135	10.1.4	6	20	115	100	6.5	3.1	14.9	7	30.43	NA	NA	20.5	NA	NA	NA	NA	NA	NA	NA
Ral	18	214	9.20.4	6	22	114	105	6.3	3.3	15.6	9.45	36.07	NA	NA	18.666666666666668	NA	NA	NA	NA	NA	NA	NA
Ral	18	160	9.19.4	6	23	111	80	6.3	3	13.7	8.23	27.99	NA	NA	20.333333333333332	NA	NA	NA	NA	NA	NA	NA
Ral	18	215	9.18.4	6	24	116	102.5	6.1	3.3	15.1	8.93	34.88	NA	NA	21.333333333333332	NA	NA	NA	NA	NA	NA	NA
Ral	18	171	9.17.4	6	25	113	80	6.5	3	14.7	6.63	26.1	NA	NA	21.833333333333332	NA	NA	NA	NA	NA	NA	NA
Ral	18	176	9.16.4	6	26	120	80	5.9	2.8	12.2	5.92	19.67	NA	NA	22.166666666666668	NA	NA	NA	NA	NA	NA	NA
Ral	18	148	9.15.4	6	27	112	77.5	6.4	2.9	13.7	8.61	26.66	NA	NA	21.166666666666668	NA	NA	NA	NA	NA	NA	NA
Ral	18	205	9.14.4	6	28	115	107.5	6.1	3.3	15	9.02	32.92	NA	NA	21.333333333333332	NA	NA	NA	NA	NA	NA	NA
Ral	18	185	9.13.4	6	29	112	80	6.6	3.3	16.4	8.82	36.45	NA	NA	19.166666666666668	NA	NA	NA	NA	NA	NA	NA
Ral	18	145	9.12.4	6	30	113	80	6.3	3.1	14.8	8.76	30.74	NA	NA	19.833333333333332	NA	NA	NA	NA	NA	NA	NA
Ral	18	200	9.11.4	6	31	115	80	6.3	2.9	13.9	8.42	27.16	NA	NA	19.666666666666668	NA	NA	NA	NA	NA	NA	NA
Ral	18	LA95135	9.10.4	6	32	112	92.5	6.7	3.2	16.1	8.64	34.56	NA	NA	18.5	NA	NA	NA	NA	NA	NA	NA
Ral	18	196	9.9.4	6	33	117	87.5	6	2.9	13.3	7.73	23.93	NA	NA	22.666666666666668	NA	NA	NA	NA	NA	NA	NA
Ral	18	202	9.8.4	6	34	117	95	6.6	3.2	16	8.47	34.02	NA	NA	21	NA	NA	NA	NA	NA	NA	NA
Ral	18	178	9.7.4	6	35	109	95	7	3.3	16.9	8.65	36.34	NA	NA	19	NA	NA	NA	NA	NA	NA	NA
Ral	18	201	9.6.4	6	36	112	65	6	2.8	12.8	7.93	23.39	NA	NA	20.666666666666668	NA	NA	NA	NA	NA	NA	NA
Ral	18	146	9.5.4	6	37	116	85	6.4	3	14.6	8.04	29.34	NA	NA	22	NA	NA	NA	NA	NA	NA	NA
Ral	18	181	9.4.4	6	38	113	90	6.3	3	14.4	8.56	28.44	NA	NA	20.666666666666668	NA	NA	NA	NA	NA	NA	NA
Ral	18	199	9.3.4	6	39	117	115	6.2	3	13.8	7.5	25.68	NA	NA	23.333333333333332	NA	NA	NA	NA	NA	NA	NA
Ral	18	180	9.2.4	6	40	112	97.5	6.2	3.2	15	9.8	34.39	NA	NA	17.5	NA	NA	NA	NA	NA	NA	NA
Ral	18	MPV57	9.1.4	6	41	113	92.5	6	3	13.4	9.31	26.6	NA	NA	20.333333333333332	NA	NA	NA	NA	NA	NA	NA
Ral	18	LA95135	8.20.4	6	43	114	107.5	6.5	3.1	14.9	7.65	30.12	NA	NA	19	NA	NA	NA	NA	NA	NA	NA
Ral	18	301	8.19.4	6	44	110	100	6.3	2.8	13.3	8.47	25.59	NA	NA	21.416666666666668	NA	NA	NA	NA	NA	NA	NA
Ral	18	323	8.18.4	6	45	114	87.5	5.6	2.8	11.9	6.76	21.26	NA	NA	22.333333333333332	NA	NA	NA	NA	NA	NA	NA
Ral	18	324	8.17.4	6	46	115	110	6.3	3.1	14.8	7.06	29.54	NA	NA	22.833333333333332	NA	NA	NA	NA	NA	NA	NA
Ral	18	303	8.16.4	6	47	118	102.5	6	3	13.5	6.41	25.85	NA	NA	22	NA	NA	NA	NA	NA	NA	NA
Ral	18	290	8.15.4	6	48	112	90	6.2	2.7	12.5	6.99	22.99	NA	NA	21.833333333333332	NA	NA	NA	NA	NA	NA	NA
Ral	18	320	8.14.4	6	49	113	105	6.4	3	14.3	7.26	29.16	NA	NA	20.5	NA	NA	NA	NA	NA	NA	NA
Ral	18	343	8.13.4	6	50	108	95	6.4	3.1	15.2	6.23	31.15	NA	NA	22.333333333333332	NA	NA	NA	NA	NA	NA	NA
Ral	18	307	8.12.4	6	51	109	80	6.6	3	14.6	7.77	29.88	NA	NA	20.6	NA	NA	NA	NA	NA	NA	NA
Ral	18	330	8.11.4	6	52	116	85	6.4	2.9	13.8	6.93	26.15	NA	NA	21.833333333333332	NA	NA	NA	NA	NA	NA	NA
Ral	18	318	8.10.4	6	53	109	105	6.4	3.2	15.2	8.91	34.14	NA	NA	20.333333333333332	NA	NA	NA	NA	NA	NA	NA
Ral	18	335	8.9.4	6	54	114	115	6.1	3.3	14.9	8.73	34.78	NA	NA	19.833333333333332	NA	NA	NA	NA	NA	NA	NA
Ral	18	329	8.8.4	6	55	114	115	6.3	3.1	14.7	8.45	32.13	NA	NA	19.5	NA	NA	NA	NA	NA	NA	NA
Ral	18	306	8.7.4	6	56	109	77.5	6.6	3.1	14.9	6.75	31.11	NA	NA	18.5	NA	NA	NA	NA	NA	NA	NA
Ral	18	316	8.6.4	6	57	110	105	6.2	3	13.8	8.62	26.44	NA	NA	25.2	NA	NA	NA	NA	NA	NA	NA
Ral	18	327	8.5.4	6	58	109	115	6.8	3.3	16.8	9.18	38.73	NA	NA	20.166666666666668	NA	NA	NA	NA	NA	NA	NA
Ral	18	322	8.4.4	6	59	112	100	6.5	3.2	15.3	7.88	33.11	NA	NA	19.666666666666668	NA	NA	NA	NA	NA	NA	NA
Ral	18	321	8.3.4	6	60	110	95	6.5	3.2	15.4	8.49	31.44	NA	NA	20.666666666666668	NA	NA	NA	NA	NA	NA	NA
Ral	18	295	8.2.4	6	61	110	77.5	6.4	2.8	13.4	7.29	26.13	NA	NA	20.166666666666668	NA	NA	NA	NA	NA	NA	NA
Ral	18	LA95135	8.1.4	6	62	114	97.5	6.6	3.1	15.4	8.36	33.04	NA	NA	18.666666666666668	NA	NA	NA	NA	NA	NA	NA
Ral	18	64	7.20.4	6	64	113	105.5	6.5	3.1	15	8.84	30.48	NA	NA	20.25	NA	NA	NA	NA	NA	NA	NA
Ral	18	66	7.19.4	6	65	110	90	6.2	3.2	15	8.71	34.16	NA	NA	20.666666666666668	NA	NA	NA	NA	NA	NA	NA
Ral	18	45	7.18.4	6	66	118	82.5	6.2	2.8	12.7	7.92	22.76	NA	NA	20.833333333333332	NA	NA	NA	NA	NA	NA	NA
Ral	18	67	7.17.4	6	67	110	97.5	6.7	3.1	15.7	9.51	33.49	NA	NA	17.333333333333332	NA	NA	NA	NA	NA	NA	NA
Ral	18	30	7.16.4	6	68	109	82.5	6.8	3	14.9	8.66	30.49	NA	NA	18	NA	NA	NA	NA	NA	NA	NA
Ral	18	39	7.15.4	6	69	119	87.5	6.6	2.9	14.5	8.13	29.14	NA	NA	20	NA	NA	NA	NA	NA	NA	NA
Ral	18	50	7.14.4	6	70	110	85	6.8	3.1	15.8	8.08	31.56	NA	NA	20.5	NA	NA	NA	NA	NA	NA	NA
Ral	18	55	7.13.4	6	71	107	92.5	6.1	3.1	14.2	9.39	31.4	NA	NA	20.5	NA	NA	NA	NA	NA	NA	NA
Ral	18	20	7.12.4	6	72	114	90	6.1	3.1	14.2	7.45	27.19	NA	NA	22.333333333333332	NA	NA	NA	NA	NA	NA	NA
Ral	18	53	7.11.4	6	73	108	100	6.3	3.2	15.5	9.12	34.81	NA	NA	19.833333333333332	NA	NA	NA	NA	NA	NA	NA
Ral	18	59	7.10.4	6	74	113	105	6.6	3.2	15.5	10.13	34.46	NA	NA	21.8	NA	NA	NA	NA	NA	NA	NA
Ral	18	43	7.9.4	6	75	109	87.5	6.3	3.1	15	8.7	31.29	NA	NA	22.166666666666668	NA	NA	NA	NA	NA	NA	NA
Ral	18	42	7.8.4	6	76	118	62.5	6.2	2.7	12.5	8.1	22.01	NA	NA	18.833333333333332	NA	NA	NA	NA	NA	NA	NA
Ral	18	41	7.7.4	6	77	115	85	6	3	13.7	8.11	27.21	NA	NA	22	NA	NA	NA	NA	NA	NA	NA
Ral	18	22	7.6.4	6	78	108	85	6.3	3.1	14.8	9.18	30.5	NA	NA	20	NA	NA	NA	NA	NA	NA	NA
Ral	18	60	7.5.4	6	79	109	90	6.5	3.3	16	8.83	33.45	NA	NA	21.166666666666668	NA	NA	NA	NA	NA	NA	NA
Ral	18	58	7.4.4	6	80	108	100	7	3.3	17.3	9.12	37.53	NA	NA	19	NA	NA	NA	NA	NA	NA	NA
Ral	18	54	7.3.4	6	81	113	92.5	6.9	3	16	8.6	33.2	NA	NA	19.166666666666668	NA	NA	NA	NA	NA	NA	NA
Ral	18	7	7.2.4	6	82	108	80	6.8	3	15.4	8.13	31.39	NA	NA	20.5	NA	NA	NA	NA	NA	NA	NA
Ral	18	LA95135	7.1.4	6	83	110	100	6.7	3.2	15.8	8.79	34.61	NA	NA	17.5	NA	NA	NA	NA	NA	NA	NA
Ral	18	271	6.20.4	6	85	114	95	6.6	2.9	14.4	6.99	27.63	NA	NA	20.666666666666668	NA	NA	NA	NA	NA	NA	NA
Ral	18	244	6.19.4	6	86	110	85	6.6	3	15.1	7.85	30.91	NA	NA	19.833333333333332	NA	NA	NA	NA	NA	NA	NA
Ral	18	252	6.18.4	6	87	113	75	6.1	3.1	14.4	6.27	26.57	NA	NA	22.25	NA	NA	NA	NA	NA	NA	NA
Ral	18	273	6.17.4	6	88	110	100	6.9	3.3	16.9	7.22	36.1	NA	NA	19.166666666666668	NA	NA	NA	NA	NA	NA	NA
Ral	18	274	6.16.4	6	89	110	105	6.4	3.2	15.3	9.58	33.5	NA	NA	19.333333333333332	NA	NA	NA	NA	NA	NA	NA
Ral	18	266	6.15.4	6	90	113	75	6.6	3	15.2	6.72	29.6	NA	NA	19.666666666666668	NA	NA	NA	NA	NA	NA	NA
Ral	18	230	6.14.4	6	91	113	75	6.2	2.9	13.2	6.27	23.93	NA	NA	20.666666666666668	NA	NA	NA	NA	NA	NA	NA
Ral	18	221	6.13.4	6	92	115	75	5.4	2.8	11.3	5.82	19.02	NA	NA	21.333333333333332	NA	NA	NA	NA	NA	NA	NA
Ral	18	270	6.12.4	6	93	108	90	6.8	3.1	15.6	6.73	31.75	NA	NA	21.666666666666668	NA	NA	NA	NA	NA	NA	NA
Ral	18	217	6.11.4	6	94	109	110	6.8	3.2	16	6.35	35.08	NA	NA	18.666666666666668	NA	NA	NA	NA	NA	NA	NA
Ral	18	261	6.10.4	6	95	108	105	6	3.3	15	8.39	34.39	NA	NA	19.166666666666668	NA	NA	NA	NA	NA	NA	NA
Ral	18	284	6.9.4	6	96	108	90	6.5	3.3	16.1	8.22	35.43	NA	NA	19.166666666666668	NA	NA	NA	NA	NA	NA	NA
Ral	18	264	6.8.4	6	97	110	80	6.4	3.1	15.2	7.93	30.86	NA	NA	19.166666666666668	NA	NA	NA	NA	NA	NA	NA
Ral	18	257	6.7.4	6	98	107	90	6.7	3.2	16.2	8.06	34.15	NA	NA	18.166666666666668	NA	NA	NA	NA	NA	NA	NA
Ral	18	267	6.6.4	6	99	117	72.5	6.7	3	15.2	6.35	28.73	NA	NA	21.166666666666668	NA	NA	NA	NA	NA	NA	NA
Ral	18	227	6.5.4	6	100	115	95	6.6	3.1	15.3	7.11	28.44	NA	NA	17.5	NA	NA	NA	NA	NA	NA	NA
Ral	18	277	6.4.4	6	101	116	85	6.6	3.2	16	6.85	32.31	NA	NA	19.666666666666668	NA	NA	NA	NA	NA	NA	NA
Ral	18	245	6.3.4	6	102	113	97.5	6	3.1	13.7	8.12	27.07	NA	NA	18.833333333333332	NA	NA	NA	NA	NA	NA	NA
Ral	18	275	6.2.4	6	103	113	105	6.5	3.2	15.4	7.61	33.67	NA	NA	19.666666666666668	NA	NA	NA	NA	NA	NA	NA
Ral	18	LA95135	6.1.4	6	104	115	102.5	6.6	3.3	16.2	6.86	35.54	NA	NA	18.5	NA	NA	NA	NA	NA	NA	NA
Ral	18	102	10.20.3	7	1	114	122.5	6.2	2.9	13.7	6.6	26.51	NA	NA	21.666666666666668	NA	NA	NA	NA	NA	NA	NA
Ral	18	121	10.19.3	7	2	112	80	5.9	2.9	13.3	7.13	23.22	NA	NA	20.166666666666668	NA	NA	NA	NA	NA	NA	NA
Ral	18	131	10.18.3	7	3	116	120	6.5	3.4	16.4	8.71	38.03	NA	NA	19.166666666666668	NA	NA	NA	NA	NA	NA	NA
Ral	18	143	10.17.3	7	4	114	92.5	6.2	3	13.8	7.66	26.14	NA	NA	20.166666666666668	NA	NA	NA	NA	NA	NA	NA
Ral	18	88	10.16.3	7	5	113	87.5	6.2	3	13.6	7.42	24.57	NA	NA	18.666666666666668	NA	NA	NA	NA	NA	NA	NA
Ral	18	133	10.15.3	7	6	113	105	6.2	3	14.3	8.14	26.86	NA	NA	22.166666666666668	NA	NA	NA	NA	NA	NA	NA
Ral	18	LA95135	10.13.3	7	8	109	105	6.7	3.1	15.8	7.94	33.36	NA	NA	17.666666666666668	NA	NA	NA	NA	NA	NA	NA
Ral	18	98	10.12.3	7	9	109	95	6.5	3.3	15.8	7.86	32.61	NA	NA	19.5	NA	NA	NA	NA	NA	NA	NA
Ral	18	87	10.11.3	7	10	110	80	6.4	2.8	13.3	6.61	23.36	NA	NA	21.166666666666668	NA	NA	NA	NA	NA	NA	NA
Ral	18	85	10.10.3	7	11	114	125	6.3	3.3	15.4	8.85	34.44	NA	NA	19.833333333333332	NA	NA	NA	NA	NA	NA	NA
Ral	18	123	10.9.3	7	12	115	80	5.8	3	13.2	7.67	26	NA	NA	22	NA	NA	NA	NA	NA	NA	NA
Ral	18	74	10.8.3	7	13	112	105	6.4	3	14.7	7.83	28.47	NA	NA	22.333333333333332	NA	NA	NA	NA	NA	NA	NA
Ral	18	117	10.7.3	7	14	108	85	6.3	2.9	13.8	8.72	26.91	NA	NA	20	NA	NA	NA	NA	NA	NA	NA
Ral	18	104	10.6.3	7	15	109	100	6.5	3	14.6	8.14	29.93	NA	NA	19.166666666666668	NA	NA	NA	NA	NA	NA	NA
Ral	18	LA95135	10.5.3	7	16	113	95	6.1	3.1	14.1	9	28.39	NA	NA	21.666666666666668	NA	NA	NA	NA	NA	NA	NA
Ral	18	116	10.4.3	7	17	112	85	6.4	3	14.2	8.58	28.5	NA	NA	19.333333333333332	NA	NA	NA	NA	NA	NA	NA
Ral	18	77	10.3.3	7	18	108	95	5.9	3.1	13.7	8.47	27.41	NA	NA	20.666666666666668	NA	NA	NA	NA	NA	NA	NA
Ral	18	124	10.2.3	7	19	112	100	6.1	2.9	13.1	8.03	25.57	NA	NA	22.833333333333332	NA	NA	NA	NA	NA	NA	NA
Ral	18	MPV57	10.1.3	7	20	114	95	6.2	3.1	14.2	8.89	28.49	NA	NA	22.2	NA	NA	NA	NA	NA	NA	NA
Ral	18	164	9.20.3	7	22	115	102.5	6.3	3.3	15.6	9.08	35.06	NA	NA	19.666666666666668	NA	NA	NA	NA	NA	NA	NA
Ral	18	190	9.19.3	7	23	112	90	6	3	13.4	8.33	27.49	NA	NA	21.666666666666668	NA	NA	NA	NA	NA	NA	NA
Ral	18	152	9.18.3	7	24	113	75	6.7	3	14.8	7.54	29.45	NA	NA	18.833333333333332	NA	NA	NA	NA	NA	NA	NA
Ral	18	153	9.17.3	7	25	113	105	6.4	3.2	15.4	8.57	33.48	NA	NA	20.666666666666668	NA	NA	NA	NA	NA	NA	NA
Ral	18	157	9.16.3	7	26	113	107.5	6.5	3.1	15.1	8.58	31.09	NA	NA	22	NA	NA	NA	NA	NA	NA	NA
Ral	18	207	9.15.3	7	27	113	67.5	6.3	3	13.8	7.77	25.64	NA	NA	18.833333333333332	NA	NA	NA	NA	NA	NA	NA
Ral	18	170	9.14.3	7	28	108	100	6.7	3.3	16.2	8.99	35.12	NA	NA	20.5	NA	NA	NA	NA	NA	NA	NA
Ral	18	161	9.13.3	7	29	115	77.5	6.4	3.2	15.2	8.18	30.98	NA	NA	21.166666666666668	NA	NA	NA	NA	NA	NA	NA
Ral	18	208	9.12.3	7	30	117	110	6.4	3.3	16.2	8.73	36.07	NA	NA	20.833333333333332	NA	NA	NA	NA	NA	NA	NA
Ral	18	169	9.11.3	7	31	117	80	6.5	3	14.9	8.37	29.27	NA	NA	20.5	NA	NA	NA	NA	NA	NA	NA
Ral	18	175	9.10.3	7	32	112	90	6.5	3.1	15	8.4	28.38	NA	NA	20.333333333333332	NA	NA	NA	NA	NA	NA	NA
Ral	18	149	9.9.3	7	33	117	92.5	6.1	3	13.9	7.52	25.32	NA	NA	22.166666666666668	NA	NA	NA	NA	NA	NA	NA
Ral	18	174	9.8.3	7	34	110	70	6.3	2.7	12.4	8.23	22.67	NA	NA	17	NA	NA	NA	NA	NA	NA	NA
Ral	18	192	9.7.3	7	35	114	102.5	6.4	3.2	15.3	9.01	33.49	NA	NA	20.833333333333332	NA	NA	NA	NA	NA	NA	NA
Ral	18	163	9.6.3	7	36	119	77.5	6.3	3	14.4	8.04	27.53	NA	NA	21.5	NA	NA	NA	NA	NA	NA	NA
Ral	18	191	9.5.3	7	37	110	95	6.1	3	13.5	8.35	26.18	NA	NA	23	NA	NA	NA	NA	NA	NA	NA
Ral	18	168	9.4.3	7	38	110	95	6.4	3.1	14.8	9.4	33.1	NA	NA	17	NA	NA	NA	NA	NA	NA	NA
Ral	18	167	9.3.3	7	39	110	82.5	6.6	3	14.9	7.3	26.26	NA	NA	19.25	NA	NA	NA	NA	NA	NA	NA
Ral	18	166	9.2.3	7	40	113	107.5	6.6	3.2	15.5	9.06	33.43	NA	NA	19.166666666666668	NA	NA	NA	NA	NA	NA	NA
Ral	18	LA95135	9.1.3	7	41	112	100	6.5	3	14.5	8.47	29.41	NA	NA	16.666666666666668	NA	NA	NA	NA	NA	NA	NA
Ral	18	311	8.20.3	7	43	118	90	6	2.6	11.8	5.61	18.1	NA	NA	22	NA	NA	NA	NA	NA	NA	NA
Ral	18	337	8.19.3	7	44	109	100	6.3	3	13.8	8.13	28.53	NA	NA	19.5	NA	NA	NA	NA	NA	NA	NA
Ral	18	LA95135	8.18.3	7	45	114	102.5	6.5	2.9	14.2	7.26	29.16	NA	NA	18.333333333333332	NA	NA	NA	NA	NA	NA	NA
Ral	18	298	8.17.3	7	46	118	115	6.3	3	14.1	6.37	28.69	NA	NA	22.666666666666668	NA	NA	NA	NA	NA	NA	NA
Ral	18	352	8.16.3	7	47	117	75	5.7	2.8	12.2	5.62	19.31	NA	NA	20.5	NA	NA	NA	NA	NA	NA	NA
Ral	18	331	8.15.3	7	48	113	92.5	6.3	2.8	13.1	7.69	24.97	NA	NA	20.166666666666668	NA	NA	NA	NA	NA	NA	NA
Ral	18	356	8.14.3	7	49	109	105	6.8	2.8	14	6.63	27.74	NA	NA	20.5	NA	NA	NA	NA	NA	NA	NA
Ral	18	289	8.13.3	7	50	107	80	6.5	2.9	14.2	6.28	26.61	NA	NA	19.666666666666668	NA	NA	NA	NA	NA	NA	NA
Ral	18	340	8.12.3	7	51	109	85	6.3	2.9	13.7	6.59	25.25	NA	NA	19.5	NA	NA	NA	NA	NA	NA	NA
Ral	18	332	8.11.3	7	52	108	75	6.2	2.9	13.4	6.19	24.09	NA	NA	19.666666666666668	NA	NA	NA	NA	NA	NA	NA
Ral	18	353	8.10.3	7	53	107	102.5	6.3	3.1	14.6	7.92	31.68	NA	NA	19.166666666666668	NA	NA	NA	NA	NA	NA	NA
Ral	18	LA95135	8.9.3	7	54	112	100	6.6	3	14.6	8.13	29.78	NA	NA	17.5	NA	NA	NA	NA	NA	NA	NA
Ral	18	326	8.8.3	7	55	114	127.5	6.5	3.1	15	7.73	33.32	NA	NA	20.833333333333332	NA	NA	NA	NA	NA	NA	NA
Ral	18	349	8.7.3	7	56	111	97.5	6.3	3.2	15	8.15	32.86	NA	NA	19.666666666666668	NA	NA	NA	NA	NA	NA	NA
Ral	18	342	8.6.3	7	57	116	85	6.3	3.1	14.9	6.8	28.22	NA	NA	24.666666666666668	NA	NA	NA	NA	NA	NA	NA
Ral	18	334	8.5.3	7	58	110	77.5	6.3	3	14	7.79	27.53	NA	NA	20	NA	NA	NA	NA	NA	NA	NA
Ral	18	MPV57	8.4.3	7	59	113	95	6.2	3	14	9.02	28.45	NA	NA	21	NA	NA	NA	NA	NA	NA	NA
Ral	18	346	8.3.3	7	60	113	95	6	3	13.5	7.24	27.01	NA	NA	22.166666666666668	NA	NA	NA	NA	NA	NA	NA
Ral	18	339	8.2.3	7	61	114	92.5	6.5	3.2	15.4	7.5	32.47	NA	NA	20.666666666666668	NA	NA	NA	NA	NA	NA	NA
Ral	18	MPV57	8.1.3	7	62	113	95	6.1	3	13.8	8.29	27.82	NA	NA	21	NA	NA	NA	NA	NA	NA	NA
Ral	18	69	7.20.3	7	64	118	115	6.3	3.1	14.5	9.01	31.61	NA	NA	21	NA	NA	NA	NA	NA	NA	NA
Ral	18	49	7.19.3	7	65	113	105	6.8	3.2	16.2	9.75	36.11	NA	NA	18.666666666666668	NA	NA	NA	NA	NA	NA	NA
Ral	18	71	7.18.3	7	66	112	90	6.3	3.2	15	8.49	30.43	NA	NA	22.916666666666668	NA	NA	NA	NA	NA	NA	NA
Ral	18	16	7.17.3	7	67	110	100	6.6	3.2	15.9	9.41	36.47	NA	NA	17.166666666666668	NA	NA	NA	NA	NA	NA	NA
Ral	18	57	7.16.3	7	68	108	92.5	6.6	3	14.8	9.25	31.68	NA	NA	19	NA	NA	NA	NA	NA	NA	NA
Ral	18	33	7.15.3	7	69	108	97.5	6.6	3.1	15.5	9.14	34.23	NA	NA	19.333333333333332	NA	NA	NA	NA	NA	NA	NA
Ral	18	40	7.14.3	7	70	110	92.5	6.3	3.2	15.2	8.59	30.79	NA	NA	19.833333333333332	NA	NA	NA	NA	NA	NA	NA
Ral	18	MPV57	7.13.3	7	71	112	95	6.2	3	13.8	8.72	28.13	NA	NA	21.333333333333332	NA	NA	NA	NA	NA	NA	NA
Ral	18	36	7.12.3	7	72	109	100	6.6	3	14.3	8.71	28.28	NA	NA	18.5	NA	NA	NA	NA	NA	NA	NA
Ral	18	38	7.11.3	7	73	107	105	6.6	3.4	16.7	9.58	40.42	NA	NA	17	NA	NA	NA	NA	NA	NA	NA
Ral	18	28	7.10.3	7	74	114	105	6.4	3	14.2	9.22	30.53	NA	NA	19.666666666666668	NA	NA	NA	NA	NA	NA	NA
Ral	18	3	7.9.3	7	75	120	85	6.5	2.8	13.5	7.2	25	NA	NA	21.833333333333332	NA	NA	NA	NA	NA	NA	NA
Ral	18	19	7.8.3	7	76	109	82.5	6.4	3	14.5	8.23	28.78	NA	NA	21.333333333333332	NA	NA	NA	NA	NA	NA	NA
Ral	18	LA95135	7.7.3	7	77	112	100	6.6	3.2	15.8	7.63	34.52	NA	NA	18.666666666666668	NA	NA	NA	NA	NA	NA	NA
Ral	18	51	7.6.3	7	78	108	100	6.7	3.3	16.6	9.54	39.92	NA	NA	17.5	NA	NA	NA	NA	NA	NA	NA
Ral	18	63	7.5.3	7	79	108	92.5	6.4	3.1	14.9	9.07	32.16	NA	NA	18.5	NA	NA	NA	NA	NA	NA	NA
Ral	18	8	7.4.3	7	80	109	100	6.3	3.1	14.5	8.75	27.78	NA	NA	21	NA	NA	NA	NA	NA	NA	NA
Ral	18	56	7.3.3	7	81	108	100	6.6	3.1	15.3	9.68	35.72	NA	NA	17.833333333333332	NA	NA	NA	NA	NA	NA	NA
Ral	18	68	7.2.3	7	82	109	80	6.6	3.2	15.8	7.94	32.02	NA	NA	22.5	NA	NA	NA	NA	NA	NA	NA
Ral	18	MPV57	7.1.3	7	83	110	95	6.1	3	13.6	9.01	27.39	NA	NA	19.166666666666668	NA	NA	NA	NA	NA	NA	NA
Ral	18	225	6.20.3	7	85	109	85	6.4	3	14.3	7.24	29.92	NA	NA	19.333333333333332	NA	NA	NA	NA	NA	NA	NA
Ral	18	286	6.19.3	7	86	107	95	6.3	3	14.3	8.11	31.8	NA	NA	17.333333333333332	NA	NA	NA	NA	NA	NA	NA
Ral	18	287	6.18.3	7	87	107	92.5	6.3	3.2	15	7.5	31.38	NA	NA	18.5	NA	NA	NA	NA	NA	NA	NA
Ral	18	220	6.17.3	7	88	113	95	6.8	3	15.3	7.22	31.39	NA	NA	20	NA	NA	NA	NA	NA	NA	NA
Ral	18	234	6.16.3	7	89	119	95	6.2	2.9	13.4	7.62	26.01	NA	NA	22.833333333333332	NA	NA	NA	NA	NA	NA	NA
Ral	18	246	6.15.3	7	90	109	100	6	3.2	14.3	8.49	30.21	NA	NA	22.333333333333332	NA	NA	NA	NA	NA	NA	NA
Ral	18	228	6.14.3	7	91	109	95	6.3	3.3	15.8	8.23	35.47	NA	NA	18.833333333333332	NA	NA	NA	NA	NA	NA	NA
Ral	18	285	6.13.3	7	92	110	95	6.3	3.1	14.8	7.1	31.7	NA	NA	20.666666666666668	NA	NA	NA	NA	NA	NA	NA
Ral	18	247	6.12.3	7	93	105	92.5	6.1	3.1	14.4	8.38	32.99	NA	NA	17.5	NA	NA	NA	NA	NA	NA	NA
Ral	18	276	6.11.3	7	94	112	92.5	6	3.2	14.3	8.67	32.84	NA	NA	18.5	NA	NA	NA	NA	NA	NA	NA
Ral	18	263	6.10.3	7	95	113	100	6.3	3.1	14.8	7.34	30.84	NA	NA	20.666666666666668	NA	NA	NA	NA	NA	NA	NA
Ral	18	MPV57	6.9.3	7	96	114	87.5	6.2	3.1	14.2	7.39	29.56	NA	NA	19.666666666666668	NA	NA	NA	NA	NA	NA	NA
Ral	18	282	6.8.3	7	97	106	92.5	7.1	3.3	17.7	7.42	40.11	NA	NA	16	NA	NA	NA	NA	NA	NA	NA
Ral	18	224	6.7.3	7	98	111	82.5	5.7	3.1	12.8	8.41	25.8	NA	NA	21.166666666666668	NA	NA	NA	NA	NA	NA	NA
Ral	18	279	6.6.3	7	99	107	97.5	6.4	3.2	15.2	7.73	33.76	NA	NA	16.333333333333332	NA	NA	NA	NA	NA	NA	NA
Ral	18	265	6.5.3	7	100	109	82.5	6.8	3	15.1	7.3	31.6	NA	NA	18.5	NA	NA	NA	NA	NA	NA	NA
Ral	18	255	6.4.3	7	101	112	85	6.4	3.1	14.8	8	31.01	NA	NA	18.333333333333332	NA	NA	NA	NA	NA	NA	NA
Ral	18	259	6.3.3	7	102	113	90	6.4	3	14.6	6.84	29.74	NA	NA	19	NA	NA	NA	NA	NA	NA	NA
Ral	18	250	6.2.3	7	103	113	112.5	6.2	3.1	14.2	7.52	30.08	NA	NA	20.833333333333332	NA	NA	NA	NA	NA	NA	NA
Ral	18	MPV57	6.1.3	7	104	110	95	6.2	3.1	14.3	8.03	29.96	NA	NA	19.5	NA	NA	NA	NA	NA	NA	NA
Ral	18	136	10.20.2	8	1	110	110	6.7	3.1	15.1	8.25	29.78	NA	NA	21.833333333333332	NA	NA	NA	NA	NA	NA	NA
Ral	18	95	10.19.2	8	2	117	92.5	6.2	3	14.2	7.01	27.71	NA	NA	23	NA	NA	NA	NA	NA	NA	NA
Ral	18	119	10.18.2	8	3	119	105	6.5	3.1	14.9	8.76	32.32	NA	NA	19.666666666666668	NA	NA	NA	NA	NA	NA	NA
Ral	18	101	10.17.2	8	4	108	90	6.6	3.2	15.6	7.81	33.38	NA	NA	17.666666666666668	NA	NA	NA	NA	NA	NA	NA
Ral	18	138	10.16.2	8	5	110	85	6	2.9	13.1	7.29	24.46	NA	NA	21.333333333333332	NA	NA	NA	NA	NA	NA	NA
Ral	18	81	10.15.2	8	6	113	92.5	6.1	3.1	14.2	7.65	27.92	NA	NA	21.166666666666668	NA	NA	NA	NA	NA	NA	NA
Ral	18	91	10.14.2	8	7	108	87.5	6.6	3.2	16	8.1	31.03	NA	NA	20.333333333333332	NA	NA	NA	NA	NA	NA	NA
Ral	18	140	10.13.2	8	8	109	107.5	6.7	3.1	15.8	8.8	35.63	NA	NA	19.833333333333332	NA	NA	NA	NA	NA	NA	NA
Ral	18	LA95135	10.12.2	8	9	110	105	6.7	3.2	16	8.33	35	NA	NA	18.833333333333332	NA	NA	NA	NA	NA	NA	NA
Ral	18	84	10.11.2	8	10	108	105	6.3	3.4	16	9.62	38.48	NA	NA	19	NA	NA	NA	NA	NA	NA	NA
Ral	18	96	10.10.2	8	11	115	120	6.1	3.1	14.1	8.45	30.62	NA	NA	21.166666666666668	NA	NA	NA	NA	NA	NA	NA
Ral	18	80	10.9.2	8	12	109	87.5	6.7	3	14.6	7.5	27.47	NA	NA	20	NA	NA	NA	NA	NA	NA	NA
Ral	18	93	10.8.2	8	13	108	112.5	6.9	3.4	17.5	9.16	42.41	NA	NA	16.5	NA	NA	NA	NA	NA	NA	NA
Ral	18	100	10.7.2	8	14	109	80	6.4	3	14.7	8.09	31.12	NA	NA	19.166666666666668	NA	NA	NA	NA	NA	NA	NA
Ral	18	73	10.6.2	8	15	109	97.5	6.2	3	14.1	8.43	27.28	NA	NA	20.5	NA	NA	NA	NA	NA	NA	NA
Ral	18	109	10.5.2	8	16	109	85	6.4	3.1	14.8	8.02	31.57	NA	NA	19.166666666666668	NA	NA	NA	NA	NA	NA	NA
Ral	18	78	10.4.2	8	17	114	115	6.7	3.3	16.5	8.66	36.39	NA	NA	20.333333333333332	NA	NA	NA	NA	NA	NA	NA
Ral	18	127	10.3.2	8	18	118	82.5	6.1	3.2	14.5	6.86	26.8	NA	NA	22.333333333333332	NA	NA	NA	NA	NA	NA	NA
Ral	18	115	10.2.2	8	19	108	100	6.7	3.3	16.3	9.01	37.08	NA	NA	19	NA	NA	NA	NA	NA	NA	NA
Ral	18	212	9.20.2	8	22	107	90	6.3	3.1	14.6	7.62	31.23	NA	NA	18.333333333333332	NA	NA	NA	NA	NA	NA	NA
Ral	18	156	9.19.2	8	23	110	105	6.3	3.2	14.7	9.82	34.58	NA	NA	20.333333333333332	NA	NA	NA	NA	NA	NA	NA
Ral	18	210	9.18.2	8	24	115	110	6.3	3.2	15.3	7.97	33.21	NA	NA	21.333333333333332	NA	NA	NA	NA	NA	NA	NA
Ral	18	209	9.17.2	8	25	113	75	6.8	3	15.6	8.09	31.48	NA	NA	20	NA	NA	NA	NA	NA	NA	NA
Ral	18	LA95135	9.16.2	8	26	114	97.5	6.6	3.2	16	7.72	33.71	NA	NA	19	NA	NA	NA	NA	NA	NA	NA
Ral	18	158	9.15.2	8	27	113	85	6.7	3.2	15.9	8.3	33.88	NA	NA	20.666666666666668	NA	NA	NA	NA	NA	NA	NA
Ral	18	159	9.13.2	8	29	114	80	6.6	3.1	15.2	7.28	29.35	NA	NA	21.333333333333332	NA	NA	NA	NA	NA	NA	NA
Ral	18	172	9.12.2	8	30	114	105	6.5	3.3	15.9	8.51	35.46	NA	NA	19.333333333333332	NA	NA	NA	NA	NA	NA	NA
Ral	18	150	9.11.2	8	31	114	72.5	6.2	2.7	12.4	7.99	22.19	NA	NA	20	NA	NA	NA	NA	NA	NA	NA
Ral	18	197	9.10.2	8	32	115	107.5	6.9	3.2	16.6	8.75	36.46	NA	NA	17.333333333333332	NA	NA	NA	NA	NA	NA	NA
Ral	18	155	9.9.2	8	33	112	90	6	3	13.4	8.44	25.81	NA	NA	22.833333333333332	NA	NA	NA	NA	NA	NA	NA
Ral	18	147	9.8.2	8	34	118	97.5	6.4	3	14.4	8.21	30.41	NA	NA	18.5	NA	NA	NA	NA	NA	NA	NA
Ral	18	173	9.7.2	8	35	117	107.5	6.1	3.2	14.7	9.25	32.01	NA	NA	20.333333333333332	NA	NA	NA	NA	NA	NA	NA
Ral	18	MPV57	9.6.2	8	36	114	90	6.2	3	13.9	9.3	28.44	NA	NA	20.5	NA	NA	NA	NA	NA	NA	NA
Ral	18	198	9.5.2	8	37	112	80	6.7	2.8	13.9	7.32	26.52	NA	NA	22.166666666666668	NA	NA	NA	NA	NA	NA	NA
Ral	18	154	9.4.2	8	38	112	107.5	6.8	3.3	16.4	9.37	36.6	NA	NA	18.916666666666668	NA	NA	NA	NA	NA	NA	NA
Ral	18	189	9.3.2	8	39	117	77.5	5.7	2.6	11.3	6.85	17.98	NA	NA	19.5	NA	NA	NA	NA	NA	NA	NA
Ral	18	187	9.2.2	8	40	110	105	6.2	2.9	13.3	8.92	27.96	NA	NA	22.166666666666668	NA	NA	NA	NA	NA	NA	NA
Ral	18	MPV57	9.1.2	8	41	113	92.5	6	2.9	13.2	8.3	25.08	NA	NA	16.666666666666668	NA	NA	NA	NA	NA	NA	NA
Ral	18	MPV57	8.20.2	8	43	114	97.5	6.1	3	13.6	8.01	27.15	NA	NA	21.666666666666668	NA	NA	NA	NA	NA	NA	NA
Ral	18	333	8.19.2	8	44	116	87.5	5.6	2.7	11.2	6.81	19.8	NA	NA	21	NA	NA	NA	NA	NA	NA	NA
Ral	18	312	8.18.2	8	45	110	80	6.3	2.8	13	6.93	24.23	NA	NA	20.833333333333332	NA	NA	NA	NA	NA	NA	NA
Ral	18	357	8.17.2	8	46	109	97.5	6.7	3.3	16.3	7.05	33.89	NA	NA	20.166666666666668	NA	NA	NA	NA	NA	NA	NA
Ral	18	309	8.16.2	8	47	117	115	6.2	3	14.2	8.99	30.79	NA	NA	19.916666666666668	NA	NA	NA	NA	NA	NA	NA
Ral	18	308	8.15.2	8	48	112	92.5	5.7	2.7	11.5	6.76	21.88	NA	NA	19.333333333333332	NA	NA	NA	NA	NA	NA	NA
Ral	18	300	8.14.2	8	49	108	115	6.7	3.2	16	7.99	34.89	NA	NA	18.833333333333332	NA	NA	NA	NA	NA	NA	NA
Ral	18	338	8.13.2	8	50	113	115	6.3	3.2	15.1	7.38	31.54	NA	NA	21.4	NA	NA	NA	NA	NA	NA	NA
Ral	18	355	8.12.2	8	51	108	80	6.7	3	15.1	7.1	28.86	NA	NA	18	NA	NA	NA	NA	NA	NA	NA
Ral	18	302	8.11.2	8	52	115	102.5	6.5	3.2	15.5	6.93	32.38	NA	NA	20.166666666666668	NA	NA	NA	NA	NA	NA	NA
Ral	18	297	8.10.2	8	53	113	90	6.6	2.8	13.9	6.28	25.22	NA	NA	20.083333333333332	NA	NA	NA	NA	NA	NA	NA
Ral	18	351	8.9.2	8	54	115	112.5	6.8	3.2	16	8.21	36.33	NA	NA	20.166666666666668	NA	NA	NA	NA	NA	NA	NA
Ral	18	299	8.8.2	8	55	109	87.5	6.2	2.9	13.2	6.96	24.51	NA	NA	19.333333333333332	NA	NA	NA	NA	NA	NA	NA
Ral	18	314	8.7.2	8	56	115	102.5	6.3	3	14.5	7.04	30.88	NA	NA	19.833333333333332	NA	NA	NA	NA	NA	NA	NA
Ral	18	348	8.6.2	8	57	108	75	6.6	3	14.6	7.27	29.2	NA	NA	19.333333333333332	NA	NA	NA	NA	NA	NA	NA
Ral	18	341	8.5.2	8	58	115	105	6.3	3	14.4	6.7	29.26	NA	NA	21.333333333333332	NA	NA	NA	NA	NA	NA	NA
Ral	18	319	8.4.2	8	59	108	77.5	6.4	3.1	14.5	7.02	29.13	NA	NA	20.833333333333332	NA	NA	NA	NA	NA	NA	NA
Ral	18	293	8.3.2	8	60	110	85	6.3	2.9	13.6	7.07	25.9	NA	NA	19.833333333333332	NA	NA	NA	NA	NA	NA	NA
Ral	18	315	8.2.2	8	61	117	77.5	6.5	2.8	13.8	6.04	25.92	NA	NA	21.5	NA	NA	NA	NA	NA	NA	NA
Ral	18	LA95135	8.1.2	8	62	114	100	6.5	3.1	15	8.55	31.67	NA	NA	19.333333333333332	NA	NA	NA	NA	NA	NA	NA
Ral	18	70	7.20.2	8	64	114	82.5	6.2	3.1	14.7	8.1	28.62	NA	NA	22.5	NA	NA	NA	NA	NA	NA	NA
Ral	18	29	7.19.2	8	65	119	80	6.1	2.9	13.1	8.2	25.23	NA	NA	20.333333333333332	NA	NA	NA	NA	NA	NA	NA
Ral	18	44	7.18.2	8	66	112	95	6.2	3.2	14.8	8.37	31.35	NA	NA	19.5	NA	NA	NA	NA	NA	NA	NA
Ral	18	61	7.17.2	8	67	117	85	5.8	2.9	12.8	8.31	22.52	NA	NA	21.333333333333332	NA	NA	NA	NA	NA	NA	NA
Ral	18	LA95135	7.16.2	8	68	112	100	6.6	3.1	15.5	9.11	33.25	NA	NA	17.833333333333332	NA	NA	NA	NA	NA	NA	NA
Ral	18	31	7.15.2	8	69	116	100	6.5	3.2	15.6	9.26	33.07	NA	NA	19.416666666666668	NA	NA	NA	NA	NA	NA	NA
Ral	18	24	7.14.2	8	70	114	100	6.4	3.1	14.8	9.42	33.76	NA	NA	20.333333333333332	NA	NA	NA	NA	NA	NA	NA
Ral	18	52	7.13.2	8	71	113	110	6.9	3.4	17.6	8.69	40.99	NA	NA	20	NA	NA	NA	NA	NA	NA	NA
Ral	18	18	7.12.2	8	72	109	80	6.3	3	14.2	8.73	29.2	NA	NA	19.333333333333332	NA	NA	NA	NA	NA	NA	NA
Ral	18	14	7.11.2	8	73	114	90	6.6	3.1	15.2	7.19	29.35	NA	NA	22.333333333333332	NA	NA	NA	NA	NA	NA	NA
Ral	18	2	7.10.2	8	74	110	95	6.4	2.9	14	8.98	29.64	NA	NA	19.833333333333332	NA	NA	NA	NA	NA	NA	NA
Ral	18	13	7.9.2	8	75	113	112.5	6.7	3.2	16	9.02	34.69	NA	NA	21	NA	NA	NA	NA	NA	NA	NA
Ral	18	1	7.8.2	8	76	110	77.5	6.5	3.2	15.7	8.45	31.89	NA	NA	19.166666666666668	NA	NA	NA	NA	NA	NA	NA
Ral	18	12	7.7.2	8	77	108	82.5	6.4	3	14.4	8.79	29.2	NA	NA	19.166666666666668	NA	NA	NA	NA	NA	NA	NA
Ral	18	32	7.6.2	8	78	110	80	6.2	2.8	12.9	8.48	24.65	NA	NA	17.166666666666668	NA	NA	NA	NA	NA	NA	NA
Ral	18	10	7.5.2	8	79	109	95	5.9	3.1	13.7	8.68	28.37	NA	NA	19.666666666666668	NA	NA	NA	NA	NA	NA	NA
Ral	18	MPV57	7.4.2	8	80	110	95	6.2	3	14	9.19	29.08	NA	NA	20	NA	NA	NA	NA	NA	NA	NA
Ral	18	23	7.3.2	8	81	112	90	6.7	3	15	7.97	28.67	NA	NA	20.333333333333332	NA	NA	NA	NA	NA	NA	NA
Ral	18	62	7.2.2	8	82	109	95	6.7	3.2	16	8.96	34.33	NA	NA	19.833333333333332	NA	NA	NA	NA	NA	NA	NA
Ral	18	LA95135	7.1.2	8	83	110	100	6.6	3.2	15.8	8.87	33.98	NA	NA	16.833333333333332	NA	NA	NA	NA	NA	NA	NA
Ral	18	280	6.20.2	8	85	108	70	6.5	2.7	13.2	6.73	24.47	NA	NA	18.166666666666668	NA	NA	NA	NA	NA	NA	NA
Ral	18	241	6.19.2	8	86	117	110	6.3	3.2	15	7.28	36.22	NA	NA	18	NA	NA	NA	NA	NA	NA	NA
Ral	18	MPV57	6.18.2	8	87	112	90	6.1	3	13.9	7.81	28.5	NA	NA	19.666666666666668	NA	NA	NA	NA	NA	NA	NA
Ral	18	253	6.17.2	8	88	106	95	6.5	3.2	15.2	7.7	33.33	NA	NA	19.5	NA	NA	NA	NA	NA	NA	NA
Ral	18	237	6.16.2	8	89	108	90	6.2	3.1	14.3	8.78	31.93	NA	NA	17.666666666666668	NA	NA	NA	NA	NA	NA	NA
Ral	18	258	6.15.2	8	90	107	90	6.7	3.1	15.8	7.93	32.24	NA	NA	18.166666666666668	NA	NA	NA	NA	NA	NA	NA
Ral	18	249	6.14.2	8	91	113	80	6.3	2.8	13.2	6.71	24.94	NA	NA	18.833333333333332	NA	NA	NA	NA	NA	NA	NA
Ral	18	223	6.13.2	8	92	114	105	6.2	2.9	13.6	7.74	25.8	NA	NA	20.333333333333332	NA	NA	NA	NA	NA	NA	NA
Ral	18	268	6.12.2	8	93	112	85	6.3	3.1	14.4	7.71	28.77	NA	NA	19	NA	NA	NA	NA	NA	NA	NA
Ral	18	281	6.11.2	8	94	107	90	6.4	3	14.4	7.62	29.31	NA	NA	20.5	NA	NA	NA	NA	NA	NA	NA
Ral	18	260	6.10.2	8	95	115	80	6	3	13.6	7.36	26.38	NA	NA	20	NA	NA	NA	NA	NA	NA	NA
Ral	18	256	6.9.2	8	96	114	100	6	3.2	14.2	9.14	30.37	NA	NA	19.833333333333332	NA	NA	NA	NA	NA	NA	NA
Ral	18	232	6.8.2	8	97	110	95	6.5	3.2	15.9	7.63	36.33	NA	NA	16.5	NA	NA	NA	NA	NA	NA	NA
Ral	18	218	6.7.2	8	98	109	95	6.4	3.3	15.6	8.7	35.08	NA	NA	21	NA	NA	NA	NA	NA	NA	NA
Ral	18	272	6.6.2	8	99	113	90	6.3	3.1	14.7	7.25	28.43	NA	NA	20.333333333333332	NA	NA	NA	NA	NA	NA	NA
Ral	18	231	6.5.2	8	100	109	85	5.9	3.1	13.7	8.26	30.04	NA	NA	19.5	NA	NA	NA	NA	NA	NA	NA
Ral	18	LA95135	6.4.2	8	101	112	100	6.8	3.3	16.7	8.28	37.81	NA	NA	17.333333333333332	NA	NA	NA	NA	NA	NA	NA
Ral	18	236	6.3.2	8	102	113	105	6.5	3.6	17.7	7.73	42.24	NA	NA	21.333333333333332	NA	NA	NA	NA	NA	NA	NA
Ral	18	269	6.2.2	8	103	117	115	6.3	3.1	14.7	8.06	31.98	NA	NA	21.583333333333332	NA	NA	NA	NA	NA	NA	NA
Ral	18	LA95135	6.1.2	8	104	110	105	6.6	3.2	16.1	7.44	36.29	NA	NA	17.5	NA	NA	NA	NA	NA	NA	NA
Ral	18	122	10.20.1	9	1	117	102.5	6.3	3.1	14.8	9.12	31.89	NA	NA	18.666666666666668	NA	NA	NA	NA	NA	NA	NA
Ral	18	144	10.19.1	9	2	114	115	6.4	3.1	15.1	8.42	32.38	NA	NA	22	NA	NA	NA	NA	NA	NA	NA
Ral	18	142	10.18.1	9	3	115	87.5	6.3	3.1	14.8	7.79	29.51	NA	NA	20.333333333333332	NA	NA	NA	NA	NA	NA	NA
Ral	18	MPV57	10.17.1	9	4	112	90	6.2	3.1	14.2	8.6	28.48	NA	NA	21.333333333333332	NA	NA	NA	NA	NA	NA	NA
Ral	18	108	10.16.1	9	5	120	65	5.6	2.8	11.9	6.85	18.98	NA	NA	21.166666666666668	NA	NA	NA	NA	NA	NA	NA
Ral	18	125	10.15.1	9	6	117	75	6	2.9	13	7.24	23.82	NA	NA	22	NA	NA	NA	NA	NA	NA	NA
Ral	18	139	10.14.1	9	7	112	82.5	6.2	3	14	8.63	29.55	NA	NA	19.5	NA	NA	NA	NA	NA	NA	NA
Ral	18	103	10.13.1	9	8	107	100	6.6	3	14.5	8.26	28.88	NA	NA	19.166666666666668	NA	NA	NA	NA	NA	NA	NA
Ral	18	105	10.12.1	9	9	113	90	6.4	3.1	14.7	7.12	28.03	NA	NA	20.166666666666668	NA	NA	NA	NA	NA	NA	NA
Ral	18	128	10.11.1	9	10	108	107.2	6.5	3.2	15.6	9.13	35.53	NA	NA	19.833333333333332	NA	NA	NA	NA	NA	NA	NA
Ral	18	LA95135	10.10.1	9	11	114	105	6.5	3.1	15	6.69	32.01	NA	NA	17.833333333333332	NA	NA	NA	NA	NA	NA	NA
Ral	18	141	10.9.1	9	12	113	112.5	6.9	3.2	16.7	7.6	38.58	NA	NA	20.333333333333332	NA	NA	NA	NA	NA	NA	NA
Ral	18	79	10.8.1	9	13	117	97.5	6.2	3.1	14.4	8.23	31.29	NA	NA	23.833333333333332	NA	NA	NA	NA	NA	NA	NA
Ral	18	137	10.7.1	9	14	118	102.5	6.2	3.1	14.4	8.29	31.28	NA	NA	25	NA	NA	NA	NA	NA	NA	NA
Ral	18	134	10.6.1	9	15	109	95	5.9	3.1	13.6	8.99	28.36	NA	NA	20.583333333333332	NA	NA	NA	NA	NA	NA	NA
Ral	18	118	10.5.1	9	16	114	107.5	6.6	3	14.8	8.59	29.83	NA	NA	21.5	NA	NA	NA	NA	NA	NA	NA
Ral	18	135	10.4.1	9	17	105	95	6.9	3.3	16.9	9.6	38.1	NA	NA	18.333333333333332	NA	NA	NA	NA	NA	NA	NA
Ral	18	114	10.3.1	9	18	110	80	6.2	3	13.8	8.89	27.87	NA	NA	20.666666666666668	NA	NA	NA	NA	NA	NA	NA
Ral	18	113	10.2.1	9	19	117	85	6.2	3.2	14.7	7.64	30.81	NA	NA	23	NA	NA	NA	NA	NA	NA	NA
Ral	18	194	9.20.1	9	22	107	85	6.7	3	15.1	8.62	30.03	NA	NA	22.333333333333332	NA	NA	NA	NA	NA	NA	NA
Ral	18	216	9.19.1	9	23	120	75	6.1	2.9	13.1	5.61	22.99	NA	NA	23.666666666666668	NA	NA	NA	NA	NA	NA	NA
Ral	18	MPV57	9.18.1	9	24	115	85	6.1	3.1	14	8.78	27.87	NA	NA	21.833333333333332	NA	NA	NA	NA	NA	NA	NA
Ral	18	179	9.17.1	9	25	117	100	6.6	3.2	15.3	8.73	32.45	NA	NA	22.333333333333332	NA	NA	NA	NA	NA	NA	NA
Ral	18	204	9.16.1	9	26	114	92.5	6	3.2	14.3	6.34	27.57	NA	NA	21.166666666666668	NA	NA	NA	NA	NA	NA	NA
Ral	18	213	9.15.1	9	27	119	107.5	7	3.3	17.2	7.3	38.42	NA	NA	20.666666666666668	NA	NA	NA	NA	NA	NA	NA
Ral	18	151	9.14.1	9	28	114	105	6.4	3.5	16.7	8.94	37.25	NA	NA	22	NA	NA	NA	NA	NA	NA	NA
Ral	18	211	9.13.1	9	29	114	85	6.1	3.1	14.4	8.68	31.56	NA	NA	20.166666666666668	NA	NA	NA	NA	NA	NA	NA
Ral	18	182	9.12.1	9	30	117	107.5	6.8	3.3	16.3	9.38	35.4	NA	NA	21.666666666666668	NA	NA	NA	NA	NA	NA	NA
Ral	18	203	9.11.1	9	31	112	95	6.2	3.1	14.6	8.99	32.45	NA	NA	20.666666666666668	NA	NA	NA	NA	NA	NA	NA
Ral	18	165	9.10.1	9	32	118	75	5.8	3	13	7.12	22.97	NA	NA	23.666666666666668	NA	NA	NA	NA	NA	NA	NA
Ral	18	206	9.9.1	9	33	112	70	6.3	2.7	12.4	6.73	20.84	NA	NA	18.833333333333332	NA	NA	NA	NA	NA	NA	NA
Ral	18	183	9.8.1	9	34	118	80	6.2	2.8	13	7.73	24.23	NA	NA	22.333333333333332	NA	NA	NA	NA	NA	NA	NA
Ral	18	193	9.7.1	9	35	109	80	6.4	3	14.2	7.6	25.42	NA	NA	18.333333333333332	NA	NA	NA	NA	NA	NA	NA
Ral	18	186	9.6.1	9	36	109	75	6.4	2.8	13	8.75	25.36	NA	NA	18.833333333333332	NA	NA	NA	NA	NA	NA	NA
Ral	18	177	9.5.1	9	37	117	82.5	6.3	2.9	13.7	6.93	24.32	NA	NA	22	NA	NA	NA	NA	NA	NA	NA
Ral	18	188	9.4.1	9	38	111	107.5	6.4	3.3	15.7	8.62	35.04	NA	NA	19.166666666666668	NA	NA	NA	NA	NA	NA	NA
Ral	18	162	9.3.1	9	39	114	97.5	6.5	3	14.4	7.83	26.28	NA	NA	21.333333333333332	NA	NA	NA	NA	NA	NA	NA
Ral	18	195	9.2.1	9	40	112	97.5	6	3	13.5	8.36	25.57	NA	NA	20.333333333333332	NA	NA	NA	NA	NA	NA	NA
Ral	18	310	8.20.1	9	43	116	112.5	6.8	3.2	16.5	7.45	35.48	NA	NA	22	NA	NA	NA	NA	NA	NA	NA
Ral	18	313	8.19.1	9	44	116	97.5	6.2	2.8	13.2	5.39	22.18	NA	NA	22.5	NA	NA	NA	NA	NA	NA	NA
Ral	18	358	8.18.1	9	45	117	105	6.5	3.2	15.7	8.47	34.86	NA	NA	20.833333333333332	NA	NA	NA	NA	NA	NA	NA
Ral	18	MPV57	8.17.1	9	46	115	87.5	6	3	13.4	8.01	26.01	NA	NA	22	NA	NA	NA	NA	NA	NA	NA
Ral	18	228	8.16.1	9	47	114	82.5	5.8	2.7	11.9	7.17	21.99	NA	NA	21.833333333333332	NA	NA	NA	NA	NA	NA	NA
Ral	18	296	8.15.1	9	48	109	77.5	6.1	2.7	12.3	7.17	22.13	NA	NA	20.666666666666668	NA	NA	NA	NA	NA	NA	NA
Ral	18	304	8.14.1	9	49	115	90	6	2.9	13	6.62	22.99	NA	NA	22.5	NA	NA	NA	NA	NA	NA	NA
Ral	18	LA95135	8.13.1	9	50	113	97.5	6.4	2.9	13.9	8.09	28.29	NA	NA	18.5	NA	NA	NA	NA	NA	NA	NA
Ral	18	317	8.12.1	9	51	109	77.5	5.9	3	13	7.19	23.27	NA	NA	21	NA	NA	NA	NA	NA	NA	NA
Ral	18	292	8.11.1	9	52	114	112.5	6.2	3	14	8.26	30.59	NA	NA	17.166666666666668	NA	NA	NA	NA	NA	NA	NA
Ral	18	354	8.10.1	9	53	114	115	6.1	3.2	14.3	7.95	30.46	NA	NA	21.666666666666668	NA	NA	NA	NA	NA	NA	NA
Ral	18	305	8.9.1	9	54	115	70	6.1	2.9	13.3	6.63	23.43	NA	NA	23.166666666666668	NA	NA	NA	NA	NA	NA	NA
Ral	18	350	8.8.1	9	55	111	100	6.1	2.9	12.9	7.68	25.02	NA	NA	21.333333333333332	NA	NA	NA	NA	NA	NA	NA
Ral	18	291	8.7.1	9	56	115	90	6.4	3	14.1	8.36	27.32	NA	NA	22.5	NA	NA	NA	NA	NA	NA	NA
Ral	18	336	8.6.1	9	57	117	110	6.8	3.1	15.7	8.33	32.8	NA	NA	20.5	NA	NA	NA	NA	NA	NA	NA
Ral	18	294	8.5.1	9	58	110	95	6.3	3.1	14.6	8.57	31.05	NA	NA	18.666666666666668	NA	NA	NA	NA	NA	NA	NA
Ral	18	325	8.4.1	9	59	109	95	6.4	3	14.3	7.57	27.33	NA	NA	20.5	NA	NA	NA	NA	NA	NA	NA
Ral	18	347	8.3.1	9	60	116	85	6	2.8	12.7	6.69	22.99	NA	NA	21.833333333333332	NA	NA	NA	NA	NA	NA	NA
Ral	18	345	8.2.1	9	61	113	95	6.4	3.3	15.8	7.43	32.3	NA	NA	21	NA	NA	NA	NA	NA	NA	NA
Ral	18	65	7.20.1	9	64	114	92.5	6.6	3.2	15.5	8.53	32.43	NA	NA	22	NA	NA	NA	NA	NA	NA	NA
Ral	18	72	7.19.1	9	65	119	95	7	3.1	16.1	7.85	32.85	NA	NA	23.666666666666668	NA	NA	NA	NA	NA	NA	NA
Ral	18	26	7.18.1	9	66	119	105	6.6	3.1	15.3	8.59	31.93	NA	NA	21.666666666666668	NA	NA	NA	NA	NA	NA	NA
Ral	18	46	7.17.1	9	67	119	107.5	7	3.3	17.2	8.84	39.29	NA	NA	19.333333333333332	NA	NA	NA	NA	NA	NA	NA
Ral	18	47	7.16.1	9	68	109	92.5	6.4	3.2	15.3	8.76	32.21	NA	NA	15.5	NA	NA	NA	NA	NA	NA	NA
Ral	18	5	7.15.1	9	69	116	107.5	6.5	3.2	15.7	9.66	35.78	NA	NA	20.333333333333332	NA	NA	NA	NA	NA	NA	NA
Ral	18	48	7.14.1	9	70	108	107.5	6.6	3.4	16.8	9.17	38.69	NA	NA	19.666666666666668	NA	NA	NA	NA	NA	NA	NA
Ral	18	37	7.13.1	9	71	118	82.5	6.2	2.9	13.5	7.15	23.06	NA	NA	22.666666666666668	NA	NA	NA	NA	NA	NA	NA
Ral	18	21	7.12.1	9	72	110	82.5	6	3.1	13.7	8.43	25.32	NA	NA	22.166666666666668	NA	NA	NA	NA	NA	NA	NA
Ral	18	27	7.11.1	9	73	109	100	6.5	3.2	15.5	8.94	32.75	NA	NA	19.5	NA	NA	NA	NA	NA	NA	NA
Ral	18	25	7.10.1	9	74	109	100	6.5	3	14.5	8.72	29.36	NA	NA	18.833333333333332	NA	NA	NA	NA	NA	NA	NA
Ral	18	17	7.9.1	9	75	115	97.5	6.5	3.2	15.5	8.4	31.11	NA	NA	21.6	NA	NA	NA	NA	NA	NA	NA
Ral	18	15	7.8.1	9	76	120	70	5.9	2.8	12.4	6.06	22.2	NA	NA	20	NA	NA	NA	NA	NA	NA	NA
Ral	18	11	7.7.1	9	77	109	92.5	6.2	3.1	14.3	7.95	28.39	NA	NA	21	NA	NA	NA	NA	NA	NA	NA
Ral	18	4	7.6.1	9	78	109	75	6.7	3.1	15	9.12	31.02	NA	NA	17.166666666666668	NA	NA	NA	NA	NA	NA	NA
Ral	18	9	7.5.1	9	79	115	80	6.2	2.8	13	7.48	22.33	NA	NA	23.833333333333332	NA	NA	NA	NA	NA	NA	NA
Ral	18	35	7.4.1	9	80	108	105	6.7	3.2	16	9.38	34.36	NA	NA	18.666666666666668	NA	NA	NA	NA	NA	NA	NA
Ral	18	34	7.3.1	9	81	112	100	6.6	3.1	15	8.68	31	NA	NA	18.833333333333332	NA	NA	NA	NA	NA	NA	NA
Ral	18	6	7.2.1	9	82	108	90	6.6	3.1	15.3	8.59	30.35	NA	NA	20.833333333333332	NA	NA	NA	NA	NA	NA	NA
Ral	18	262	6.20.1	9	85	113	110	6.5	3.1	14.9	7.68	29.65	NA	NA	19.833333333333332	NA	NA	NA	NA	NA	NA	NA
Ral	18	239	6.19.1	9	86	113	107.5	6.2	3.4	15.5	8.37	35.17	NA	NA	18.333333333333332	NA	NA	NA	NA	NA	NA	NA
Ral	18	288	6.18.1	9	87	117	95	6.3	3.2	15.2	7.56	32.31	NA	NA	21.833333333333332	NA	NA	NA	NA	NA	NA	NA
Ral	18	238	6.17.1	9	88	116	80	6.4	3	14.5	7.86	27.68	NA	NA	23	NA	NA	NA	NA	NA	NA	NA
Ral	18	229	6.16.1	9	89	112	82.5	6.7	3.1	15.9	6.75	33.92	NA	NA	18	NA	NA	NA	NA	NA	NA	NA
Ral	18	226	6.15.1	9	90	112	82.5	6.4	3.1	14.8	6.97	27.99	NA	NA	21.666666666666668	NA	NA	NA	NA	NA	NA	NA
Ral	18	240	6.14.1	9	91	113	82.5	6.5	3	14.6	7.19	27.34	NA	NA	18.833333333333332	NA	NA	NA	NA	NA	NA	NA
Ral	18	LA95135	6.13.1	9	92	112	95	6.7	3.2	15.9	6.71	34.59	NA	NA	17.666666666666668	NA	NA	NA	NA	NA	NA	NA
Ral	18	233	6.12.1	9	93	112	72.5	6.2	3	13.8	7.12	28.37	NA	NA	17	NA	NA	NA	NA	NA	NA	NA
Ral	18	254	6.11.1	9	94	115	90	6.4	3.1	15.1	6.67	28.14	NA	NA	22.5	NA	NA	NA	NA	NA	NA	NA
Ral	18	219	6.10.1	9	95	110	100	6.4	3.2	15.3	9.25	32.12	NA	NA	19.5	NA	NA	NA	NA	NA	NA	NA
Ral	18	235	6.9.1	9	96	116	80	6.1	2.9	13.1	7.04	25.32	NA	NA	21.833333333333332	NA	NA	NA	NA	NA	NA	NA
Ral	18	283	6.8.1	9	97	114	75	6.4	3.1	14.7	7.8	28.78	NA	NA	18.5	NA	NA	NA	NA	NA	NA	NA
Ral	18	248	6.7.1	9	98	117	87.5	6.6	3	15	8.3	29.64	NA	NA	21.833333333333332	NA	NA	NA	NA	NA	NA	NA
Ral	18	222	6.6.1	9	99	120	115	6.3	3.1	14.5	8.39	30.29	NA	NA	21	NA	NA	NA	NA	NA	NA	NA
Ral	18	251	6.5.1	9	100	113	87.5	6.2	3	14.2	8	28.78	NA	NA	19.166666666666668	NA	NA	NA	NA	NA	NA	NA
Ral	18	243	6.4.1	9	101	112	75	6.2	3	13.9	7.67	27.89	NA	NA	19.166666666666668	NA	NA	NA	NA	NA	NA	NA
Ral	18	278	6.3.1	9	102	107	90	6.2	3	13.6	7.13	27.64	NA	NA	19.5	NA	NA	NA	NA	NA	NA	NA
Ral	18	242	6.2.1	9	103	107	95	6.6	3	14.5	7.14	26.35	NA	NA	20.833333333333332	NA	NA	NA	NA	NA	NA	NA
Kin	19	283	3.20.4	1	1	110	85	6.407	2.984	14.032	NA	32.063	2.106666666666667	10.714285714285714	22.571428571428573	1.9936708860759493	45	10.1	139.6	0	NA	NA
Kin	19	MPV	3.19.4	1	2	105	92.5	5.853	3.005	12.891	NA	27.056	2.496	8.928571428571429	22.285714285714285	2.4166666666666665	53.857142857142854	10.2	136.1	10	NA	NA
Kin	19	254	3.18.4	1	3	106	85	6.133	2.891	13.014	NA	27.397	2.177391304347826	10.267857142857142	22.357142857142858	2.3322683706070286	52.142857142857146	10	158.6	5	NA	NA
Kin	19	235	3.17.4	1	4	108	87.5	5.829	2.769	11.929	NA	27.094	1.9865771812080537	10.642857142857142	21.142857142857142	2.7432432432432434	58	11	136.3	NA	NA	NA
Kin	19	223	3.16.4	1	5	104	105	6.079	2.995	13.412	NA	30.548	2.3370786516853927	9.535714285714286	22.285714285714285	2.2243589743589745	49.57142857142857	10.6	192.1	0	NA	NA
Kin	19	264	3.15.4	1	6	105	80	5.939	2.996	13.119	NA	31.214	2.2329317269076308	8.892857142857142	19.857142857142858	2.4892086330935252	49.42857142857143	10.8	119	5	NA	NA
Kin	19	249	3.14.4	1	7	104	75	6.148	2.938	13.338	NA	31.232	2.4262295081967213	8.714285714285714	21.142857142857142	2.358108108108108	49.857142857142854	10.9	175.4	0	NA	NA
Kin	19	226	3.13.4	1	8	102	97.5	6.181	2.961	13.585	NA	31.307	2.274809160305343	9.357142857142858	21.285714285714285	2.208053691275168	47	10.3	204.9	0	NA	NA
Kin	19	250	3.12.4	1	9	102	112.5	5.862	3.059	13.021	NA	32.456	2.319702602230483	9.607142857142858	22.285714285714285	2.1923076923076925	48.857142857142854	11.1	184	10	NA	NA
Kin	19	229	3.11.4	1	10	104	90	6.308	3.008	14.044	NA	32.476	2.3426294820717133	8.964285714285714	21	2.1156462585034013	44.42857142857143	10.1	179.3	0	NA	NA
Kin	19	252	3.10.4	1	11	106	80	5.831	2.818	12.138	NA	23.038	2.5428571428571427	10	25.428571428571427	2.2191011235955056	56.42857142857143	9.1	112.3	10	NA	NA
Kin	19	LA	3.9.4	1	12	104	102.5	6.176	2.916	13.299	NA	31.832	2.159695817490494	9.392857142857142	20.285714285714285	2.3450704225352115	47.57142857142857	10.6	188.8	0	NA	NA
Kin	19	251	3.8.4	1	13	106	92.5	5.681	2.691	11.392	NA	23.419	1.9731543624161074	10.642857142857142	21	2.9047619047619047	61	10	169.5	15	NA	NA
Kin	19	217	3.7.4	1	14	102	127.5	6.667	3.185	15.715	NA	39.057	2.128	8.928571428571429	19	2.2330827067669174	42.42857142857143	11.6	197.3	0	NA	NA
Kin	19	265	3.6.4	1	15	102	80	6.273	2.932	13.541	NA	29.363	2.4695652173913043	8.214285714285714	20.285714285714285	2.5422535211267605	51.57142857142857	10.6	149.7	25	NA	NA
Kin	19	227	3.5.4	1	16	107	90	6.431	3.014	14.276	NA	32.622	2	10.428571428571429	20.857142857142858	2.2465753424657535	46.857142857142854	10.7	201.8	0	NA	NA
Kin	19	233	3.4.4	1	17	104	77.5	5.924	2.965	12.682	NA	28.455	2.352	8.928571428571429	21	2.510204081632653	52.714285714285715	10.5	180.8	15	NA	NA
Kin	19	239	3.3.4	1	18	106	120	5.675	3.143	12.993	NA	30.899	2.11070110701107	9.678571428571429	20.428571428571427	2.4895104895104896	50.857142857142854	11	198.7	50	NA	NA
Kin	19	231	3.2.4	1	19	103	85	5.713	2.807	11.82	NA	25.316	2.219178082191781	10.428571428571429	23.142857142857142	2.4382716049382718	56.42857142857143	10	141.7	15	NA	NA
Kin	19	MPV	3.1.4	1	20	106	87.5	5.832	2.76	11.741	NA	24.427	2.571428571428571	9	23.142857142857142	2.425925925925926	56.142857142857146	9.6	151.4	15	NA	NA
Kin	19	141	2.20.4	1	21	104	115	6.495	3.062	14.674	NA	35.439	2.0277777777777777	10.285714285714286	20.857142857142858	1.952054794520548	40.714285714285715	10.1	159.4	0	NA	NA
Kin	19	83	2.19.4	1	22	107	77.5	6.24	2.755	12.389	NA	27.826	2.198581560283688	10.071428571428571	22.142857142857142	2.225806451612903	49.285714285714285	9.6	167.5	15	NA	NA
Kin	19	143	2.18.4	1	23	108	90	5.97	2.849	12.496	NA	26.954	2.3709677419354835	8.857142857142858	21	2.5238095238095237	53	10	124.8	0	NA	NA
Kin	19	105	2.17.4	1	24	105	80	6.13	3.007	13.562	NA	32.166	1.9531772575250836	10.678571428571429	20.857142857142858	2.1506849315068495	44.857142857142854	10.1	119.9	5	NA	NA
Kin	19	LA	2.16.4	1	25	103	95	6.337	3.025	14.143	NA	34.211	2.108527131782946	9.214285714285714	19.428571428571427	2.235294117647059	43.42857142857143	10.4	153.7	0	NA	NA
Kin	19	137	2.15.4	1	26	106	105	5.684	2.901	12.164	NA	29.379	2.4341637010676154	10.035714285714286	24.428571428571427	2.0701754385964914	50.57142857142857	10.4	144.5	5	NA	NA
Kin	19	91	2.14.4	1	27	105	77.5	5.995	2.744	12.219	NA	22.704	2.377510040160643	8.892857142857142	21.142857142857142	2.6486486486486487	56	8.9	106.1	0	NA	NA
Kin	19	122	2.13.4	1	28	107	100	5.998	3.037	13.505	NA	32.738	2.422764227642276	8.785714285714286	21.285714285714285	2.2550335570469797	48	11	101.4	0	NA	NA
Kin	19	135	2.12.4	1	29	100	82.5	6.397	3.072	14.21	NA	35.216	2.2666666666666666	8.571428571428571	19.428571428571427	2.213235294117647	43	10.6	157.4	0	NA	NA
Kin	19	106	2.11.4	1	30	107	105	5.945	2.962	13.006	NA	31.452	2.057553956834532	9.928571428571429	20.428571428571427	2.6013986013986012	53.142857142857146	11.7	160.6	0	NA	NA
Kin	19	73	2.10.4	1	31	104	87.5	NA	NA	NA	NA	NA	NA	8.357142857142858	22.714285714285715	NA	NA	NA	123.8	0	NA	NA
Kin	19	129	2.9.4	1	32	101	77.5	6.321	2.866	13.37	NA	30.267	2.3305785123966944	8.642857142857142	20.142857142857142	2.3900709219858154	48.142857142857146	10.2	165.6	0	NA	NA
Kin	19	96	2.8.4	1	33	111	102.5	5.831	3.037	12.969	NA	28.689	2.2091503267973853	10.928571428571429	24.142857142857142	2.165680473372781	52.285714285714285	10.5	143.9	5	NA	NA
Kin	19	95	2.7.4	1	34	107	80	5.918	2.873	12.587	NA	27.441	2.0977198697068404	10.964285714285714	23	2.3540372670807455	54.142857142857146	10.4	170.2	20	NA	NA
Kin	19	89	2.6.4	1	35	109	87.5	5.747	2.842	12.435	NA	24.752	2.179310344827586	10.357142857142858	22.571428571428573	2.5569620253164556	57.714285714285715	10	100.7	5	NA	NA
Kin	19	123	2.5.4	1	36	108	87.5	5.514	2.711	11.058	NA	21.951	2.233576642335766	9.785714285714286	21.857142857142858	2.947712418300654	64.42857142857143	9.9	105.7	10	NA	NA
Kin	19	77	2.4.4	1	37	103	85	5.645	3.042	12.785	NA	29.467	2.3285714285714283	10	23.285714285714285	1.9570552147239264	45.57142857142857	9.4	139.8	5	NA	NA
Kin	19	124	2.3.4	1	38	104	105	5.931	2.888	12.733	NA	29.38	2.319702602230483	9.607142857142858	22.285714285714285	2.378205128205128	53	10.9	177	0	NA	NA
Kin	19	99	2.2.4	1	39	103	92.5	6.182	3.128	14.117	NA	34.639	2.508771929824561	8.142857142857142	20.428571428571427	2.3216783216783217	47.42857142857143	11.5	169.1	0	NA	NA
Kin	19	LA	2.1.4	1	40	104	100	6.325	3.01	13.988	NA	34.076	2.0454545454545454	9.428571428571429	19.285714285714285	2.325925925925926	44.857142857142854	10.7	190.7	0	NA	NA
Kin	19	215	1.20.4	1	41	104	105	5.695	3.088	12.893	NA	30.267	2.1884057971014492	9.857142857142858	21.571428571428573	2.2317880794701987	48.142857142857146	10.2	159.6	50	NA	NA
Kin	19	153	1.19.4	1	42	104	115	6.051	3.043	13.553	NA	32.087	2.3071161048689137	9.535714285714286	22	2.0844155844155843	45.857142857142854	10.3	181.8	15	NA	NA
Kin	19	207	1.18.4	1	43	104	70	6.131	2.897	12.941	NA	26.113	2.4489795918367343	8.75	21.428571428571427	2.2466666666666666	48.142857142857146	8.8	124.1	25	NA	NA
Kin	19	179	1.17.4	1	44	106	97.5	6.123	2.971	13.167	NA	29.226	2.1904761904761907	8.75	19.166666666666668	3.034782608695652	58.166666666666664	10.2	153.2	5	NA	NA
Kin	19	177	1.16.4	1	45	107	82.5	5.936	2.655	11.716	NA	21.483	2.3520599250936325	9.535714285714286	22.428571428571427	2.4904458598726116	55.857142857142854	8.4	109.5	25	NA	NA
Kin	19	189	1.15.4	1	46	106	105	5.735	2.913	12.216	NA	28.184	2.2480620155038764	9.214285714285714	20.714285714285715	2.5448275862068965	52.714285714285715	10.4	189	15	NA	NA
Kin	19	LA	1.14.4	1	47	105	95	6.345	3.113	14.486	NA	35.593	2.0821917808219177	9.125	19	2.587719298245614	49.166666666666664	10.5	213.9	0	NA	NA
Kin	19	172	1.13.4	1	48	103	105	6.229	3.16	14.436	NA	37.102	2.2487562189054726	10.05	22.6	2.504424778761062	56.6	10.5	292.6	20	NA	NA
Kin	19	181	1.12.4	1	49	105	85	5.847	2.779	12.12	NA	25.131	2.12624584717608	10.75	22.857142857142858	2.3875	54.57142857142857	9.6	95.9	5	NA	NA
Kin	19	166	1.11.4	1	50	105	102.5	6.435	3.196	14.876	NA	38.29	2.195804195804196	10.214285714285714	22.428571428571427	1.713375796178344	38.42857142857143	10.3	227	0	NA	NA
Kin	19	145	1.10.4	1	51	103	80	5.857	3.007	13.079	NA	31.902	2	10	20	2.716666666666667	54.333333333333336	10.4	259.4	10	NA	NA
Kin	19	185	1.9.4	1	52	103	90	6.209	3.025	14.044	NA	33.882	2.169741697416974	9.678571428571429	21	2.068027210884354	43.42857142857143	10.3	238.9	5	NA	NA
Kin	19	170	1.8.4	1	53	102	110	6.161	3.091	14.04	NA	31.077	2.1735159817351595	9.125	19.833333333333332	2.73109243697479	54.166666666666664	10.1	153.5	10	NA	NA
Kin	19	212	1.7.4	1	54	102	90	5.776	3.093	13.086	NA	31.288	2.493273542600897	7.964285714285714	19.857142857142858	2.3453237410071943	46.57142857142857	10.2	216.6	25	NA	NA
Kin	19	205	1.6.4	1	55	103	110	5.725	3.093	13.198	NA	31.307	2.0270270270270268	10.571428571428571	21.428571428571427	2.1933333333333334	47	10.3	208.2	5	NA	NA
Kin	19	190	1.5.4	1	56	102	92.5	5.954	3.054	13.437	NA	32.716	2.3130434782608695	9.583333333333334	22.166666666666668	2.43609022556391	54	10.6	243.3	5	NA	NA
Kin	19	148	1.4.4	1	57	102	82.5	6.2	2.76	12.551	NA	26.062	2.2813688212927756	9.392857142857142	21.428571428571427	2.3533333333333335	50.42857142857143	9.2	121	45	NA	NA
Kin	19	196	1.3.4	1	58	106	100	5.818	3.059	13.058	NA	28.824	2.5726872246696035	8.107142857142858	20.857142857142858	2.328767123287671	48.57142857142857	9.8	190.5	5	NA	NA
Kin	19	209	1.2.4	1	59	103	80	6.502	2.912	14.139	NA	30.094	2.575107296137339	8.321428571428571	21.428571428571427	2.1266666666666665	45.57142857142857	9.6	128	5	NA	NA
Kin	19	MPV	1.1.4	1	60	105	90	5.904	2.882	12.391	NA	26.01	2.4119850187265914	9.535714285714286	23	2.459627329192547	56.57142857142857	10.3	171.4	5	NA	NA
Kin	19	286	3.20.3	2	1	103	97.5	5.957	2.977	12.961	NA	31.594	2.5101214574898787	8.821428571428571	22.142857142857142	2.225806451612903	49.285714285714285	10.9	157.2	0	NA	NA
Kin	19	259	3.19.3	2	2	106	90	6.366	3.22	14.945	NA	37.184	2.1884057971014492	9.857142857142858	21.571428571428573	1.8344370860927153	39.57142857142857	10.3	168.9	10	NA	NA
Kin	19	240	3.18.3	2	3	104	90	6.206	2.857	13.189	NA	28.696	2.1437908496732025	10.928571428571429	23.428571428571427	2.1036585365853657	49.285714285714285	9.9	165.7	10	NA	NA
Kin	19	270	3.17.3	2	4	101	100	6.473	3.07	14.492	NA	36.678	2.1730103806228374	10.321428571428571	22.428571428571427	1.8407643312101911	41.285714285714285	10.6	189.7	15	NA	NA
Kin	19	269	3.16.3	2	5	108	117.5	6.1785	3.1035	14.0475	NA	34.131	2.1118421052631575	10.857142857142858	22.928571428571427	1.9190031152647975	44	10.5	160.7	15	NA	NA
Kin	19	253	3.15.3	2	6	97	100	6.12	3.066	13.594	NA	32.344	1.9934426229508198	10.892857142857142	21.714285714285715	2.2171052631578947	48.142857142857146	10.9	140.8	0	NA	NA
Kin	19	273	3.14.3	2	7	103	105	6.604	3.144	15.113	NA	38.768	2.2672064777327936	8.821428571428571	20	1.9714285714285715	39.42857142857143	10.7	234.5	0	NA	NA
Kin	19	236	3.13.3	2	8	105	115	6.221	3.426	15.438	NA	39.326	2.2525597269624575	10.464285714285714	23.571428571428573	1.6181818181818182	38.142857142857146	10.5	157.8	15	NA	NA
Kin	19	274	3.12.3	2	9	102	115	6.197	3.216	14.741	NA	38.255	2.0704225352112675	10.142857142857142	21	2.0272108843537415	42.57142857142857	11.4	248.2	0	NA	NA
Kin	19	224	3.11.3	2	10	105	87.5	5.333	2.917	11.32	NA	24.295	3.1844660194174756	7.357142857142857	23.428571428571427	2.8109756097560976	65.85714285714286	11.2	65.7	5	NA	NA
Kin	19	237	3.10.3	2	11	100	100	5.875	3.027	13.069	NA	33.136	2.4615384615384617	8.357142857142858	20.571428571428573	2.3472222222222223	48.285714285714285	11.2	142.5	0	NA	NA
Kin	19	267	3.9.3	2	12	105	80	6.427	2.864	13.728	NA	27.394	2.3065693430656933	9.785714285714286	22.571428571428573	2.3797468354430378	53.714285714285715	10.3	133.1	20	NA	NA
Kin	19	266	3.8.3	2	13	104	80	6.45	2.928	13.901	NA	30.357	2.5062240663900415	8.607142857142858	21.571428571428573	2.225165562913907	48	10.2	155	0	NA	NA
Kin	19	255	3.7.3	2	14	104	90	6.015	3.05	13.468	NA	33.945	2.387096774193548	8.857142857142858	21.142857142857142	2.2094594594594597	46.714285714285715	11.1	190.5	0	NA	NA
Kin	19	248	3.6.3	2	15	107	105	6.163	2.727	12.447	NA	25.128	2.0594059405940595	10.821428571428571	22.285714285714285	2.5	55.714285714285715	9.8	98.5	0	NA	NA
Kin	19	284	3.5.3	2	16	101	100	6.083	3.21	14.375	NA	35.959	2.4700460829493087	7.75	19.142857142857142	2.1791044776119404	41.714285714285715	10.5	140.8	10	NA	NA
Kin	19	222	3.4.3	2	17	108	120	5.943	3.027	13.351	NA	30.423	2.046511627906977	10.75	22	2.3051948051948052	50.714285714285715	10.8	194.1	5	NA	NA
Kin	19	279	3.2.3	2	19	101	105	6.099	3.185	14.146	NA	34.727	2.0729927007299267	9.785714285714286	20.285714285714285	2.1901408450704225	44.42857142857143	10.8	185	15	NA	NA
Kin	19	LA	3.1.3	2	20	104	97.5	6.351	3.041	14.333	NA	34.713	2.123076923076923	9.285714285714286	19.714285714285715	2.2753623188405796	44.857142857142854	10.9	150.2	0	NA	NA
Kin	19	139	2.19.3	2	22	104	80	5.966	3.055	13.515	NA	31.776	2.1684981684981683	9.75	21.142857142857142	2.168918918918919	45.857142857142854	10.2	120.6	5	NA	NA
Kin	19	102	2.18.3	2	23	105	120	5.967	3.016	13.211	NA	30.194	2.052980132450331	10.785714285714286	22.142857142857142	2.329032258064516	51.57142857142857	10.9	202.1	0	NA	NA
Kin	19	138	2.17.3	2	24	103	80	5.914	2.93	12.931	NA	29.508	2.1538461538461537	9.75	21	2.489795918367347	52.285714285714285	10.8	168.6	0	NA	NA
Kin	19	132	2.16.3	2	25	103	100	5.792	3.047	13.218	NA	31.564	2.125	10.285714285714286	21.857142857142858	2.3398692810457518	51.142857142857146	11.3	155.9	0	NA	NA
Kin	19	92	2.15.3	2	26	104	95	5.869	3	12.935	NA	30.723	2.3629893238434163	10.035714285714286	23.714285714285715	2	47.42857142857143	10.2	156	0	NA	NA
Kin	19	136	2.14.3	2	27	103	107.5	6.332	3.016	13.598	NA	29.7	2.1456953642384105	10.785714285714286	23.142857142857142	2.265432098765432	52.42857142857143	10.9	123	10	NA	NA
Kin	19	115	2.13.3	2	28	103	102.5	6.194	3.102	13.996	NA	33.945	2.1142857142857143	10	21.142857142857142	2.2094594594594597	46.714285714285715	11.1	107.6	10	NA	NA
Kin	19	MPV	2.12.3	2	29	106	85	5.845	2.797	12.035	NA	25.301	NA	NA	NA	NA	NA	NA	93.1	10	NA	NA
Kin	19	127	2.11.3	2	30	106	80	5.707	2.889	12.145	NA	24.235	2.177049180327869	10.892857142857142	23.714285714285715	2.36144578313253	56	9.5	77.6	10	NA	NA
Kin	19	111	2.10.3	2	31	106	110	5.771	2.889	12.134	NA	26.866	2.4776119402985075	9.571428571428571	23.714285714285715	2.4216867469879517	57.42857142857143	10.8	60	10	NA	NA
Kin	19	109	2.9.3	2	32	103	77.5	5.991	2.961	13.026	NA	30.313	2.3797468354430382	8.464285714285714	20.142857142857142	2.269503546099291	45.714285714285715	9.7	100.1	0	NA	NA
Kin	19	81	2.8.3	2	33	107	80	5.761	2.913	12.413	NA	26.503	2.1621621621621623	10.571428571428571	22.857142857142858	2.2875	52.285714285714285	9.7	107.1	20	NA	NA
Kin	19	119	2.7.3	2	34	107	105	6.426	3.018	14.168	NA	33.553	2.011904761904762	12	24.142857142857142	1.7988165680473374	43.42857142857143	10.2	119.1	5	NA	NA
Kin	19	79	2.6.3	2	35	107	95	5.941	3.047	13.218	NA	29.62	2.369811320754717	9.464285714285714	22.428571428571427	2.343949044585987	52.57142857142857	10.9	85.8	20	NA	NA
Kin	19	104	2.5.3	2	36	102	77.5	6.18	2.987	13.584	NA	31.138	2.139194139194139	9.75	20.857142857142858	2.287671232876712	47.714285714285715	10.4	133.1	0	NA	NA
Kin	19	121	2.4.3	2	37	104	100	5.796	2.947	12.833	NA	28.134	2.279569892473118	9.3	21.2	3.3867924528301887	71.8	10.1	127	0	NA	NA
Kin	19	108	2.3.3	2	38	106	95	5.703	2.933	12.332	NA	25.743	2.064981949458484	9.892857142857142	20.428571428571427	2.825174825174825	57.714285714285715	10.4	122.5	5	NA	NA
Kin	19	131	2.2.3	2	39	106	92.5	6.191	3.16	14.163	NA	31.25	2.0228136882129277	10.958333333333334	22.166666666666668	2.406015037593985	53.333333333333336	10	131.4	20	NA	NA
Kin	19	MPV	2.1.3	2	40	106	92.5	5.843	2.898	12.405	NA	27.041	2.373134328358209	9.571428571428571	22.714285714285715	2.4654088050314464	56	10.6	82	10	NA	NA
Kin	19	156	1.20.3	2	41	103	110	6.181	3.045	13.54	NA	32.895	2.214022140221402	9.678571428571429	21.428571428571427	2.026666666666667	43.42857142857143	10	105.7	10	NA	NA
Kin	19	213	1.19.3	2	42	109	112.5	6.532	3.269	15.578	NA	33.569	2.2706766917293235	9.5	21.571428571428573	1.8741721854304636	40.42857142857143	9.5	95.8	20	NA	NA
Kin	19	MPV	1.18.3	2	43	106	90	5.928	2.994	12.943	NA	29.191	2.5669291338582676	9.071428571428571	23.285714285714285	2.1226993865030677	49.42857142857143	10.1	150.9	5	NA	NA
Kin	19	162	1.17.3	2	44	105	100	6.413	2.929	13.458	NA	27.731	2.467289719626168	7.642857142857143	18.857142857142858	2.7045454545454546	51	9.9	126.8	0	NA	NA
Kin	19	165	1.16.3	2	45	106	85	5.651	2.872	11.847	NA	24.576	2.48062015503876	9.214285714285714	22.857142857142858	2.2125	50.57142857142857	8.7	161.8	20	NA	NA
Kin	19	151	1.15.3	2	46	104	95	6.09	3.207	14.294	NA	34.694	2.3666666666666667	8.571428571428571	20.285714285714285	2.0704225352112675	42	10.2	103.4	0	NA	NA
Kin	19	187	1.14.3	2	47	104	100	5.912	3.013	13.081	NA	30.473	2.2435424354243545	9.678571428571429	21.714285714285715	2.223684210526316	48.285714285714285	10.3	140.4	0	NA	NA
Kin	19	198	1.13.3	2	48	104	82.5	6.406	3.015	14.081	NA	33.115	2.245614035087719	9.5	21.333333333333332	2.3828125	50.833333333333336	10.1	88.3	10	NA	NA
Kin	19	152	1.12.3	2	49	106	87.5	6.053	2.951	13.128	NA	27.72	2.352422907488987	9.458333333333334	22.25	2.891385767790262	64.33333333333333	10.7	77.2	10	NA	NA
Kin	19	192	1.11.3	2	50	106	100	5.957	2.993	12.919	NA	31.563	2.1978021978021975	9.75	21.428571428571427	2.1333333333333333	45.714285714285715	10.1	127.1	5	NA	NA
Kin	19	163	1.10.3	2	51	109	80	5.917	2.902	12.76	NA	27.095	2.3141762452107284	9.321428571428571	21.571428571428573	2.370860927152318	51.142857142857146	9.7	95.6	NA	NA	NA
Kin	19	210	1.9.3	2	52	105	102.5	6.121	3.113	14.078	NA	32.362	1.9840000000000002	10.416666666666666	20.666666666666668	2.4919354838709675	51.5	10	110.8	10	NA	NA
Kin	19	208	1.8.3	2	53	107	115	5.924	3.054	13.448	NA	31.544	2.245614035087719	10.178571428571429	22.857142857142858	1.8625	42.57142857142857	9.4	97.4	50	NA	NA
Kin	19	149	1.7.3	2	54	108	90	5.93	2.91	12.895	NA	24.865	2.242857142857143	10	22.428571428571427	2.356687898089172	52.857142857142854	9.2	89.5	35	NA	NA
Kin	19	169	1.6.3	2	55	107	90	6.319	3.087	14.475	NA	34.589	2.171003717472119	9.607142857142858	20.857142857142858	2	41.714285714285715	10.1	140	0	NA	NA
Kin	19	204	1.5.3	2	56	105	92.5	5.728	3.02	12.804	NA	26.11	2.20814479638009	9.208333333333334	20.333333333333332	3.139344262295082	63.833333333333336	10	99	25	NA	NA
Kin	19	199	1.4.3	2	57	107	107.5	5.75	2.762	11.679	NA	21.114	2.2473498233215548	10.107142857142858	22.714285714285715	2.710691823899371	61.57142857142857	9.1	90.5	20	NA	NA
Kin	19	183	1.3.3	2	58	106	75	5.978	2.759	12.171	NA	25.849	2.149253731343284	9.571428571428571	20.571428571428573	2.6597222222222223	54.714285714285715	9.9	84.2	5	NA	NA
Kin	19	195	1.2.3	2	59	104	102.5	5.753	2.989	12.873	NA	26.271	2.3414634146341466	8.541666666666666	20	2.95	59	9.3	107.7	0	NA	NA
Kin	19	LA	1.1.3	2	60	103	95	6.241	3.042	13.924	NA	32.542	2.1454545454545455	9.166666666666666	19.666666666666668	2.5	49.166666666666664	9.6	153.6	0	NA	NA
Kin	19	285	3.20.2	3	1	102	95	5.895	2.988	12.814	NA	31.111	2.2813688212927756	9.392857142857142	21.428571428571427	2.4	51.42857142857143	11.2	145.7	15	NA	NA
Kin	19	257	3.19.2	3	2	100	92.5	6.222	3.175	14.471	NA	33.038	2.3829787234042556	8.392857142857142	20	2.4214285714285713	48.42857142857143	11.2	164.4	0	NA	NA
Kin	19	232	3.18.2	3	3	101	102.5	NA	NA	NA	NA	NA	NA	8.982142857142858	18.714285714285715	NA	NA	NA	123	5	NA	NA
Kin	19	260	3.17.2	3	4	105	85	6.386	3.042	14.235	NA	31.269	2.3713080168776375	8.464285714285714	20.071428571428573	2.298932384341637	46.142857142857146	10.1	98.3	0	NA	NA
Kin	19	225	3.16.2	3	5	101	90	6.252	2.979	13.572	NA	34.451	2.2287822878228782	9.678571428571429	21.571428571428573	2.172185430463576	46.857142857142854	11.3	143.6	0	NA	NA
Kin	19	278	3.15.2	3	6	101	92.5	5.899	3.082	13.371	NA	33.232	2.3519313304721035	8.321428571428571	19.571428571428573	2.394160583941606	46.857142857142854	10.9	145.3	0	NA	NA
Kin	19	247	3.14.2	3	7	102	85	5.703	3.021	12.648	NA	30.919	2.2588235294117647	9.107142857142858	20.571428571428573	2.4930555555555554	51.285714285714285	11.1	129.5	10	NA	NA
Kin	19	272	3.13.2	3	8	104	95	6.135	2.983	13.43	NA	31.329	2.1792114695340503	9.964285714285714	21.714285714285715	2.0789473684210527	45.142857142857146	9.9	154.3	5	NA	NA
Kin	19	MPV	3.12.2	3	9	105	97.5	5.961	3	13.072	NA	30.194	2.6	8.571428571428571	22.285714285714285	2.3141025641025643	51.57142857142857	10.9	78.7	15	NA	NA
Kin	19	271	3.11.2	3	10	105	95	6.401	3.038	14.449	NA	29.942	2.1884057971014492	9.857142857142858	21.571428571428573	2.2781456953642385	49.142857142857146	10.3	132.8	0	NA	NA
Kin	19	220	3.10.2	3	11	105	92.5	6.715	2.842	14.026	NA	31.707	2.049122807017544	10.178571428571429	20.857142857142858	2.2465753424657535	46.857142857142854	10.4	91.4	0	NA	NA
Kin	19	262	3.9.2	3	12	105	112.5	6.208	2.994	13.839	NA	31.953	2.1911764705882355	9.714285714285714	21.285714285714285	2.2684563758389262	48.285714285714285	10.8	209.6	0	NA	NA
Kin	19	234	3.7.2	3	14	108	90	6.053	2.719	12.153	NA	26.055	2.3970588235294117	9.714285714285714	23.285714285714285	2.4723926380368098	57.57142857142857	10.5	119.1	0	NA	NA
Kin	19	256	3.6.2	3	15	105	107.5	5.732	3.063	12.854	NA	29.086	2.425196850393701	9.071428571428571	22	2.344155844155844	51.57142857142857	10.5	137.1	20	NA	NA
Kin	19	218	3.5.2	3	16	102	107.5	5.925	3.176	13.696	NA	29.48	2.353846153846154	9.285714285714286	21.857142857142858	2.261437908496732	49.42857142857143	10.2	117.4	15	NA	NA
Kin	19	244	3.4.2	3	17	103	92.5	6.332	2.998	14.004	NA	33.639	2.2388059701492535	9.571428571428571	21.428571428571427	2.18	46.714285714285715	11	114.2	0	NA	NA
Kin	19	238	3.3.2	3	18	108	80	6.286	2.802	13.193	NA	26.966	2.0533333333333337	10.714285714285714	22	2.311688311688312	50.857142857142854	9.6	97.3	0	NA	NA
Kin	19	245	3.2.2	3	19	106	100	5.75	2.933	12.436	NA	28.011	2.4738955823293174	8.892857142857142	22	2.3181818181818183	51	10	89.3	10	NA	NA
Kin	19	MPV	3.1.2	3	20	107	87.5	5.821	2.873	12.217	NA	25.416	2.49789029535865	8.464285714285714	21.142857142857142	2.8445945945945947	60.142857142857146	10.7	55.5	20	NA	NA
Kin	19	144	2.20.2	3	21	106	102.5	5.976	2.892	12.804	NA	30.079	2.1580756013745703	10.392857142857142	22.428571428571427	2.4140127388535033	54.142857142857146	11.4	92.4	35	NA	NA
Kin	19	94	2.19.2	3	22	107	107.5	6.202	2.922	13.156	NA	26.486	2.0458553791887124	10.125	20.714285714285715	2.5517241379310347	52.857142857142854	9.8	81	10	NA	NA
Kin	19	142	2.18.2	3	23	107	80	6.016	2.954	13.184	NA	28.571	2.193050193050193	9.25	20.285714285714285	2.612676056338028	53	10.6	98.9	0	NA	NA
Kin	19	82	2.17.2	3	24	104	95	6.428	3.116	14.897	NA	33.654	2.180392156862745	9.107142857142858	19.857142857142858	2.2446043165467624	44.57142857142857	10.5	78.4	0	NA	NA
Kin	19	87	2.16.2	3	25	105	67.5	5.902	2.59	11.233	NA	19.906	2.2706766917293235	9.5	21.571428571428573	2.827814569536424	61	8.5	38.8	35	NA	NA
Kin	19	120	2.15.2	3	26	110	80	6.218	2.868	13.04	NA	29.912	2.0931899641577063	9.964285714285714	20.857142857142858	2.335616438356164	48.714285714285715	10.2	79.2	0	NA	NA
Kin	19	116	2.14.2	3	27	104	85	6.062	2.844	12.83	NA	26.301	2.051282051282051	9.75	20	2.607142857142857	52.142857142857146	9.6	120.2	0	NA	NA
Kin	19	110	2.13.2	3	28	109	112.5	6.041	3.072	13.667	NA	29.859	2.207885304659498	9.964285714285714	22	2.3051948051948052	50.714285714285715	10.6	81.2	0	NA	NA
Kin	19	101	2.12.2	3	29	103	82.5	6.261	2.949	13.603	NA	31.776	2.095238095238095	9.75	20.428571428571427	2.2447552447552446	45.857142857142854	10.2	78.1	15	NA	NA
Kin	19	107	2.11.2	3	30	107	112.5	6.421	3.036	14.46	NA	35.621	2.1029411764705883	9.714285714285714	20.428571428571427	2.13986013986014	43.714285714285715	10.9	152.4	0	NA	NA
Kin	19	93	2.10.2	3	31	103	100	6.483	3.151	14.759	NA	36.162	2.0597014925373136	9.571428571428571	19.714285714285715	1.963768115942029	38.714285714285715	9.8	98.4	0	NA	NA
Kin	19	LA	2.9.2	3	32	104	95	6.253	2.964	13.645	NA	30.747	2.0142857142857142	10	20.142857142857142	2.4680851063829787	49.714285714285715	10.7	114.2	0	NA	NA
Kin	19	113	2.8.2	3	33	105	77.5	6.411	3.017	14.053	NA	32.414	1.985611510791367	9.928571428571429	19.714285714285715	2.101449275362319	41.42857142857143	9.4	73.3	10	NA	NA
Kin	19	114	2.6.2	3	35	103	95	5.736	2.835	12.07	NA	26.263	2.3759398496240602	9.5	22.571428571428573	2.5063291139240507	56.57142857142857	10.4	84.7	0	NA	NA
Kin	19	103	2.5.2	3	36	103	82.5	6.321	3.04	13.928	NA	31.922	2.3399209486166006	9.035714285714286	21.142857142857142	2.074324324324324	43.857142857142854	9.8	116.7	0	NA	NA
Kin	19	100	2.4.2	3	37	102	82.5	6.282	3.143	14.541	NA	38.065	2.4177777777777774	8.035714285714286	19.428571428571427	2.2794117647058822	44.285714285714285	11.8	130.4	0	NA	NA
Kin	19	86	2.3.2	3	38	106	75	6.178	3.173	14.329	NA	34.528	2.1868512110726646	10.321428571428571	22.571428571428573	1.9430379746835442	43.857142857142854	10.6	128.8	5	NA	NA
Kin	19	112	2.2.2	3	39	106	115	5.906	2.942	12.757	NA	28.788	2.33587786259542	9.357142857142858	21.857142857142858	2.588235294117647	56.57142857142857	11.4	94	10	NA	NA
Kin	19	LA	2.1.2	3	40	104	92.5	6.416	3.089	14.637	NA	36.559	2.0677966101694913	9.833333333333334	20.333333333333332	2.2868852459016393	46.5	10.2	148.5	0	NA	NA
Kin	19	206	1.20.2	3	41	103	72.5	6.072	2.749	12.226	NA	25.753	2.393574297188755	8.892857142857142	21.285714285714285	2.4496644295302015	52.142857142857146	9.4	130	15	NA	NA
Kin	19	214	1.19.2	3	42	104	105	6.033	3.182	14.238	NA	33.333	2.2057613168724277	8.678571428571429	19.142857142857142	2.3059701492537314	44.142857142857146	10.3	103.6	40	NA	NA
Kin	19	167	1.18.2	3	43	104	80	6.315	2.978	14.137	NA	30.519	2.2933333333333334	9.375	21.5	2.046511627906977	44	9.4	137.1	0	NA	NA
Kin	19	186	1.17.2	3	44	102	75	6.093	2.717	11.987	NA	26.902	2.19672131147541	8.714285714285714	19.142857142857142	2.746268656716418	52.57142857142857	9.9	93.9	0	NA	NA
Kin	19	155	1.16.2	3	45	103	90	5.605	2.895	11.98	NA	24.742	2.7610619469026547	8.071428571428571	22.285714285714285	2.4871794871794872	55.42857142857143	9.6	87.1	10	NA	NA
Kin	19	164	1.15.2	3	46	107	105	5.991	3.089	13.722	NA	31.894	2.5454545454545454	7.857142857142857	20	2.15	43	9.6	136.8	0	NA	NA
Kin	19	146	1.14.2	3	47	106	92.5	5.934	2.763	12.095	NA	24.8	2.0938628158844765	9.892857142857142	20.714285714285715	2.586206896551724	53.57142857142857	9.3	90.3	0	NA	NA
Kin	19	171	1.13.2	3	48	104	80	6.03	2.762	12.328	NA	24.011	2.036101083032491	9.892857142857142	20.142857142857142	2.6879432624113475	54.142857142857146	9.1	108.1	35	NA	NA
Kin	19	150	1.12.2	3	49	108	72.5	6.11	2.869	12.787	NA	27.545	2.397003745318352	9.535714285714286	22.857142857142858	2.0875	47.714285714285715	9.2	80.5	5	NA	NA
Kin	19	161	1.11.2	3	50	108	75	5.942	2.895	12.667	NA	26.301	2.423728813559322	8.428571428571429	20.428571428571427	2.4195804195804196	49.42857142857143	9.1	76.8	5	NA	NA
Kin	19	174	1.10.2	3	51	103	67.5	6.206	2.878	12.897	NA	28.409	2.3783783783783785	7.928571428571429	18.857142857142858	2.6666666666666665	50.285714285714285	10	126.5	0	NA	NA
Kin	19	158	1.9.2	3	52	104	85	6.444	3.127	14.774	NA	34.459	2.1094527363184077	10.05	21.2	2.792452830188679	59.2	10.2	121.2	5	NA	NA
Kin	19	188	1.8.2	3	53	102	107.5	5.973	3.161	13.939	NA	34.653	2.2661596958174903	9.392857142857142	21.285714285714285	2.033557046979866	43.285714285714285	10.5	125.8	15	NA	NA
Kin	19	191	1.7.2	3	54	103	100	5.94	3.11	13.868	NA	32.051	2.5210084033613445	8.5	21.428571428571427	2.08	44.57142857142857	10	135	30	NA	NA
Kin	19	LA	1.6.2	3	55	103	95	6.426	3.189	15.192	NA	36.364	2.2297872340425533	8.392857142857142	18.714285714285715	2.099236641221374	39.285714285714285	10	153.7	0	NA	NA
Kin	19	184	1.5.2	3	56	103	95	6.11	3.238	14.398	NA	34.364	2.6345381526104417	8.892857142857142	23.428571428571427	1.774390243902439	41.57142857142857	10	131.8	0	NA	NA
Kin	19	201	1.4.2	3	57	101	77.5	6.014	3.114	13.981	NA	32.66	2.2650602409638556	8.892857142857142	20.142857142857142	2.106382978723404	42.42857142857143	9.7	122.7	0	NA	NA
Kin	19	178	1.3.2	3	58	101	95	6.548	3.03	14.491	NA	36.525	2.32156862745098	9.107142857142858	21.142857142857142	1.9054054054054055	40.285714285714285	10.3	150.8	0	NA	NA
Kin	19	200	1.2.2	3	59	105	77.5	6.084	2.759	12.621	NA	26.757	2.423728813559322	8.428571428571429	20.428571428571427	2.5874125874125875	52.857142857142854	9.9	76.3	0	NA	NA
Kin	19	MPV	1.1.2	3	60	105	92.5	5.945	2.934	12.857	NA	28.451	2.5488372093023255	8.958333333333334	22.833333333333332	2.591240875912409	59.166666666666664	10.1	113.1	5	NA	NA
Kin	19	241	3.20.1	4	1	106	110	6.042	3.21	14.188	NA	36.393	2.3305785123966944	8.642857142857142	20.142857142857142	2.1631205673758864	43.57142857142857	11.1	221.9	0	NA	NA
Kin	19	288	3.19.1	4	2	108	95	5.986	3.19	13.946	NA	35.161	2.108843537414966	10.5	22.142857142857142	2	44.285714285714285	10.9	173.3	5	NA	NA
Kin	19	282	3.18.1	4	3	101	100	6.594	3.147	15.143	NA	37.762	2.1645021645021645	8.25	17.857142857142858	2.288	40.857142857142854	10.8	232.6	0	NA	NA
Kin	19	242	3.17.1	4	4	99	95	6.383	3.044	14.18	NA	31.595	2.0769230769230766	9.285714285714286	19.285714285714285	2.414814814814815	46.57142857142857	10.3	122.4	5	NA	NA
Kin	19	281	3.16.1	4	5	100	95	6.169	3.047	13.691	NA	33.531	2.2393822393822393	9.25	20.714285714285715	2.3241379310344827	48.142857142857146	11.3	230.7	5	NA	NA
Kin	19	268	3.15.1	4	6	106	87.5	6.037	3.004	13.308	NA	30.267	2.3333333333333335	9	21	2.292517006802721	48.142857142857146	10.2	157.3	0	NA	NA
Kin	19	221	3.14.1	4	7	104	95	5.678	2.809	11.797	NA	25.253	2.271604938271605	8.678571428571429	19.714285714285715	2.869565217391304	56.57142857142857	10	125.8	30	NA	NA
Kin	19	276	3.13.1	4	8	104	97.5	5.543	3.063	12.51	NA	30.199	2.6280193236714973	7.392857142857143	19.428571428571427	2.5808823529411766	50.142857142857146	10.6	188.7	10	NA	NA
Kin	19	258	3.12.1	4	9	103	95	6.349	3	14.418	NA	31.366	2.1762452107279695	9.321428571428571	20.285714285714285	2.267605633802817	46	10.1	195.3	0	NA	NA
Kin	19	261	3.11.1	4	10	99	102.5	5.812	3.203	13.781	NA	34.783	2.073469387755102	8.75	18.142857142857142	2.5354330708661417	46	11.2	132.1	15	NA	NA
Kin	19	275	3.10.1	4	11	104	97.5	5.873	2.893	12.243	NA	29.508	2.411764705882353	9.714285714285714	23.428571428571427	2.231707317073171	52.285714285714285	10.8	146.8	15	NA	NA
Kin	19	243	3.9.1	4	12	103	80	5.865	2.962	12.676	NA	30.618	2.2698412698412698	9	20.428571428571427	2.4895104895104896	50.857142857142854	10.9	157.9	15	NA	NA
Kin	19	246	3.8.1	4	13	104	100	5.588	2.882	11.801	NA	26.718	2.6101694915254234	8.428571428571429	22	2.551948051948052	56.142857142857146	10.5	160.9	10	NA	NA
Kin	19	280	3.7.1	4	14	100	77.5	6.112	2.732	12.065	NA	26.099	2.1526104417670684	8.892857142857142	19.142857142857142	2.716417910447761	52	9.5	149.1	40	NA	NA
Kin	19	LA	3.6.1	4	15	104	100	NA	NA	NA	NA	NA	NA	9.357142857142858	19.857142857142858	NA	NA	NA	196.7	0	NA	NA
Kin	19	287	3.5.1	4	16	103	95	6.049	3.117	13.823	NA	32.923	2.444444444444444	8.357142857142858	20.428571428571427	2.272727272727273	46.42857142857143	10.7	175.6	10	NA	NA
Kin	19	230	3.4.1	4	17	103	75	6.016	2.823	12.509	NA	25.799	2.2063492063492065	9	19.857142857142858	2.9280575539568345	58.142857142857146	10.5	171.4	5	NA	NA
Kin	19	228	3.3.1	4	18	103	100	6.038	3.163	13.983	NA	33.333	2.4382470119521913	8.964285714285714	21.857142857142858	2.196078431372549	48	11.2	137.5	30	NA	NA
Kin	19	277	3.2.1	4	19	108	87.5	6.391	2.971	13.962	NA	29.721	2.1273408239700373	9.535714285714286	20.285714285714285	2.2746478873239435	46.142857142857146	9.6	103.9	40	NA	NA
Kin	19	117	2.20.1	4	21	105	80	6.092	2.837	12.848	NA	27.577	2.5283018867924527	7.571428571428571	19.142857142857142	2.6791044776119404	51.285714285714285	9.9	145.4	0	NA	NA
Kin	19	140	2.19.1	4	22	104	100	6.348	3.063	14.333	NA	33.939	2.3333333333333335	9.428571428571429	22	2.142857142857143	47.142857142857146	11.2	147.2	0	NA	NA
Kin	19	80	2.18.1	4	23	104	77.5	6.314	2.986	13.93	NA	30.205	2.2834645669291342	9.071428571428571	20.714285714285715	2.3517241379310345	48.714285714285715	10.3	122.3	0	NA	NA
Kin	19	118	2.17.1	4	24	105	102.5	6.146	2.918	13.016	NA	27.624	2.110545347206848	9.679285714285715	20.428571428571427	2.5314685314685317	51.714285714285715	10	111.2	10	NA	NA
Kin	19	130	2.16.1	4	25	103	75	6.005	2.813	12.313	NA	28.165	2.2706766917293235	9.5	21.571428571428573	2.562913907284768	55.285714285714285	10.9	123.9	20	NA	NA
Kin	19	84	2.15.1	4	26	103	87.5	6.047	3.055	13.474	NA	34.431	2.4	8.928571428571429	21.428571428571427	2.2266666666666666	47.714285714285715	11.5	204.4	5	NA	NA
Kin	19	75	2.14.1	4	27	104	85	6.158	2.947	13.63	NA	28.818	2.310077519379845	9.214285714285714	21.285714285714285	2.3288590604026846	49.57142857142857	10	127.8	10	NA	NA
Kin	19	134	2.13.1	4	28	103	100	5.749	2.982	12.578	NA	28.954	2.2495201535508635	9.303571428571429	20.928571428571427	2.546075085324232	53.285714285714285	10.8	144.2	0	NA	NA
Kin	19	125	2.12.1	4	29	103	72.5	5.445	2.735	11.013	NA	22.717	2.1872659176029963	9.535714285714286	20.857142857142858	2.9246575342465753	61	9.7	102.1	30	NA	NA
Kin	19	78	2.11.1	4	30	107	100	6.079	3.077	13.64	NA	32.203	2.2857142857142856	9.75	22.285714285714285	2.269230769230769	50.57142857142857	11.4	113.4	5	NA	NA
Kin	19	128	2.10.1	4	31	104	100	5.758	3.054	12.828	NA	31.503	2.126760563380282	10.142857142857142	21.571428571428573	2.2913907284768213	49.42857142857143	10.9	126.1	30	NA	NA
Kin	19	90	2.9.1	4	32	105	85	5.758	2.862	12.026	NA	26.098	2.2794117647058827	9.714285714285714	22.142857142857142	2.496774193548387	55.285714285714285	10.1	100.1	40	NA	NA
Kin	19	126	2.8.1	4	33	107	85	6.042	2.842	12.696	NA	27.5	2.183150183150183	9.75	21.285714285714285	2.4161073825503356	51.42857142857143	9.9	134.6	0	NA	NA
Kin	19	88	2.7.1	4	34	111	70	6.225	3.024	13.781	NA	32.132	2.3209876543209877	8.678571428571429	20.142857142857142	2.3617021276595747	47.57142857142857	10.7	73.2	0	NA	NA
Kin	19	MPV	2.6.1	4	35	106	67.5	5.909	2.923	12.562	NA	28.022	2.3636363636363633	9.428571428571429	22.285714285714285	2.3333333333333335	52	10.2	141.7	10	NA	NA
Kin	19	76	2.5.1	4	36	109	85	5.935	3.007	13.079	NA	31.073	2.3043478260869565	9.857142857142858	22.714285714285715	2.2264150943396226	50.57142857142857	11	106.6	0	NA	NA
Kin	19	85	2.4.1	4	37	107	100	5.829	3.05	13.135	NA	30.312	2.251968503937008	9.071428571428571	20.428571428571427	2.4685314685314683	50.42857142857143	10.7	145.4	5	NA	NA
Kin	19	74	2.3.1	4	38	106	107.5	6.137	2.92	13.443	NA	29.851	2.071197411003236	11.035714285714286	22.857142857142858	2.09375	47.857142857142854	10	127.8	0	NA	NA
Kin	19	133	2.2.1	4	39	106	110	6.069	3.084	14.03	NA	29.524	2.167487684729064	10.15	22	2.8636363636363638	63	9.3	122.8	0	NA	NA
Kin	19	211	1.20.1	4	41	104	90	5.693	2.969	12.39	NA	29.915	2.5205479452054798	7.821428571428571	19.714285714285715	2.5434782608695654	50.142857142857146	10.5	170.2	30	NA	NA
Kin	19	176	1.19.1	4	42	108	82.5	5.714	2.865	12.117	NA	25.789	2.419753086419753	8.678571428571429	21	2.5850340136054424	54.285714285714285	9.8	95.1	20	NA	NA
Kin	19	160	1.18.1	4	43	102	82.5	5.794	2.995	12.669	NA	30.383	2.2971887550200805	8.892857142857142	20.428571428571427	2.370629370629371	48.42857142857143	10.3	137.8	10	NA	NA
Kin	19	159	1.17.1	4	44	106	80	6.268	2.825	13.137	NA	26.571	2.10989010989011	9.75	20.571428571428573	2.4305555555555554	50	9.3	87.1	25	NA	NA
Kin	19	193	1.16.1	4	45	102	85	5.986	2.943	12.91	NA	27.616	2.304526748971193	8.678571428571429	20	2.4571428571428573	49.142857142857146	9.5	135.8	15	NA	NA
Kin	19	154	1.15.1	4	46	104	105	6.454	3.184	14.844	NA	37.681	2.1398865784499055	9.446428571428571	20.214285714285715	1.9505300353356891	39.42857142857143	10.4	140.7	25	NA	NA
Kin	19	182	1.14.1	4	47	108	105	6.479	3.224	15.202	NA	37.918	2.3603603603603602	9.25	21.833333333333332	2.053435114503817	44.833333333333336	10.2	193	0	NA	NA
Kin	19	157	1.13.1	4	48	104	105	6.34	3.113	14.463	NA	35.354	2.2741935483870965	8.857142857142858	20.142857142857142	2.106382978723404	42.42857142857143	10.5	186.4	0	NA	NA
Kin	19	147	1.12.1	4	49	109	90	5.868	2.97	12.712	NA	26.836	2.9	7.142857142857143	20.714285714285715	2.4413793103448276	50.57142857142857	9.5	100	10	NA	NA
Kin	19	173	1.11.1	4	50	106	102.5	5.598	3.15	13.028	NA	30.769	2.2556390977443606	9.5	21.428571428571427	2.1666666666666665	46.42857142857143	10	185.7	NA	NA	NA
Kin	19	MPV	1.10.1	4	51	106	85	5.821	2.932	12.478	NA	26.563	2.5119999999999996	8.928571428571429	22.428571428571427	2.445859872611465	54.857142857142854	10.2	119.8	15	NA	NA
Kin	19	175	1.9.1	4	52	103	92.5	6.25	3.096	14.096	NA	32.673	2.403508771929825	8.142857142857142	19.571428571428573	2.2116788321167884	43.285714285714285	9.9	140.9	0	NA	NA
Kin	19	194	1.8.1	4	53	100	92.5	6.37	3.066	14.396	NA	35.172	2.434782608695652	9.035714285714286	22	1.8831168831168832	41.42857142857143	10.2	115.8	0	NA	NA
Kin	19	216	1.7.1	4	54	106	82.5	5.909	2.895	12.593	NA	25.459	2.6469344608879495	8.446428571428571	22.357142857142858	2.4345047923322682	54.42857142857143	9.7	91.3	20	NA	NA
Kin	19	180	1.6.1	4	55	102	95	5.664	3.098	13.008	NA	32.229	2.5090909090909093	7.857142857142857	19.714285714285715	2.4057971014492754	47.42857142857143	10.7	152.5	5	NA	NA
Kin	19	202	1.5.1	4	56	104	112.5	6.442	3.174	15.215	NA	37.455	2.479338842975207	8.642857142857142	21.428571428571427	1.8333333333333333	39.285714285714285	10.3	187.5	0	NA	NA
Kin	19	168	1.4.1	4	57	102	95	5.892	3.058	13.369	NA	32.759	2.3744292237442925	7.821428571428571	18.571428571428573	2.6769230769230767	49.714285714285715	11.4	135	0	NA	NA
Kin	19	197	1.3.1	4	58	106	102.5	6.577	3.087	14.87	NA	33.681	2.1991341991341993	8.25	18.142857142857142	2.267716535433071	41.142857142857146	9.7	114.7	0	NA	NA
Kin	19	203	1.2.1	4	59	104	102.5	5.85	3.054	13.219	NA	32.704	2.1451612903225805	10.333333333333334	22.166666666666668	2.3909774436090228	53	10.4	105.6	5	NA	NA
Kin	19	10	4.2.1	5	2	102	95	5.465	2.928	11.854	NA	26.339	2.2274509803921565	9.107142857142858	20.285714285714285	3.1549295774647885	64	11.8	96.1	15	NA	NA
Kin	19	33	4.3.1	5	3	102	97.5	6.264	3.187	14.814	NA	35.922	2.147058823529412	9.714285714285714	20.857142857142858	2.1164383561643834	44.142857142857146	11.1	155.8	5	NA	NA
Kin	19	MPV	4.4.1	5	4	105	95	5.985	3.047	13.229	NA	29.679	2.4326530612244897	8.75	21.285714285714285	2.51006711409396	53.42857142857143	11.1	165.1	10	NA	NA
Kin	19	12	4.5.1	5	5	105	85	6.106	2.986	13.498	NA	29.076	2.386266094420601	8.321428571428571	19.857142857142858	2.647482014388489	52.57142857142857	10.7	149.5	0	NA	NA
Kin	19	LA	4.6.1	5	6	104	100	6.314	3.096	14.319	NA	33.333	2.211382113821138	8.785714285714286	19.428571428571427	2.2720588235294117	44.142857142857146	10.3	204.5	0	NA	NA
Kin	19	54	4.7.1	5	7	105	92.5	6.718	3.004	14.93	NA	33.333	2.3593750000000004	9.142857142857142	21.571428571428573	1.9271523178807948	41.57142857142857	9.7	232.9	0	NA	NA
Kin	19	19	4.8.1	5	8	101	85	6.099	3	13.543	NA	31.487	2.468085106382979	8.392857142857142	20.714285714285715	2.3655172413793104	49	10.8	185.1	0	NA	NA
Kin	19	3	4.9.1	5	9	108	92.5	6.188	2.998	13.676	NA	26.26	2.1660649819494586	9.892857142857142	21.428571428571427	2.513333333333333	53.857142857142854	9.9	145.5	5	NA	NA
Kin	19	44	4.10.1	5	10	103	105	5.893	3.143	13.742	NA	30.294	2.3148936170212764	8.392857142857142	19.428571428571427	2.5	48.57142857142857	10.3	146.3	0	NA	NA
Kin	19	34	4.11.1	5	11	103	105	6.423	3.058	14.276	NA	32.803	2.3426294820717133	8.964285714285714	21	2.1360544217687076	44.857142857142854	10.3	197.5	0	NA	NA
Kin	19	42	4.12.1	5	12	106	82.5	6.284	2.777	12.83	NA	28.261	2.453333333333333	8.035714285714286	19.714285714285715	2.6666666666666665	52.57142857142857	10.4	194.9	5	NA	NA
Kin	19	20	4.13.1	5	13	106	92.5	5.91	2.956	12.881	NA	25.824	2.2014388489208634	9.928571428571429	21.857142857142858	2.3790849673202614	52	9.4	149.5	60	NA	NA
Kin	19	14	4.14.1	5	14	106	87.5	6.264	2.864	13.299	NA	25	2.252707581227437	9.892857142857142	22.285714285714285	2.358974358974359	52.57142857142857	9.2	155.2	5	NA	NA
Kin	19	30	4.15.1	5	15	103	85	6.465	3.042	14.139	NA	34.202	2.2	8.571428571428571	18.857142857142858	2.3257575757575757	43.857142857142854	10.5	213.3	0	NA	NA
Kin	19	40	4.16.1	5	16	104	87.5	6.02	3.054	13.565	NA	30.699	2.090909090909091	9.428571428571429	19.714285714285715	2.3840579710144927	47	10.1	245.9	0	NA	NA
Kin	19	15	4.17.1	5	17	107	80	5.698	2.738	11.5	NA	23.94	2.614678899082569	7.785714285714286	20.357142857142858	2.814035087719298	57.285714285714285	9.6	128.2	0	NA	NA
Kin	19	48	4.18.1	5	18	103	110	6.298	3.355	15.565	NA	38.722	2.3442622950819674	8.714285714285714	20.428571428571427	1.8601398601398602	38	10.3	229	0	NA	NA
Kin	19	70	4.19.1	5	19	108	87.5	6.096	2.945	13.136	NA	27.586	2.0481099656357387	10.392857142857142	21.285714285714285	2.140939597315436	45.57142857142857	8.8	145.3	40	NA	NA
Kin	19	62	4.20.1	5	20	105	100	6.239	2.945	13.467	NA	30.411	2.0689655172413794	9.321428571428571	19.285714285714285	2.7037037037037037	52.142857142857146	11.1	107.5	15	NA	NA
Kin	19	349	5.2.1	5	22	104	97.5	6.106	3.298	14.847	NA	36.842	2.355140186915888	8.916666666666666	21	2.4126984126984126	50.666666666666664	11.2	180.5	5	NA	NA
Kin	19	337	5.3.1	5	23	101	100	6.088	3.024	13.608	NA	32.394	2.3412698412698414	9	21.071428571428573	2.406779661016949	50.714285714285715	11.5	182.8	0	NA	NA
Kin	19	LA	5.4.1	5	24	103	95	6.41	3.019	14.069	NA	31.438	2.0447761194029854	9.571428571428571	19.571428571428573	2.1824817518248176	42.714285714285715	9.4	113.6	0	NA	NA
Kin	19	304	5.5.1	5	25	107	82.5	5.86	2.86	12.514	NA	24.282	2.2988505747126435	9.321428571428571	21.428571428571427	2.5533333333333332	54.714285714285715	9.3	103.1	5	NA	NA
Kin	19	299	5.6.1	5	26	104	85	6.269	2.922	13.465	NA	29.248	1.9035369774919613	11.107142857142858	21.142857142857142	2.425675675675676	51.285714285714285	10.5	231	0	NA	NA
Kin	19	291	5.7.1	5	27	104	95	6.075	3.06	13.532	NA	31.661	2.634920634920635	9	23.714285714285715	1.9216867469879517	45.57142857142857	10.1	154.7	0	NA	NA
Kin	19	326	5.8.1	5	28	105	112.5	6.279	3.124	14.33	NA	34.333	2.0319488817891376	11.178571428571429	22.714285714285715	1.8867924528301887	42.857142857142854	10.3	191.2	0	NA	NA
Kin	19	305	5.9.1	5	29	106	77.5	5.967	2.817	12.227	NA	26.225	2.0563380281690145	10.142857142857142	20.857142857142858	2.3767123287671232	49.57142857142857	9.1	117.9	20	NA	NA
Kin	19	330	5.10.1	5	30	107	85	6.328	2.975	13.988	NA	31.198	2.287769784172662	9.928571428571429	22.714285714285715	2.257861635220126	51.285714285714285	11.2	109.1	0	NA	NA
Kin	19	294	5.11.1	5	31	103	92.5	5.943	2.952	13.014	NA	31.081	2.0740740740740744	9.642857142857142	20	2.642857142857143	52.857142857142854	11.5	152.5	0	NA	NA
Kin	19	316	5.12.1	5	32	105	97.5	5.852	2.882	12.579	NA	26.328	2.217821782178218	10.821428571428571	24	2.5773809523809526	61.857142857142854	11.4	103.2	0	NA	NA
Kin	19	289	5.13.1	5	33	103	65	6.161	2.958	13.412	NA	27.614	2.2184873949579833	8.5	18.857142857142858	2.8257575757575757	53.285714285714285	10.3	139.8	0	NA	NA
Kin	19	341	5.14.1	5	34	105	95	6.14	3.034	13.753	NA	30.685	2.3492063492063493	9	21.142857142857142	2.4662162162162162	52.142857142857146	11.2	151.8	15	NA	NA
Kin	19	340	5.15.1	5	35	103	77.5	6.202	2.997	13.732	NA	30.925	2.1363636363636362	9.428571428571429	20.142857142857142	2.4539007092198584	49.42857142857143	10.7	159.5	0	NA	NA
Kin	19	LA	5.16.1	5	36	104	95	6.452	3.197	14.988	NA	36.301	2.1214574898785425	8.821428571428571	18.714285714285715	2.2290076335877864	41.714285714285715	10.6	131.5	0	NA	NA
Kin	19	350	5.17.1	5	37	105	95	5.825	2.957	12.754	NA	24.306	2.3709677419354835	8.857142857142858	21	2.938775510204082	61.714285714285715	10.5	118.4	0	NA	NA
Kin	19	307	5.18.1	5	38	104	70	6.192	2.969	13.498	NA	30.303	2.588235294117647	8.5	22	2.5	55	10	120.7	15	NA	NA
Kin	19	352	5.19.1	5	39	107	70	5.701	2.88	12.122	NA	22.432	2.336	8.928571428571429	20.857142857142858	2.5342465753424657	52.857142857142854	8.3	95.5	15	NA	NA
Kin	19	315	5.20.1	5	40	109	70	6.226	2.728	12.607	NA	25.282	2.4687500000000004	9.142857142857142	22.571428571428573	2.8037974683544302	63.285714285714285	11.2	159.5	0	NA	NA
Kin	19	72	6.2.1	5	42	107	95	6.644	2.961	14.482	NA	33.449	2.2074074074074073	9.642857142857142	21.285714285714285	1.9261744966442953	41	9.6	191.3	0	NA	NA
Kin	19	53	6.3.1	5	43	103	97.5	5.872	3.122	13.453	NA	33.91	1.977358490566038	9.464285714285714	18.714285714285715	2.2061068702290076	41.285714285714285	9.8	212.9	5	NA	NA
Kin	19	20	6.4.1	5	44	107	85	5.905	2.993	12.905	NA	27.405	2.313253012048193	8.892857142857142	20.571428571428573	2.3819444444444446	49	9.4	128.7	55	NA	NA
Kin	19	41	6.5.1	5	45	104	87.5	5.721	2.952	12.422	NA	29.62	2.49789029535865	8.464285714285714	21.142857142857142	2.4864864864864864	52.57142857142857	10.9	155.2	0	NA	NA
Kin	19	45	6.6.1	5	46	108	75	5.905	2.856	12.477	NA	25.51	2.7942583732057416	7.464285714285714	20.857142857142858	2.684931506849315	56	10	62.9	20	NA	NA
Kin	19	21	6.7.1	5	47	103	77.5	5.718	2.969	12.489	NA	25.197	2.416666666666667	8.571428571428571	20.714285714285715	2.627586206896552	54.42857142857143	9.6	96.8	5	NA	NA
Kin	19	50	6.8.1	5	48	105	77.5	6.547	2.925	14.127	NA	32.509	2.1832669322709166	8.964285714285714	19.571428571428573	2.065693430656934	40.42857142857143	9.2	107.3	10	NA	NA
Kin	19	27	6.9.1	5	49	103	100	6.233	3.153	14.337	NA	35.361	1.9534883720930234	9.214285714285714	18	2.0873015873015874	37.57142857142857	9.3	181.3	5	NA	NA
Kin	19	37	6.10.1	5	50	109	77.5	5.972	2.848	12.615	NA	26.558	2.349442379182156	9.607142857142858	22.571428571428573	2.3354430379746836	52.714285714285715	9.8	129.9	0	NA	NA
Kin	19	36	6.11.1	5	51	101	97.5	6.263	3.05	14.032	NA	33.013	2.1992031872509963	8.964285714285714	19.714285714285715	2.260869565217391	44.57142857142857	10.3	105.3	0	NA	NA
Kin	19	47	6.12.1	5	52	103	97.5	6.08	3.144	13.912	NA	35.331	2.6943005181347153	6.892857142857143	18.571428571428573	2.4384615384615387	45.285714285714285	11.2	170.3	0	NA	NA
Kin	19	LA	6.13.1	5	53	105	95	6.384	3.187	14.939	NA	34.7	2.361233480176211	8.107142857142858	19.142857142857142	2.3656716417910446	45.285714285714285	11	164.5	0	NA	NA
Kin	19	43	6.14.1	5	54	104	90	6.004	3.087	13.719	NA	32.738	2.358078602620087	8.178571428571429	19.285714285714285	2.488888888888889	48	11	155.7	40	NA	NA
Kin	19	1	6.15.1	5	55	104	80	5.988	3.023	13.207	NA	29.412	2.4242424242424243	8.25	20	2.307142857142857	46.142857142857146	9.5	134.1	25	NA	NA
Kin	19	8	6.16.1	5	56	105	92.5	6.131	3.028	13.441	NA	28.989	2.068493150684932	10.428571428571429	21.571428571428573	2.4900662251655628	53.714285714285715	10.9	135.4	10	NA	NA
Kin	19	46	6.17.1	5	57	106	102.5	6.523	3.209	15.365	NA	34.448	2.1846153846153844	9.285714285714286	20.285714285714285	2.1056338028169015	42.714285714285715	10.3	138.2	0	NA	NA
Kin	19	13	6.18.1	5	58	105	107.5	6.173	3.088	14.151	NA	32.853	2.0571428571428574	10	20.571428571428573	2.4097222222222223	49.57142857142857	11.4	158.1	0	NA	NA
Kin	19	17	6.19.1	5	59	104	112.5	6.079	3.088	13.728	NA	31.132	2.6046511627906974	7.678571428571429	20	2.2714285714285714	45.42857142857143	9.9	149.8	0	NA	NA
Kin	19	56	6.20.1	5	60	102	102.5	6.152	2.979	13.605	NA	33.333	2.4271844660194173	8.583333333333334	20.833333333333332	2.88	60	12	228.8	5	NA	NA
Kin	19	214	7.2.1	5	62	103	112.5	5.895	3.058	13.38	NA	31.044	2.213740458015267	9.357142857142858	20.714285714285715	2.510344827586207	52	11.3	185.2	35	NA	NA
Kin	19	159	7.3.1	5	63	104	92.5	6.167	2.817	12.853	NA	26.111	2.1999999999999997	9.285714285714286	20.428571428571427	2.5174825174825175	51.42857142857143	9.4	116.9	10	NA	NA
Kin	19	145	7.4.1	5	64	102	90	5.757	2.811	11.992	NA	26.087	2.0895522388059704	9.571428571428571	20	2.9571428571428573	59.142857142857146	10.8	155.1	5	NA	NA
Kin	19	205	7.5.1	5	65	103	120	5.527	2.912	11.856	NA	27.147	2.2453531598513012	9.607142857142858	21.571428571428573	2.390728476821192	51.57142857142857	9.8	147.6	5	NA	NA
Kin	19	156	7.6.1	5	66	103	110	6.11	3.019	13.308	NA	31.436	2.3293172690763053	8.892857142857142	20.714285714285715	2.5448275862068965	52.714285714285715	11.6	180.5	20	NA	NA
Kin	19	153	7.7.1	5	67	104	112.5	5.96	2.945	12.708	NA	30.725	2.413223140495868	8.642857142857142	20.857142857142858	2.363013698630137	49.285714285714285	10.6	180.9	10	NA	NA
Kin	19	195	7.8.1	5	68	103	102.2	5.811	2.921	12.673	NA	29.412	2.5765765765765765	7.928571428571429	20.428571428571427	2.2587412587412588	46.142857142857146	9.5	190.5	0	NA	NA
Kin	19	155	7.9.1	5	69	102	95	5.565	2.909	11.818	NA	25.728	2.7705627705627704	8.25	22.857142857142858	2.575	58.857142857142854	10.6	176.5	5	NA	NA
Kin	19	146	7.10.1	5	70	103	95	6.066	2.74	12.305	NA	26.567	2.253968253968254	9	20.285714285714285	2.359154929577465	47.857142857142854	8.9	155.8	0	NA	NA
Kin	19	152	7.11.1	5	71	102	92.5	5.961	2.819	12.126	NA	25.661	2.585683297180043	8.232142857142858	21.285714285714285	2.5369127516778525	54	9.7	120.9	15	NA	NA
Kin	19	210	7.12.1	5	72	104	110	6.098	3.022	13.517	NA	32.424	1.9795221843003414	10.464285714285714	20.714285714285715	2.2758620689655173	47.142857142857146	10.7	189	5	NA	NA
Kin	19	167	7.13.1	5	73	102	82.5	6.179	2.881	13.261	NA	26.598	2.299595141700405	8.821428571428571	20.285714285714285	2.7535211267605635	55.857142857142854	10.4	155	0	NA	NA
Kin	19	199	7.14.1	5	74	106	115	5.991	2.912	12.792	NA	26.234	2.2794117647058827	9.714285714285714	22.142857142857142	2.4838709677419355	55	10.1	184.4	35	NA	NA
Kin	19	183	7.15.1	5	75	104	80	5.964	2.709	11.841	NA	24.869	2.387096774193548	8.857142857142858	21.142857142857142	2.581081081081081	54.57142857142857	9.5	104.4	5	NA	NA
Kin	19	LA	7.16.1	5	76	103	87.5	6.267	3.009	13.781	NA	30.499	2.1847389558232932	8.892857142857142	19.428571428571427	2.5073529411764706	48.714285714285715	10.4	110.6	0	NA	NA
Kin	19	206	7.17.1	5	77	103	67.5	6.038	2.718	11.916	NA	24.01	2.4413145539906105	7.607142857142857	18.571428571428573	3.1076923076923078	57.714285714285715	9.7	130.5	0	NA	NA
Kin	19	165	7.18.1	5	78	105	87.5	5.576	2.765	11.483	NA	22.222	2.4761904761904763	9	22.285714285714285	2.423076923076923	54	8.4	114.7	15	NA	NA
Kin	19	194	7.19.1	5	79	98	90	6.364	3.015	14.084	NA	27.628	2.52	8.333333333333334	21	2.642857142857143	55.5	9.2	160.8	0	NA	NA
Kin	19	157	7.20.1	5	80	101	110	6.241	3.05	13.979	NA	31.476	2.3930131004366815	8.178571428571429	19.571428571428573	2.6204379562043796	51.285714285714285	11.3	218	5	NA	NA
Kin	19	259	8.2.1	5	82	105	87.5	6.254	2.942	13.456	NA	29.83	2.1617647058823533	9.714285714285714	21	2.3945578231292517	50.285714285714285	10.5	170.7	10	NA	NA
Kin	19	274	8.4.1	5	84	103	120	6.18	3.167	14.489	NA	37.333	2.0498220640569396	10.035714285714286	20.571428571428573	2.0833333333333335	42.857142857142854	11.2	277.5	0	NA	NA
Kin	19	240	8.5.1	5	85	104	92.5	6.096	2.802	12.726	NA	25.381	2.257142857142857	10	22.571428571428573	2.4936708860759493	56.285714285714285	10	210.5	35	NA	NA
Kin	19	288	8.6.1	5	86	107	95	5.6	2.779	11.403	NA	24.265	2.2416107382550337	10.642857142857142	23.857142857142858	2.44311377245509	58.285714285714285	9.9	175.6	5	NA	NA
Kin	19	MPV	8.7.1	5	87	104	97.5	6.01	2.797	12.201	NA	25.728	2.3597122302158273	9.928571428571429	23.428571428571427	2.5121951219512195	58.857142857142854	10.6	203.7	15	NA	NA
Kin	19	269	8.8.1	5	88	107	127.5	5.935	3.018	12.998	NA	28.297	2.238655462184874	10.625	23.785714285714285	2.186186186186186	52	10.3	174.2	15	NA	NA
Kin	19	224	8.9.1	5	89	104	95	5.25	2.672	10.167	NA	19.323	3.343283582089552	7.178571428571429	24	2.988095238095238	71.71428571428571	9.7	88	15	NA	NA
Kin	19	221	8.10.1	5	90	103	85	5.63	2.729	11.215	NA	21.628	2.1561338289962824	9.607142857142858	20.714285714285715	2.9655172413793105	61.42857142857143	9.3	131.9	20	NA	NA
Kin	19	227	8.11.1	5	91	107	107.5	6.364	2.837	13.389	NA	25.588	2.1875	9.142857142857142	20	2.4285714285714284	48.57142857142857	8.7	175.2	0	NA	NA
Kin	19	232	8.12.1	5	92	102	107.5	6.082	2.917	12.975	NA	31.092	2.1224489795918364	9.625	20.428571428571427	2.4965034965034967	51	11.1	163.7	15	NA	NA
Kin	19	253	8.13.1	5	93	97	115	6.178	3.088	13.835	NA	35.032	2.073529411764706	9.714285714285714	20.142857142857142	2.226950354609929	44.857142857142854	11	171.3	5	NA	NA
Kin	19	250	8.14.1	5	94	101	120	5.953	3.001	13.114	NA	31.627	2.273062730627306	9.678571428571429	22	2.155844155844156	47.42857142857143	10.5	214.2	10	NA	NA
Kin	19	265	8.15.1	5	95	101	80	6.262	2.778	12.736	NA	25.556	2.4510638297872345	8.392857142857142	20.571428571428573	2.5	51.42857142857143	9.2	139.3	5	NA	NA
Kin	19	222	8.16.1	5	96	108	135	5.923	2.94	12.826	NA	29.282	1.9875	11.428571428571429	22.714285714285715	2.2767295597484276	51.714285714285715	10.6	206.5	5	NA	NA
Kin	19	252	8.17.1	5	97	104	85	5.845	2.72	11.759	NA	18.905	2.4242424242424243	10.017857142857142	24.285714285714285	2.364705882352941	57.42857142857143	7.6	114.5	30	NA	NA
Kin	19	276	8.19.1	5	99	103	107.5	5.557	2.947	11.906	NA	27.762	2.761904761904762	7.5	20.714285714285715	2.43448275862069	50.42857142857143	9.8	146	35	NA	NA
Kin	19	262	8.20.1	5	100	104	122.5	5.973	2.839	12.468	NA	28.926	2.202090592334495	10.25	22.571428571428573	2.2974683544303796	51.857142857142854	10.5	221.6	0	NA	NA
Kin	19	348	9.2.1	5	102	100	82.5	6.282	3.011	13.797	NA	30.625	2.007782101167315	9.178571428571429	18.428571428571427	2.4806201550387597	45.714285714285715	9.8	176.6	0	NA	NA
Kin	19	303	9.3.1	5	103	106	107.5	6.041	3.144	13.904	NA	30.982	2.200743494423792	9.607142857142858	21.142857142857142	2.2027027027027026	46.57142857142857	10.1	234.4	25	NA	NA
Kin	19	356	9.4.1	5	104	104	107.5	6.722	3.085	15.096	NA	36.177	2.095238095238095	9.75	20.428571428571427	2.0489510489510487	41.857142857142854	10.6	306.3	0	NA	NA
Kin	19	322	9.5.1	5	105	100	100	5.925	3.024	13.366	NA	29.38	2.304526748971193	8.678571428571429	20	2.65	53	10.9	224.4	30	NA	NA
Kin	19	298	9.6.1	5	106	106	112.5	6.071	3.076	13.825	NA	30.523	2.217391304347826	9.857142857142858	21.857142857142858	2.2483660130718954	49.142857142857146	10.5	222.1	20	NA	NA
Kin	19	310	9.7.1	5	107	105	120	6.389	3.242	15.308	NA	37.079	2.202090592334495	10.25	22.571428571428573	1.6898734177215189	38.142857142857146	9.9	272.5	10	NA	NA
Kin	19	325	9.8.1	5	108	97	97.5	6.147	3.031	14.052	NA	32.239	2.0307692307692307	9.285714285714286	18.857142857142858	2.537878787878788	47.857142857142854	10.8	298.8	0	NA	NA
Kin	19	317	9.9.1	5	109	99	82.5	5.502	2.75	11.279	NA	21.642	2.064981949458484	9.892857142857142	20.428571428571427	2.8111888111888113	57.42857142857143	8.7	141.4	15	NA	NA
Kin	19	LA	9.10.1	5	110	102	100	6.34	3.195	15.005	NA	35	2.0520446096654275	9.607142857142858	19.714285714285715	2.1739130434782608	42.857142857142854	10.5	298.8	0	NA	NA
Kin	19	358	9.11.1	5	111	104	112.5	6.074	3.275	14.739	NA	35.548	2.5485232067510553	8.464285714285714	21.571428571428573	1.9933774834437086	43	10.7	327.3	0	NA	NA
Kin	19	293	9.12.1	5	112	100	100	6.156	2.985	13.457	NA	28.824	2.218978102189781	9.785714285714286	21.714285714285715	2.236842105263158	48.57142857142857	9.8	255.4	15	NA	NA
Kin	19	302	9.13.1	5	113	103	112.5	6.313	3.2	14.652	NA	35.88	2.360424028268551	10.107142857142858	23.857142857142858	1.8023952095808384	43	10.8	337.2	0	NA	NA
Kin	19	290	9.14.1	5	114	102	110	6.06	3.136	14	NA	32.831	2.414814814814815	9.642857142857142	23.285714285714285	2.03680981595092	47.42857142857143	10.9	264	40	NA	NA
Kin	19	306	9.15.1	5	115	102	77.5	6.367	2.864	13.207	NA	26.757	2.471111111111111	8.035714285714286	19.857142857142858	2.661870503597122	52.857142857142854	9.9	107.4	10	NA	NA
Kin	19	335	9.16.1	5	116	104	120	5.982	3.277	14.514	NA	35.192	1.9851851851851852	9.642857142857142	19.142857142857142	2.1417910447761193	41	10.1	275.8	30	NA	NA
Kin	19	297	9.17.1	5	117	104	105.5	6.636	3.038	14.745	NA	33.566	2.1134751773049647	10.071428571428571	21.285714285714285	1.919463087248322	40.857142857142854	9.6	186.6	0	NA	NA
Kin	19	300	9.18.1	5	118	102	125	6.416	3.173	15.007	NA	37.584	2.287719298245614	10.178571428571429	23.285714285714285	1.8282208588957056	42.57142857142857	11.2	271.2	35	NA	NA
Kin	19	MPV	9.19.1	5	119	104	105	6.127	3.042	13.506	NA	32.602	2.53125	9.142857142857142	23.142857142857142	1.9691358024691359	45.57142857142857	10.4	273.5	15	NA	NA
Kin	19	341	9.20.1	5	120	103	117.5	6.039	2.964	13.172	NA	29.915	2.518518518518518	7.714285714285714	19.428571428571427	2.5808823529411766	50.142857142857146	10.5	293.4	30	NA	NA
Kin	19	141	10.2.1	5	122	101	125	6.656	3.252	16.117	NA	42.91	2.0869565217391304	10.678571428571429	22.285714285714285	1.7179487179487178	38.285714285714285	11.5	324.6	0	NA	NA
Kin	19	143	10.3.1	5	123	104	97.5	6.151	2.957	13.387	NA	31.09	2.456692913385827	9.071428571428571	22.285714285714285	2	44.57142857142857	9.7	277.7	0	NA	NA
Kin	19	101	10.4.1	5	124	100	92.5	6.219	3.021	13.842	NA	35.065	2.2344827586206897	10.357142857142858	23.142857142857142	1.9012345679012346	44	10.8	268.2	15	NA	NA
Kin	19	81	10.5.1	5	125	104	110	5.858	2.834	12.117	NA	25.781	2.3071672354948807	10.464285714285714	24.142857142857142	2.272189349112426	54.857142857142854	9.9	272.1	50	NA	NA
Kin	19	119	10.6.1	5	126	103	125	6.461	3.051	14.374	NA	34.277	2.107255520504732	11.321428571428571	23.857142857142858	1.904191616766467	45.42857142857143	10.9	253.2	5	NA	NA
Kin	19	92	10.7.1	5	127	103	97.5	NA	NA	NA	NA	NA	NA	8.357142857142858	22.142857142857142	NA	NA	NA	NA	5	NA	NA
Kin	19	121	10.8.1	5	128	102	80	5.758	2.782	12.005	NA	25	2.0719424460431655	9.928571428571429	20.571428571428573	2.638888888888889	54.285714285714285	9.5	176.4	0	NA	NA
Kin	19	77	10.9.1	5	129	101	102.5	5.77	3.01	12.821	NA	29.226	2.4214559386973185	9.321428571428571	22.571428571428573	2.2088607594936707	49.857142857142854	10.2	199.7	10	NA	NA
Kin	19	115	10.10.1	5	130	102	115	6.289	3.089	14.202	NA	36.478	2.2352941176470593	9.714285714285714	21.714285714285715	2.0921052631578947	45.42857142857143	11.6	284.7	15	NA	NA
Kin	19	91	10.11.1	5	131	100	92.5	6.292	3.004	14.129	NA	30.435	2.2406015037593985	9.5	21.285714285714285	2.161073825503356	46	9.8	178.4	30	NA	NA
Kin	19	88	10.12.1	5	132	108	80	6.379	2.948	13.698	NA	31.41	2.2857142857142856	8.75	20	2.6	52	9.8	162.8	0	NA	NA
Kin	19	83	10.13.1	5	133	104	85	6.252	2.834	12.803	NA	28.451	2.24390243902439	8.785714285714286	19.714285714285715	2.572463768115942	50.714285714285715	10.1	204.8	10	NA	NA
Kin	19	86	10.14.1	5	134	104	110	6.253	3.254	14.954	NA	36.393	2.42914979757085	8.821428571428571	21.428571428571427	2.033333333333333	43.57142857142857	11.1	276.3	5	NA	NA
Kin	19	96	10.15.1	5	135	107	115	6.074	3.213	14.446	NA	35.505	2.1806451612903226	11.071428571428571	24.142857142857142	1.816568047337278	43.857142857142854	10.9	259	15	NA	NA
Kin	19	79	10.16.1	5	136	103	105	6.044	3.067	13.578	NA	33.228	2.2857142857142856	10.25	23.428571428571427	1.9268292682926829	45.142857142857146	10.5	234.9	35	NA	NA
Kin	19	73	10.17.1	5	137	101	85	6.142	3.229	14.826	NA	36.111	2.594142259414226	8.535714285714286	22.142857142857142	1.8580645161290323	41.142857142857146	10.4	182.6	0	NA	NA
Kin	19	127	10.18.1	5	138	104	80	5.887	2.888	12.497	NA	25.07	2.2222222222222223	10.285714285714286	22.857142857142858	2.24375	51.285714285714285	9	169.4	20	NA	NA
Kin	19	76	10.19.1	5	139	105	97.5	6.105	2.891	12.984	NA	29.268	2.2317596566523603	9.708333333333334	21.666666666666668	2.523076923076923	54.666666666666664	9.6	225	0	NA	NA
Kin	19	112	10.20.1	5	140	104	112.5	6.13	3.109	13.926	NA	33.861	2.4280155642023344	9.178571428571429	22.285714285714285	2.0256410256410255	45.142857142857146	10.7	291.3	20	NA	NA
Kin	19	MPV	4.1.2	6	1	105	95	5.93	3.023	13.136	NA	26.41	2.4486692015209126	9.392857142857142	23	2.422360248447205	55.714285714285715	10.3	140.8	5	NA	NA
Kin	19	56	4.2.2	6	2	103	85	6.127	3.059	13.832	NA	34.012	2.2881355932203387	8.428571428571429	19.285714285714285	2.5481481481481483	49.142857142857146	11.7	125.8	5	NA	NA
Kin	19	9	4.3.2	6	3	105	85	5.956	2.736	12.155	NA	22.353	2.043887147335423	11.392857142857142	23.285714285714285	2.607361963190184	60.714285714285715	9.5	60	10	NA	NA
Kin	19	43	4.4.2	6	4	104	92.5	5.969	2.92	12.952	NA	26.525	2.1180555555555554	9.6	20.333333333333332	3.0901639344262297	62.833333333333336	10	106.9	35	NA	NA
Kin	19	24	4.5.2	6	5	104	105	6.099	3.033	13.502	NA	34.063	2.5357142857142856	8	20.285714285714285	2.2535211267605635	45.714285714285715	10.9	105.3	0	NA	NA
Kin	19	46	4.6.2	6	6	106	117.5	6.64	3.25	15.921	NA	35.314	2.1791044776119404	9.571428571428571	20.857142857142858	2.0753424657534247	43.285714285714285	10.7	138.5	0	NA	NA
Kin	19	2	4.7.2	6	7	104	90	6.172	3.046	13.759	NA	31.692	2.3718592964824126	8.291666666666666	19.666666666666668	2.7542372881355934	54.166666666666664	10.3	144.7	15	NA	NA
Kin	19	38	4.8.2	6	8	101	105	6.295	3.255	14.874	NA	39.716	2.285714285714286	7.75	17.714285714285715	2.274193548387097	40.285714285714285	11.2	131.2	15	NA	NA
Kin	19	55	4.9.2	6	9	98	105	5.719	3.099	13.03	NA	31.471	2.2857142857142856	8.25	18.857142857142858	2.5757575757575757	48.57142857142857	10.7	145.9	5	NA	NA
Kin	19	21	4.10.2	6	10	102	85	5.804	2.991	12.671	NA	26	2.3122362869198314	8.464285714285714	19.571428571428573	2.5547445255474455	50	9.1	100.2	5	NA	NA
Kin	19	7	4.11.2	6	11	101	90	6.507	2.975	14.367	NA	33.123	2.0636042402826855	10.107142857142858	20.857142857142858	2.171232876712329	45.285714285714285	10.5	97.3	15	NA	NA
Kin	19	13	4.12.2	6	12	104	120	6.128	3.048	13.863	NA	30.357	2.0938628158844765	9.892857142857142	20.714285714285715	2.317241379310345	48	10.2	101.4	0	NA	NA
Kin	19	41	4.13.2	6	13	104	95	5.75	2.938	12.546	NA	29.48	2.3308270676691727	9.5	22.142857142857142	2.232258064516129	49.42857142857143	10.2	109.7	0	NA	NA
Kin	19	45	4.14.2	6	14	107	85	6.08	2.885	12.809	NA	27.441	2.49789029535865	8.464285714285714	21.142857142857142	2.560810810810811	54.142857142857146	10.4	94.2	15	NA	NA
Kin	19	18	4.15.2	6	15	104	77.5	6.015	2.867	12.643	NA	24.679	2.425925925925926	7.714285714285714	18.714285714285715	2.969465648854962	55.57142857142857	9.6	54.9	40	NA	NA
Kin	19	4	4.16.2	6	16	103	72.5	6.188	3.022	13.66	NA	32.941	2.4072398190045248	7.892857142857143	19	2.556390977443609	48.57142857142857	11.2	117	5	NA	NA
Kin	19	47	4.17.2	6	17	102	97.5	6.16	3.166	14.104	NA	35.587	2.4444444444444446	7.714285714285714	18.857142857142858	2.128787878787879	40.142857142857146	10	160	0	NA	NA
Kin	19	37	4.18.2	6	18	107	87.5	5.985	2.821	12.715	NA	23.902	2.341818181818182	9.821428571428571	23	2.546583850931677	58.57142857142857	9.8	101.7	0	NA	NA
Kin	19	39	4.19.2	6	19	109	92.5	6.336	2.749	12.83	NA	25.558	2.2652329749103948	9.964285714285714	22.571428571428573	2.550632911392405	57.57142857142857	10.3	99.6	0	NA	NA
Kin	19	69	4.20.2	6	20	109	115	5.987	3.044	13.399	NA	31.832	2.292490118577075	9.035714285714286	20.714285714285715	2.296551724137931	47.57142857142857	10.6	156.2	0	NA	NA
Kin	19	LA	5.1.2	6	21	104	97.5	6.295	3.058	14.317	NA	31.884	2.0363636363636366	9.821428571428571	20	2.4642857142857144	49.285714285714285	11	130	0	NA	NA
Kin	19	336	5.2.2	6	22	107	107.5	6.418	3.022	14.037	NA	30.874	2.4322344322344325	9.75	23.714285714285715	2.2048192771084336	52.285714285714285	11.3	130.2	5	NA	NA
Kin	19	293	5.3.2	6	23	103	85	6.109	3.011	13.468	NA	26.703	2.0353356890459366	10.107142857142858	20.571428571428573	2.548611111111111	52.42857142857143	9.8	55.5	15	NA	NA
Kin	19	290	5.4.2	6	24	103	97.5	6.104	3.023	13.55	NA	31.044	2.3759398496240602	9.5	22.571428571428573	2.3037974683544302	52	11.3	166.7	10	NA	NA
Kin	19	308	5.5.2	6	25	104	85	5.697	2.77	11.882	NA	25.622	2.2857142857142856	9.25	21.142857142857142	2.7162162162162162	57.42857142857143	10.3	99.8	30	NA	NA
Kin	19	344	5.6.2	6	26	103	105	6.434	2.987	13.987	NA	30.214	2.3293172690763053	8.892857142857142	20.714285714285715	2.579310344827586	53.42857142857143	11.3	126.1	0	NA	NA
Kin	19	302	5.7.2	6	27	105	102.5	6.214	3.03	13.912	NA	30.793	2.00611620795107	11.678571428571429	23.428571428571427	2	46.857142857142854	10.1	168.8	0	NA	NA
Kin	19	342	5.8.2	6	28	106	82.5	6.107	2.909	13.172	NA	26.963	2	11.428571428571429	22.857142857142858	2.3875	54.57142857142857	10.3	99.6	5	NA	NA
Kin	19	318	5.9.2	6	29	104	97.5	5.917	3.053	13.232	NA	33.06	1.9424460431654675	9.928571428571429	19.285714285714285	2.7111111111111112	52.285714285714285	12.1	120.1	0	NA	NA
Kin	19	292	5.10.2	6	30	107	105	5.906	2.965	12.92	NA	30.959	2.1159420289855073	9.857142857142858	20.857142857142858	2.5	52.142857142857146	11.3	112.6	5	NA	NA
Kin	19	331	5.11.2	6	31	106	85	6.093	2.813	12.469	NA	25.743	2.141025641025641	11.142857142857142	23.857142857142858	2.4191616766467066	57.714285714285715	10.4	94.1	5	NA	NA
Kin	19	296	5.12.2	6	32	104	67.5	6.005	2.86	12.602	NA	24.828	2.2901960784313724	9.107142857142858	20.857142857142858	2.9794520547945207	62.142857142857146	10.8	54.4	15	NA	NA
Kin	19	329	5.13.2	6	33	111	90	5.888	3.079	13.263	NA	30.052	1.9319727891156462	10.5	20.285714285714285	2.7183098591549295	55.142857142857146	11.6	70.1	10	NA	NA
Kin	19	310	5.14.2	6	34	109	97.5	6.137	3.042	13.876	NA	29.765	2.1443298969072164	10.392857142857142	22.285714285714285	2.4551282051282053	54.714285714285715	11.4	84.3	5	NA	NA
Kin	19	312	5.15.2	6	35	104	72	6.16	3.072	14.046	NA	31.105	2.208955223880597	9.571428571428571	21.142857142857142	2.324324324324324	49.142857142857146	10.7	112.5	0	NA	NA
Kin	19	332	5.16.2	6	36	103	72.5	5.84	2.969	12.683	NA	28.726	2.317596566523605	8.321428571428571	19.285714285714285	2.7333333333333334	52.714285714285715	10.6	117.2	10	NA	NA
Kin	19	MPV	5.17.2	6	37	107	87.5	5.866	2.963	12.704	NA	26.824	2.3111111111111113	9.642857142857142	22.285714285714285	2.7243589743589745	60.714285714285715	11.4	107.2	15	NA	NA
Kin	19	314	5.18.2	6	38	105	97.5	6.263	3.13	14.558	NA	34.557	2.150375939849624	9.5	20.428571428571427	2.2867132867132867	46.714285714285715	11.3	110	0	NA	NA
Kin	19	319	5.19.2	6	39	100	72.5	5.89	2.884	12.601	NA	23.611	2.0579710144927534	9.857142857142858	20.285714285714285	3.0422535211267605	61.714285714285715	10.2	94.5	10	NA	NA
Kin	19	357	5.20.2	6	40	101	92.5	6.419	3.166	14.787	NA	31.014	2.454183266932271	8.964285714285714	22	2.24025974025974	49.285714285714285	10.7	119	0	NA	NA
Kin	19	LA	6.1.2	6	41	104	95	6.365	3.103	14.569	NA	36.14	2.236734693877551	8.75	19.571428571428573	2.0802919708029197	40.714285714285715	10.3	169.6	0	NA	NA
Kin	19	63	6.2.2	6	42	101	100	6.179	3.073	14.089	NA	33.431	2.1354581673306776	8.964285714285714	19.142857142857142	2.544776119402985	48.714285714285715	11.4	162.4	20	NA	NA
Kin	19	15	6.3.2	6	43	109	72.5	5.531	2.697	10.941	NA	21.29	2.6542923433874708	7.696428571428571	20.428571428571427	3.2517482517482517	66.42857142857143	9.9	100	0	NA	NA
Kin	19	55	6.4.2	6	44	100	90	5.704	3.045	12.8	NA	32.229	2.3333333333333335	8.142857142857142	19	2.4962406015037595	47.42857142857143	10.7	111.5	5	NA	NA
Kin	19	19	6.5.2	6	45	100	80	6.182	3.057	14.019	NA	32.119	2.5925925925925926	7.714285714285714	20	2.157142857142857	43.142857142857146	9.7	141	0	NA	NA
Kin	19	25	6.6.2	6	46	103	95	NA	NA	NA	NA	NA	NA	8.142857142857142	19	NA	NA	NA	150.2	15	NA	NA
Kin	19	34	6.7.2	6	47	104	97.5	6.418	2.999	14.066	NA	32.424	2.1847389558232932	8.892857142857142	19.428571428571427	2.426470588235294	47.142857142857146	10.7	NA	5	NA	NA
Kin	19	40	6.8.2	6	48	104	80	6.064	3.055	13.841	NA	30.028	2.007434944237918	9.607142857142858	19.285714285714285	2.688888888888889	51.857142857142854	10.9	130.8	0	NA	NA
Kin	19	MPV	6.9.2	6	49	104	87.5	5.913	3.027	13.009	NA	29.462	2.523605150214592	8.321428571428571	21	2.401360544217687	50.42857142857143	10.4	94.2	10	NA	NA
Kin	19	49	6.10.2	6	50	104	100	6.224	3.011	13.426	NA	32.39	2.393162393162393	8.357142857142858	20	2.2714285714285714	45.42857142857143	10.3	151.8	0	NA	NA
Kin	19	11	6.11.2	6	51	104	92.5	5.889	3.016	12.967	NA	29.598	2.8926553672316384	7.375	21.333333333333332	2.71875	58	10.3	117	0	NA	NA
Kin	19	29	6.12.2	6	52	108	80	5.975	2.961	13.123	NA	32.154	2.4426229508196724	8.714285714285714	21.285714285714285	2.087248322147651	44.42857142857143	10	82.4	0	NA	NA
Kin	19	12	6.13.2	6	53	105	85	6.095	2.973	13.238	NA	27.922	2.2601626016260163	8.785714285714286	19.857142857142858	2.2158273381294964	44	8.6	124.8	0	NA	NA
Kin	19	28	6.14.2	6	54	105	102.5	6.011	2.996	13.181	NA	31.65	2.4107142857142856	8	19.285714285714285	2.2	42.42857142857143	9.4	151.9	0	NA	NA
Kin	19	38	6.15.2	6	55	100	100	6.216	3.192	14.336	NA	36.218	2.495049504950495	7.214285714285714	18	2.4761904761904763	44.57142857142857	11.3	132.1	30	NA	NA
Kin	19	33	6.16.2	6	56	102	97.5	6.249	3.215	14.771	NA	34.675	2.2971887550200805	8.892857142857142	20.428571428571427	2.2587412587412588	46.142857142857146	11.2	117.8	10	NA	NA
Kin	19	2	6.17.2	6	57	106	85	6.153	2.998	13.53	NA	32.399	2.358490566037736	7.571428571428571	17.857142857142858	2.568	45.857142857142854	10.4	89.5	10	NA	NA
Kin	19	64	6.18.2	6	58	103	100	5.943	2.993	13.147	NA	25.065	2.4595185995623634	8.160714285714286	20.071428571428573	2.7544483985765122	55.285714285714285	9.7	81.3	15	NA	NA
Kin	19	5	6.19.2	6	59	105	110	6.066	3.099	13.665	NA	32.733	2.444444444444444	8.357142857142858	20.428571428571427	2.3286713286713288	47.57142857142857	10.9	132.9	0	NA	NA
Kin	19	14	6.20.2	6	60	105	87.5	6.46	2.997	14.243	NA	29.283	2.208955223880597	9.571428571428571	21.142857142857142	2.168918918918919	45.857142857142854	9.4	80.9	5	NA	NA
[truncated: 1,946 more rows]
